# Supplementary material for: Perceiving the Concealed and Unreported Pharmacophoric Features of the 5-Hydroxytryptamine Receptor Using Balanced QSAR Analysis
Source: Pharmaceuticals (Basel). 2022 Jul 5;15(7):834. doi: 10.3390/ph15070834 (PMC9316833; doi:10.3390/ph15070834)
Supplement: Supplementary file 1 [file pharmaceuticals-15-00834-s001.zip › SupplementaryMaterial-Final.xlsx]

## Sheet: Descriptors
S.N.	Original ID	SMILES	Ki(nM)	pKi(M)	AlogP	com_Hhyd_3A	ringC_S_4Bc	fsp3Cdon1B	sp3N_sp2O_8B	KRFPC620	flipo&S_ringN3B	ringC_sumpc	fsp3Cacc1B	nN_no_H	Affinity-Docking score (KCal/mol)
1	CHEMBL1043	Nc1ccc(cc1)S(=O)(=O)c(cc2)ccc2N	183	6.738	1.68	4	-1.846	0	0	0	0	-1.846	0	0	-7.5
2	CHEMBL1076583	C1NCCCC1n(c(c23)cccc3)cc2S(=O)(=O)c4ccccc4	13	7.886	3.4	1	-2.132	1	1	0	0	-2.677	0	1	-9.4
3	CHEMBL1076665	C1NCCC1n(c(c23)cccc3)cc2S(=O)(=O)c4ccccc4	5	8.301	3.01	1	-2.1	1	1	0	0	-2.496	0	1	-9.7
4	CHEMBL1076684	CN(C1)CCC1n(c(c23)cccc3)cc2S(=O)(=O)c(cc4F)ccc4	3.5	8.456	3.49	1	-1.966	1	1	0	0	-2.338	0	2	-9.3
5	CHEMBL1076687	C1NCCC1n(c(c23)ccc(Cl)c3)cc2S(=O)(=O)c(cc4F)ccc4	15	7.824	3.8	2	-1.982	1	1	0	0	-2.417	0	1	-10
6	CHEMBL1079976	CN(C1)CCCC1n(c(c23)cccc3)cc2S(=O)(=O)c4cccc(c45)cccc5	7.1	8.149	4.89	2	-2.217	1	1	0	0	-2.81	0	2	-10.5
7	CHEMBL1079977	C1NCCCC1n(c(c23)cccc3)cc2S(=O)(=O)c(ccc4)c(c45)nccc5	5.6	8.252	3.95	1	-2.025	1	1	0	0	-2.72	0	2	-10
8	CHEMBL1079978	c1ccccc1CN(C2)CCC2n(c(c34)cccc4)cc3S(=O)(=O)c5ccccc5	113	6.947	4.92	3	-2.095	1	1	1	0	-3.046	0	2	-10.6
9	CHEMBL1080316	C1NCCC1n(c(c23)cccc3)cc2S(=O)(=O)c(cc4F)ccc4	4.7	8.328	3.15	1	-1.971	1	1	0	0	-2.368	0	1	-10.1
10	CHEMBL1080331	Fc1cccc(c12)n(C3CCNC3)cc2S(=O)(=O)c(cc4F)ccc4	18	7.745	3.29	2	-1.832	1	1	0	0	-2.205	0	1	-10.1
11	CHEMBL1080380	C1NCCC1n(c(c23)cccc3)cc2S(=O)(=O)c4cccc(c45)cccc5	23.3	7.633	4.16	2	-2.208	1	1	0	0	-2.713	0	1	-10.1
12	CHEMBL1080381	CN(C1)CCC1n(c(c23)cccc3)cc2S(=O)(=O)c4cccc(c45)cccc5	6	8.222	4.5	2	-2.215	1	1	0	0	-2.697	0	2	-10.6
13	CHEMBL1080729	C1NCCC1n(c(c23)cccc3)cc2S(=O)(=O)c(ccc4)c(c45)nccc5	1.5	8.824	3.56	1	-2.003	1	1	0	0	-2.6	0	2	-10.4
14	CHEMBL1080899	CN(C1)CCC1n(c(c23)cccc3)cc2S(=O)(=O)c(ccc4)c(c45)nccc5	2.8	8.553	3.9	1	-1.982	1	1	0	0	-2.521	0	3	-10
15	CHEMBL1081094	CCN(C1)CCCC1n(c(c23)cccc3)cc2S(=O)(=O)c4ccccc4	7.3	8.137	4.13	1	-2.111	1	1	1	0	-2.598	0	2	-9.6
16	CHEMBL1081095	C1NCCCC1n(c(c23)cccc3)cc2S(=O)(=O)c(cc4F)ccc4	6	8.222	3.54	1	-1.998	1	1	0	0	-2.542	0	1	-9.7
17	CHEMBL1081110	COc(c1)ccc(c12)n(C3CCCNC3)cc2S(=O)(=O)c(cc4F)ccc4	10.7	7.971	3.55	2	-1.827	1	1	0	0	-2.43	1	1	-9.8
18	CHEMBL1081793	CCN(C1)CCCC1n(c(c23)ccc(c3)OC)cc2S(=O)(=O)c(cc4F)ccc4	16	7.796	4.28	1	-1.798	1	1	1	0	-2.354	1	2	-10.2
19	CHEMBL1081794	C1NCCCC1n(c(c23)ccc(F)c3)cc2S(=O)(=O)c(cc4F)ccc4	4	8.398	3.68	2	-1.829	1	1	0	0	-2.404	0	1	-9.9
20	CHEMBL1082198	C1NCCC1n(c(c23)ccc(F)c3)cc2S(=O)(=O)c(cc4F)ccc4	9.6	8.018	3.29	1	-1.812	1	1	0	0	-2.273	0	1	-10
21	CHEMBL1082199	CN(C1)CCC1n(c(c23)ccc(F)c3)cc2S(=O)(=O)c(cc4F)ccc4	5	8.301	3.63	1	-1.802	1	1	0	0	-2.209	0	2	-9.6
22	CHEMBL1082200	C1NCCC1n(c(c23)cc(F)cc3)cc2S(=O)(=O)c(cc4F)ccc4	18	7.745	3.29	1	-1.992	1	1	0	0	-2.223	0	1	-10.4
23	CHEMBL1082483	c1nccn1CCCNC(=O)C2CN(c(c23)cccc3)S(=O)(=O)c(c(c45)cccc5)ccc4OC	79.43	7.1	3.54	4	-1.368	1	0	0	0	-2.288	1	3	-9.5
24	CHEMBL1082484	C1CN(C)CCC1N(C)C(=O)C2CN(c(c23)cccc3)S(=O)(=O)c4cccc(c45)c(Cl)ccc5	5.012	8.3	4.34	5	-1.526	1	1	0	0	-2.168	0	3	-10.6
25	CHEMBL1082485	C1CN(C)CCC1N(C)C(=O)C2CN(c(c23)cccc3)S(=O)(=O)c4cccc(c45)cccc5	31.62	7.5	3.68	5	-1.518	1	1	0	0	-2.159	0	3	-9.9
26	CHEMBL1082764	C1CN(C)CCC1N(C)C(=O)C2CN(c(c23)cccc3)S(=O)(=O)c4cccc(c45)nsn5	125.89	6.9	2.54	4	-1.144	1	1	0	0	-1.683	0	5	-9.5
27	CHEMBL1082818	C1CN(C)CCC1N(C)C(=O)C2CN(c(c23)cccc3)S(=O)(=O)c(c(c45)cccc5)ccc4OC	7.943	8.1	3.69	5	-1.417	1	1	0	0	-2.077	1	3	-10.3
28	CHEMBL1083077	C1CCc(c12)n3c(nc2)c(c(n3)N(C)C)S(=O)(=O)c4ccccc4	28.8	7.541	2.12	0	-1.709	0	0	0	0	-2.028	0	4	-9.2
29	CHEMBL1083078	C1CCc(c12)n3c(nc2C)c(c(n3)N(C)C)S(=O)(=O)c4ccccc4	25.5	7.593	2.43	0	-1.684	0	0	0	0	-2.004	0	4	-9.3
30	CHEMBL1083297	C1CN(C)CCC1N(C)C(=O)C2CN(c(c23)cccc3)S(=O)(=O)c(cc4C(F)(F)F)ccc4	25.12	7.6	3.55	4	-1.276	1	1	0	0	-1.819	0	3	-11
31	CHEMBL1083298	C1CN(C)CCC1N(C)C(=O)C2CN(c(c23)cccc3)S(=O)(=O)c(c(C)c4C)ccc4OC	100	7	3.16	4	-1.113	1	1	0	0	-1.661	1	3	-9.9
32	CHEMBL1083909	C1CN(C)CCC1N(C)C(=O)C2CN(c(c23)cccc3)S(=O)(=O)c(cc4)ccc4C(F)(F)F	25.12	7.6	3.55	3	-1.206	1	1	0	0	-1.748	0	3	-10.2
33	CHEMBL1084214	C1CN(C)CCC1N(C)C(=O)C2CN(c(c23)cccc3)S(=O)(=O)c4c(C)cc(OC)c(C)c4C	100	7	3.47	4	-1.083	1	1	0	0	-1.632	1	3	-10
34	CHEMBL1084316	CCN(CC)CCNC(=O)C1CN(c(c12)cccc2)S(=O)(=O)c(c(c34)cccc4)ccc3OC	19.95	7.7	3.6	3	-1.379	2	1	1	0	-1.634	1	2	-8.9
35	CHEMBL1084317	CCN(CC)CCCNC(=O)C1CN(c(c12)cccc2)S(=O)(=O)c(c(c34)cccc4)ccc3OC	79.43	7.1	3.99	3	-1.353	2	1	1	0	-1.598	1	2	-9.4
36	CHEMBL1084483	C1CN(C)CCC1N(C)C(=O)C2CN(c(c23)cccc3)S(=O)(=O)c(ccc4)cc4-c5ccccc5	31.62	7.5	4.2	4	-1.29	1	1	0	0	-2.313	0	3	-11.4
37	CHEMBL1085351	C1CN(C)CCC1N(C)C(=O)C2CN(c(c23)cccc3)S(=O)(=O)c(c4)ccc(c45)cccc5	25.12	7.6	3.68	3	-1.179	1	1	0	0	-2.01	0	3	-10.6
38	CHEMBL1085352	C1CN(C)CCC1N(C)C(=O)C2CN(c(c23)cccc3)S(=O)(=O)C(=C4)C=CC(C45)OCC5	31.62	7.5	2.33	3	-1.249	1	1	0	0	-1.74	1	3	-9.6
39	CHEMBL1085353	C1CN(C)CCC1N(C)C(=O)C2CN(c(c23)cccc3)S(=O)(=O)c(c4)ccc(c45)OCCO5	50.12	7.3	2.3	3	-1.016	1	1	0	0	-1.527	2	3	-8.8
40	CHEMBL1085362	NCC1CN(C1)C(=O)C2CN(c(c23)cccc3)S(=O)(=O)c(c(c45)cccc5)ccc4OC	79.43	7.1	2.56	3	-1.335	1	1	0	0	-1.82	1	2	-9.8
41	CHEMBL1085608	C1CNCCN1C(=O)C2CN(c(c23)cccc3)S(=O)(=O)c(c(c45)cccc5)ccc4OC	7.943	8.1	2.57	4	-1.333	1	1	0	0	-1.975	1	2	-10.4
42	CHEMBL1085835	C1CN(C)CCC1NC(=O)C2CN(c(c23)cccc3)S(=O)(=O)c(c(c45)cccc5)ccc4OC	25.12	7.6	3.35	3	-1.344	2	1	0	0	-1.993	1	2	-10.3
43	CHEMBL1085965	C1CN(C)CCC1N(C)C(=O)C2CN(c(c23)cccc3)S(=O)(=O)c(cc4)ccc4OC(F)(F)F	19.95	7.7	3.43	3	-1.091	1	1	0	0	-1.636	1	3	-9.1
44	CHEMBL1086719	CN(C1)CCC1n(c(c23)cccc3)cc2S(=O)(=O)c4cc(Cl)ccc4	1.3	8.886	4	2	-2.115	1	1	0	0	-2.489	0	2	-9.7
45	CHEMBL1086720	COc(cc1)cc(c12)n(C3CCNC3)cc2S(=O)(=O)c4cc(Cl)ccc4	4.6	8.337	3.67	2	-2.196	1	1	0	0	-2.412	1	1	-10.1
46	CHEMBL1091208	c1ccccc1S(=O)(=O)c2c(SC)nn(c23)cc4c(n3)CCCC4	7.97	8.099	3.16	1	-1.828	0	0	0	0	-2.245	0	3	-8.7
47	CHEMBL1094370	C1NCCC1n(c(c23)cccc3)cc2S(=O)(=O)c4cc(Cl)ccc4	3.2	8.495	3.66	2	-2.103	1	1	0	0	-2.499	0	1	-10.3
48	CHEMBL1112	C1CC(=O)Nc(c12)cc(cc2)OCCCCN3CCN(CC3)c(c4Cl)cccc4Cl	238.132	6.623	4.86	8	0	1	0	1	0	-1.297	1	2	-9.8
49	CHEMBL1170091	c1csc(c12)c(NC(C)C)nc3n2nnc3S(=O)(=O)c4ccccc4	30.2	7.52	2.99	2	-2.26	1	0	0	2	-2.26	0	4	-9.2
50	CHEMBL1170672	C1CCCC1Nc(c(c23)scc2)nc4n3nnc4S(=O)(=O)c5ccccc5	5.5	8.26	3.53	0	-2.297	1	0	0	2	-2.736	0	4	-9.8
51	CHEMBL1170871	CC(C)CCNc(c(c12)scc1)nc3n2nnc3S(=O)(=O)c4ccc(Br)cc4	15.9	7.799	4.39	2	-2.204	1	0	0	2	-2.204	0	4	-9.7
52	CHEMBL1172795	c1ncccc1CNc(c(c23)scc2)nc4n3nnc4S(=O)(=O)c5cc(Cl)ccc5	14.7	7.833	3.83	1	-2.258	1	0	0	2	-2.714	0	5	-10.7
53	CHEMBL1173210	C1CCCN1c(c(c23)scc2)nc4n3nnc4S(=O)(=O)c5ccccc5	87.5	7.058	2.77	2	-2.378	0	0	0	2	-2.584	0	5	-9.1
54	CHEMBL1173508	c1cc(C)cc(c1C)S(=O)(=O)c2nnn3c2nc(N)c(c34)scc4	46	7.337	2.37	0	-2.215	0	0	0	2	-2.215	0	4	-9.4
55	CHEMBL1258607	CN(C)c1cccc(c12)c(ccc2)S(=O)(=O)Nc(c3)ccc(OC)c3N4CCNCC4	8	8.097	3.12	4	-1.288	1	0	0	0	-1.769	1	2	-9.9
56	CHEMBL127411	Cc1ccc(cc1)S(=O)(=O)n(cc2c34)c3cccc4[C@H](O)[C@H](C2)N(C)C	7.2	8.143	2.71	1	-1.504	1	1	0	0	-1.543	0	2	-10.4
57	CHEMBL1275630	C1CNCCN1c(c2)ccc(c23)n(CC(C)C)nc3S(=O)(=O)c4cccc(c45)cccc5	4.6	8.337	4.09	1	-2.014	1	0	0	0	-2.534	0	3	-10.5
58	CHEMBL1276838	CN1CCN(CC1)c(c2)ccc(c23)[nH]nc3S(=O)(=O)c(ccc4)cc4OC	1.1	8.959	2.16	1	-1.773	1	0	0	0	-2.158	1	3	-9.8
59	CHEMBL1276839	CN1CCN(CC1)c(c2)ccc(c23)[nH]nc3S(=O)(=O)c(cc4)ccc4OC	12	7.921	2.16	2	-1.809	1	0	0	0	-2.2	1	3	-9.6
60	CHEMBL1276925	Cc1cc(ccc1)S(=O)(=O)c2n[nH]c(c23)ccc(c3)N(CC4)CCN4C	0.9	9.046	2.46	1	-1.834	1	0	0	0	-2.22	0	3	-10.4
61	CHEMBL1276926	Cc1ccc(cc1)S(=O)(=O)c2n[nH]c(c23)ccc(c3)N(CC4)CCN4C	4.9	8.31	2.46	3	-1.85	1	0	0	0	-2.263	0	3	-10.1
62	CHEMBL1277010	CN1CCN(CC1)c(c2)ccc(c23)[nH]nc3S(=O)(=O)c4cccs4	7.8	8.108	2.21	1	-2.201	1	0	0	0	-2.586	0	3	-9.1
63	CHEMBL1277011	CN1CCN(CC1)c(c2)ccc(c23)[nH]nc3S(=O)(=O)c4c(Cl)cccc4Cl	2.6	8.585	3.45	1	-1.942	1	0	0	0	-2.33	0	3	-9.7
64	CHEMBL1277104	CN1CCN(CC1)c(c2)ccc(c23)[nH]nc3S(=O)(=O)c4cccc(c45)cccc5	1.6	8.796	3.3	3	-2.003	1	0	0	0	-2.525	0	3	-10.1
65	CHEMBL1277105	C1CNCCN1c(c2)ccc(c23)[nH]nc3S(=O)(=O)c4cccc(c45)cccc5	1.1	8.959	2.96	2	-1.957	1	0	0	0	-2.509	0	2	-11.6
66	CHEMBL1277192	C1CNCCN1c(cc2)cc(c23)[nH]nc3S(=O)(=O)c(cc4F)ccc4	11	7.959	1.94	2	-1.774	1	0	0	0	-2.123	0	2	-9.7
67	CHEMBL1277466	CN1CCN(CC1)c(ccc2)c(c23)[nH]nc3S(=O)(=O)c4cccc(c45)cccc5	4.6	8.337	3.3	2	-1.974	1	0	0	0	-2.557	0	3	-10.5
68	CHEMBL1277467	c1ccccc1S(=O)(=O)c2nn(CC)c(c23)ccc(c3)N4CCNCC4	2.9	8.538	2.3	1	-1.884	1	0	0	0	-2.299	0	3	-9.5
69	CHEMBL1277564	CN1CCN(CC1)c(c2)ccc(c23)n(C)nc3S(=O)(=O)c4cccc(c45)cccc5	1.7	8.77	3.31	3	-2.005	1	0	0	0	-2.501	0	4	-10.1
70	CHEMBL1277565	C1CNCCN1c(c2)ccc(c23)n(C)nc3S(=O)(=O)c4cccc(c45)cccc5	1.6	8.796	2.97	2	-2.008	1	0	0	0	-2.527	0	3	-10.3
71	CHEMBL1277656	CN1CCN(CC1)c(c2)ccc(c23)n(CC)nc3S(=O)(=O)c4cccc(c45)cccc5	1.7	8.77	3.79	2	-2.005	1	0	0	0	-2.501	0	4	-10.1
72	CHEMBL1277657	C1CNCCN1c(c2)ccc(c23)n(CC)nc3S(=O)(=O)c4cccc(c45)cccc5	1.9	8.721	3.45	1	-1.977	1	0	0	0	-2.525	0	3	-10.2
73	CHEMBL1277749	c1ccc(cc1F)S(=O)(=O)c2n[nH]c(c23)cccc3N4CCNCC4	134	6.873	1.94	5	-1.731	1	1	0	0	-2.258	0	2	-9.9
74	CHEMBL1277750	C1CNCCN1c2cccc(c23)[nH]nc3S(=O)(=O)c4ccc(Cl)cc4	125	6.903	2.46	6	-1.887	1	1	0	0	-2.418	0	2	-9.6
75	CHEMBL1277751	CN1CCN(CC1)c(c2)ccc(c23)n(CCC)nc3S(=O)(=O)c4cccc(c45)cccc5	1.8	8.745	4.18	2	-1.98	1	0	0	0	-2.505	0	4	-10.3
76	CHEMBL1277752	C1CNCCN1c(c2)ccc(c23)n(CCC)nc3S(=O)(=O)c4cccc(c45)cccc5	2.2	8.658	3.84	1	-1.978	1	0	0	0	-2.526	0	3	-10.3
77	CHEMBL1277835	COc1ccc(cc1)S(=O)(=O)c2n[nH]c(c23)cccc3N4CCNCC4	88	7.056	1.81	4	-1.76	1	1	0	0	-2.293	1	2	-9.2
78	CHEMBL1277836	CN1CCN(CC1)c(c2)ccc(c23)n(C(C)C)nc3S(=O)(=O)c4cccc(c45)cccc5	1.8	8.745	4.36	1	-2.013	1	0	0	0	-2.51	0	4	-10.4
79	CHEMBL1277837	C1CNCCN1c(c2)ccc(c23)n(C(C)C)nc3S(=O)(=O)c4cccc(c45)cccc5	2.9	8.538	4.01	2	-2	1	0	0	0	-2.562	0	3	-10.6
80	CHEMBL1277916	C1CNCCN1c2cccc(c23)[nH]nc3S(=O)(=O)c4cccc(c45)cccc5	48	7.319	2.96	5	-2.035	1	1	0	0	-2.676	0	2	-9.3
81	CHEMBL1277917	CN1CCN(CC1)c(c2)ccc(c23)[nH]nc3S(=O)(=O)c4ccccc4	1.9	8.721	2.15	1	-1.862	1	0	0	0	-2.25	0	3	-9.8
82	CHEMBL1277918	CN1CCN(CC1)c(c2)ccc(c23)n(CC(C)C)nc3S(=O)(=O)c4cccc(c45)cccc5	1.4	8.854	4.43	1	-1.987	1	0	0	0	-2.507	0	4	-10.5
83	CHEMBL1277998	CN1CCN(CC1)c(c2)ccc(c23)[nH]nc3S(=O)(=O)c(c4F)cccc4	5.5	8.26	2.29	3	-1.752	1	0	0	0	-2.166	0	3	-10
84	CHEMBL1277999	CN1CCN(CC1)c(c2)ccc(c23)[nH]nc3S(=O)(=O)c(cc4F)ccc4	1.7	8.77	2.29	2	-1.775	1	0	0	0	-2.168	0	3	-10.1
85	CHEMBL1278000	CN1CCN(CC1)c(c2)ccc(c23)n(Cc4ccccc4)nc3S(=O)(=O)c5cccc(c56)cccc6	2	8.699	4.82	1	-1.977	1	0	0	0	-3.066	0	4	-10.9
86	CHEMBL1278001	C1CNCCN1c(c2)ccc(c23)n(Cc4ccccc4)nc3S(=O)(=O)c5cccc(c56)cccc6	7.5	8.125	4.48	1	-2.001	1	0	0	0	-3.121	0	3	-10.3
87	CHEMBL1278090	CN1CCN(CC1)c(c2)ccc(c23)[nH]nc3S(=O)(=O)c(cc4)ccc4F	5.2	8.284	2.29	3	-1.775	1	0	0	0	-2.168	0	3	-10.2
88	CHEMBL1278091	CN1CCN(CC1)c(c2)ccc(c23)[nH]nc3S(=O)(=O)c4c(Cl)cccc4	4	8.398	2.8	3	-1.917	1	0	0	0	-2.336	0	3	-9.7
89	CHEMBL1278092	c1ccccc1S(=O)(=O)c2nn(C)c(c23)ccc(c3)N4CCNCC4	3.2	8.495	1.82	1	-1.891	1	0	0	0	-2.299	0	3	-9.6
90	CHEMBL1278179	CN1CCN(CC1)c(c2)ccc(c23)[nH]nc3S(=O)(=O)c4cc(Cl)ccc4	1	9	2.8	2	-1.894	1	0	0	0	-2.309	0	3	-10.1
91	CHEMBL1278180	CN1CCN(CC1)c(c2)ccc(c23)[nH]nc3S(=O)(=O)c4ccc(Cl)cc4	8.1	8.092	2.8	2	-1.926	1	0	0	0	-2.316	0	3	-10.1
92	CHEMBL131495	c1cccc(c12)C(=O)N(C2=O)CCCCN(CC3)CC=C3c4c[nH]c(c45)ccc(F)c5	398.11	6.4	4.47	7	0	1	1	1	0	-0.982	0	2	-11
93	CHEMBL142936	CCN(CC)CCc1c[nH]c(c12)cccc2	575	6.24	3.05	6	0	1	0	1	0	-0.957	0	1	-6.4
94	CHEMBL1628227	CN(C)CCC=C1c(cccc2)c2OCc(c13)cccc3	105	6.979	3.96	3	0	1	0	0	0	-0.817	1	1	-8.9
95	CHEMBL1642114	c1ccccc1S(=O)(=O)c2c(SC)nn(c2nc(c34)CCC3)c4N5CCNCC5	0.85	9.071	2.18	0	-1.72	1	0	0	0	-2.425	0	4	-9.6
96	CHEMBL1642412	CC(C)c1ccc(cc1)S(=O)(=O)n(c(c23)cccc3)cc2N(CC4)CCN4C	3.4	8.469	3.75	2	-1.487	1	1	0	0	-2.005	0	3	-9.6
97	CHEMBL1642413	CN1CCN(CC1)c2cn(c(c23)cccc3)S(=O)(=O)c(cc4)ccc4F	11.8	7.928	2.77	1	-1.354	1	1	0	0	-1.793	0	3	-9.8
98	CHEMBL1642414	CN1CCN(CC1)c2cn(c(c23)cccc3)S(=O)(=O)c4cc(Cl)ccc4	10.8	7.967	3.28	1	-1.505	1	1	0	0	-1.947	0	3	-10
99	CHEMBL1642415	CN1CCN(CC1)c2cn(c(c23)cccc3)S(=O)(=O)c4c(Br)cccc4	15.2	7.818	3.39	1	-1.481	1	1	0	0	-1.945	0	3	-9.5
100	CHEMBL1642416	CN1CCN(CC1)c2cn(c(c23)cccc3)S(=O)(=O)c4ccccc4	15.9	7.799	2.63	1	-1.499	1	1	0	0	-1.961	0	3	-9.4
101	CHEMBL1642417	CC(C)c1ccc(cc1)S(=O)(=O)n(c(c23)cccc3)cc2N(CC4)CCN4CC	8.6	8.066	4.14	1	-1.46	1	1	1	0	-1.904	0	3	-10.3
102	CHEMBL1642418	CN1CCN(CC1)c2cn(c(c23)ccc(Br)c3)S(=O)(=O)c4cc(Cl)ccc4	7.8	8.108	4.05	1	-1.447	1	1	0	0	-1.895	0	3	-9.6
103	CHEMBL1642419	CN1CCN(CC1)c2cn(c(c23)ccc(Br)c3)S(=O)(=O)c(cc4)ccc4F	9.2	8.036	3.53	0	-1.306	1	1	0	0	-1.753	0	3	-9.4
104	CHEMBL1642420	CCN1CCN(CC1)c2cn(c(c23)ccc(Br)c3)S(=O)(=O)c(cc4)ccc4F	10.6	7.975	3.92	1	-1.297	1	1	1	0	-1.746	0	3	-9.5
105	CHEMBL1642421	CC(C)c1ccc(cc1)S(=O)(=O)n(c(c23)ccc(Br)c3)cc2N(CC4)CCN4C	23.2	7.635	4.52	1	-1.404	1	1	0	0	-1.847	0	3	-10.3
106	CHEMBL1642422	CC(C)c1ccc(cc1)S(=O)(=O)n(c(c23)ccc(Br)c3)cc2N(CC4)CCN4CC	30.1	7.521	4.91	1	-1.41	1	1	1	0	-1.858	0	3	-10.1
107	CHEMBL1642424	CCN1CCN(CC1)c2cn(c(c23)ccc(Cl)c3)S(=O)(=O)c(cc4)ccc4F	10.7	7.971	3.81	1	-1.343	1	1	1	0	-1.809	0	3	-9.5
108	CHEMBL1642425	CCN1CCN(CC1)c2cn(c(c23)ccc(Cl)c3)S(=O)(=O)c4c(Br)cccc4	20.3	7.693	4.44	1	-1.454	1	1	1	0	-1.928	0	3	-9.6
109	CHEMBL1642426	CC(C)c1ccc(cc1)S(=O)(=O)n(c(c23)ccc(Cl)c3)cc2N(CC4)CCN4CC	30.5	7.516	4.8	1	-1.447	1	1	1	0	-1.913	0	3	-10.3
110	CHEMBL1642427	CCN1CCN(CC1)c2cn(c(c23)cc(Cl)cc3)S(=O)(=O)c(cc4)ccc4OC	82.3	7.085	3.68	1	-1.397	1	1	1	0	-1.853	1	3	-9.7
111	CHEMBL1642428	CC(C)c1ccc(cc1)S(=O)(=O)n(c(c23)cc(Cl)cc3)cc2N(CC4)CCN4C	55.3	7.257	4.41	3	-1.471	1	1	0	0	-1.984	0	3	-10
112	CHEMBL1642429	CCN1CCN(CC1)c2cn(c(c23)cc(Cl)cc3)S(=O)(=O)c(c4OC)cc(cc4)OC	63.5	7.197	3.69	2	-1.276	1	1	1	0	-1.715	2	3	-9.2
113	CHEMBL1642430	CCN1CCN(CC1)c2cn(c(c23)cc(Cl)cc3)S(=O)(=O)c(c4)ccc(c45)cccc5	25.5	7.593	4.83	1	-1.429	1	1	1	0	-2.153	0	3	-10.7
114	CHEMBL1642431	CN1CCN(CC1)c2cn(c(c23)cc(Cl)cc3)S(=O)(=O)c4c(Br)cccc4	30.2	7.52	4.05	1	-1.482	1	1	0	0	-1.946	0	3	-9.7
115	CHEMBL1642845	C1CNCCC1Nc2cccc(c23)[nH]nc3S(=O)(=O)c4cccc(c45)cccc5	2.8	8.553	3.71	3	-2.148	2	0	0	0	-2.721	0	1	-10.1
116	CHEMBL1642846	C1NCCCC1Nc2cccc(c23)[nH]nc3S(=O)(=O)c4cccc(c45)cccc5	4.2	8.377	3.71	1	-2.085	2	1	0	0	-2.737	0	1	-9.7
117	CHEMBL1642848	NCCNc(c1)ccc(c12)[nH]nc2S(=O)(=O)c3cccc(c34)cccc4	6.7	8.174	2.92	2	-2.037	2	0	0	0	-2.257	0	1	-9.3
118	CHEMBL1642849	CC(N)CNc(c1)ccc(c12)[nH]nc2S(=O)(=O)c3cccc(c34)cccc4	1.4	8.854	3.31	2	-2.046	2	0	0	0	-2.256	0	1	-9.6
119	CHEMBL1642850	CC(C)[C@H](N)CNc(c1)ccc(c12)[nH]nc2S(=O)(=O)c3cccc(c34)cccc4	4.3	8.367	3.94	2	-2.046	2	0	0	0	-2.262	0	1	-9.9
120	CHEMBL1642851	C1CNCCC1Nc(c2)ccc(c23)[nH]nc3S(=O)(=O)c4cccc(c45)cccc5	0.7	9.155	3.71	1	-1.99	2	0	0	0	-2.677	0	1	-10.7
121	CHEMBL1642852	C1NCCCC1Nc(c2)ccc(c23)[nH]nc3S(=O)(=O)c4cccc(c45)cccc5	1.7	8.77	3.71	2	-2.053	2	0	0	0	-2.724	0	1	-10.3
122	CHEMBL1642853	C1CNCCC1CNc(c2)ccc(c23)[nH]nc3S(=O)(=O)c4cccc(c45)cccc5	3.5	8.456	3.96	2	-2.036	2	0	0	0	-2.698	0	1	-10.4
123	CHEMBL1642862	NCCNCc(c1)ccc(c12)[nH]nc2S(=O)(=O)c3cccc(c34)cccc4	12	7.921	2.6	2	-2.038	2	1	0	0	-2.196	0	1	-9.5
124	CHEMBL1642863	CN(C)CCN(C)Cc(c1)ccc(c12)[nH]nc2S(=O)(=O)c3cccc(c34)cccc4	14	7.854	3.54	2	-2.031	2	1	0	0	-2.19	0	3	-9.5
125	CHEMBL1642866	C1CNCCC1C(=O)Nc(c2)ccc(c23)[nH]nc3S(=O)(=O)c4cccc(c45)cccc5	1.1	8.959	3.49	2	-2.043	1	1	0	0	-2.727	0	1	-10.9
126	CHEMBL1642867	NCCC(=O)Nc(cc1)cc(c12)[nH]nc2S(=O)(=O)c3cccc(c34)cccc4	24	7.62	2.84	1	-2.111	1	1	0	0	-2.23	0	1	-9.7
127	CHEMBL1642869	CCN(CC)CCC(=O)Nc(cc1)cc(c12)[nH]nc2S(=O)(=O)c3cccc(c34)cccc4	65	7.187	4.22	3	-2.064	1	1	1	0	-2.207	0	2	-9.8
128	CHEMBL1642870	C1CCCCN1CCC(=O)Nc(cc2)cc(c23)[nH]nc3S(=O)(=O)c4cccc(c45)cccc5	12	7.921	4.36	2	-2.047	1	1	1	0	-2.615	0	2	-11.1
129	CHEMBL1642871	C1CNCCC1C(=O)Nc(cc2)cc(c23)[nH]nc3S(=O)(=O)c4cccc(c45)cccc5	31	7.509	3.49	1	-2.068	1	1	0	0	-2.652	0	1	-11.1
130	CHEMBL1642872	NCCC(=O)Nc(ccc1)c(c12)[nH]nc2S(=O)(=O)c3cccc(c34)cccc4	3.4	8.469	2.84	2	-1.978	1	1	0	0	-2.18	0	1	-10.2
131	CHEMBL1642873	CN(C)CCC(=O)Nc(ccc1)c(c12)[nH]nc2S(=O)(=O)c3cccc(c34)cccc4	4.8	8.319	3.44	1	-1.987	1	1	0	0	-2.158	0	2	-10.5
132	CHEMBL1642874	CCN(CC)CCC(=O)Nc(ccc1)c(c12)[nH]nc2S(=O)(=O)c3cccc(c34)cccc4	27	7.569	4.22	2	-1.981	1	1	1	0	-2.172	0	2	-10.5
133	CHEMBL1642875	C1CCCCN1CCC(=O)Nc(ccc2)c(c23)[nH]nc3S(=O)(=O)c4cccc(c45)cccc5	24	7.62	4.36	1	-1.99	1	1	1	0	-2.608	0	2	-11.7
134	CHEMBL1642877	C1NCCCC1C(=O)Nc(ccc2)c(c23)[nH]nc3S(=O)(=O)c4cccc(c45)cccc5	9.8	8.009	3.49	1	-1.931	1	1	0	0	-2.673	0	1	-12
135	CHEMBL1642878	CN(C)CCNC(=O)c(c1)ccc(c12)[nH]nc2S(=O)(=O)c3cccc(c34)cccc4	2.9	8.538	2.84	2	-2.014	2	1	0	0	-2.175	0	2	-9.8
136	CHEMBL1642880	C1CNCCC1Nc(c2)ccc(c23)[nH]nc3S(=O)(=O)c4ccccc4	3.1	8.509	2.56	1	-1.853	2	0	0	0	-2.439	0	1	-9.6
137	CHEMBL1642882	C1CNCCC1Nc(c2)ccc(c23)[nH]nc3S(=O)(=O)c4cc(Cl)ccc4	1	9	3.21	1	-1.867	2	0	0	0	-2.453	0	1	-9.9
138	CHEMBL1642883	Cc1cc(ccc1)S(=O)(=O)c2n[nH]c(c23)ccc(c3)NC4CCNCC4	0.8	9.097	2.87	1	-1.827	2	0	0	0	-2.41	0	1	-10
139	CHEMBL1642885	C1CNCCC1Nc(c2)ccc(c23)[nH]nc3S(=O)(=O)c4ccc(Cl)cc4	2.3	8.638	3.21	1	-1.894	2	0	0	0	-2.477	0	1	-9.8
140	CHEMBL1642886	CC(C)c1ccc(cc1)S(=O)(=O)c2n[nH]c(c23)ccc(c3)NC4CCNCC4	1	9	3.68	1	-1.826	2	0	0	0	-2.414	0	1	-10.5
141	CHEMBL1642887	FC(F)(F)c1ccc(cc1)S(=O)(=O)c2n[nH]c(c23)ccc(c3)NC4CCNCC4	1.5	8.824	3.58	1	-1.828	2	0	0	0	-2.413	0	1	-10.2
142	CHEMBL1642889	C1CNCCC1Nc(c2)ccc(c23)[nH]nc3S(=O)(=O)c(c4)ccc(c45)cccc5	0.6	9.222	3.71	1	-1.777	2	0	0	0	-2.655	0	1	-10.8
143	CHEMBL1668501	Cc(n1)ccn(c12)nc(SC)c2S(=O)(=O)c3ccccc3	16.6	7.78	2.59	1	-1.81	0	0	0	0	-1.976	0	3	-8.2
144	CHEMBL1668502	n1ccc(C)n(c12)nc(SC)c2S(=O)(=O)c3ccccc3	22.91	7.64	2.59	0	-1.799	0	0	0	0	-1.98	0	3	-8.4
145	CHEMBL1668570	n1cccn(c12)nc(SC)c2S(=O)(=O)c3cc(Cl)ccc3	15.14	7.82	2.94	1	-1.855	0	0	0	0	-2.023	0	3	-8.5
146	CHEMBL1668574	Cc(n1)cc(C)n(c12)nc(SC)c2S(=O)(=O)c(cc3)ccc3F	6.761	8.17	3.04	1	-1.623	0	0	0	0	-1.803	0	3	-8.7
147	CHEMBL1668575	n1cccn(c12)nc(SC)c2S(=O)(=O)c(cc3)ccc3F	131.83	6.88	2.42	2	-1.715	0	0	0	0	-1.881	0	3	-8.2
148	CHEMBL1668576	Cc(n1)cc(C)n(c12)nc(SC)c2S(=O)(=O)c(cc3)ccc3O	3.981	8.4	2.61	0	-1.665	0	0	0	0	-1.844	0	3	-8.3
149	CHEMBL1668577	Cc(n1)cc(C)n(c12)nc(SC)c2S(=O)(=O)c(cc3)ccc3OC	37.15	7.43	2.91	1	-1.658	0	0	0	0	-1.838	1	3	-8.3
150	CHEMBL1668578	Cc(n1)cc(C)n(c12)nc(SC)c2S(=O)(=O)c(cc3)ccc3N(C)C	37.15	7.43	2.97	1	-1.779	0	0	0	0	-1.96	0	4	-7.7
151	CHEMBL1668579	n1cccn(c12)nc(SC)c2S(=O)(=O)c(cc3)cc(Cl)c3F	44.67	7.35	3.08	1	-1.733	0	0	0	0	-1.898	0	3	-8.8
152	CHEMBL1668581	Cc(n1)ccn(c12)nc(SC)c2S(=O)(=O)c(cc3)cc(Cl)c3F	7.943	8.1	3.38	2	-1.691	0	0	0	0	-1.856	0	3	-9
153	CHEMBL1668583	n1cccn(c12)nc(NC)c2S(=O)(=O)c3ccccc3	3.89	8.41	1.6	1	-1.724	1	0	0	0	-1.92	0	3	-8
154	CHEMBL1668585	Cc(n1)ccn(c12)nc(NC)c2S(=O)(=O)c3ccccc3	1.445	8.84	1.91	0	-1.686	1	0	0	0	-1.882	0	3	-8.2
155	CHEMBL1668587	Cc(n1)cc(COC)n(c12)nc(NC)c2S(=O)(=O)c3ccccc3	7.586	8.12	2.06	0	-1.662	1	0	0	0	-1.838	1	3	-8.1
156	CHEMBL1668589	n1cccn(c12)nc(NC)c2S(=O)(=O)c3cc(Cl)ccc3	1.175	8.93	2.26	1	-1.732	1	0	0	0	-1.927	0	3	-8.5
157	CHEMBL1668593	n1cccn(c12)nc(NC)c2S(=O)(=O)c(cc3)ccc3F	11.75	7.93	1.74	1	-1.591	1	0	0	0	-1.785	0	3	-8.2
158	CHEMBL1668594	Cc(n1)cc(C)n(c12)nc(NC)c2S(=O)(=O)c(cc3)ccc3O	1.995	8.7	1.93	0	-1.534	1	0	0	0	-1.743	0	3	-8.4
159	CHEMBL1668595	Cc(n1)cc(C)n(c12)nc(NC)c2S(=O)(=O)c(cc3)ccc3OC	9.55	8.02	2.23	2	-1.539	1	0	0	0	-1.747	1	3	-8.8
160	CHEMBL1733660	COc(c1)cc(OC)cc1N(C(=O)CS2)C23c4c(NC3=O)cccc4	88	7.056	2.59	2	-0.584	0	0	0	0	-0.623	2	1	-8.5
161	CHEMBL175718	Cc1cccc(c12)COC(=O)N2C3CCN(CC3)S(=O)(=O)c(ccc4)c(c45)cccc5N(C)C	336	6.474	4.52	7	-1.257	1	1	0	0	-1.449	1	3	-9.4
162	CHEMBL175732	c1cccc(c12)scc2S(=O)(=O)N(CC3)CCC3N(C(=O)OC4)c(c45)cccc5	125.8	6.9	4.21	8	-1.631	1	1	0	0	-1.761	1	2	-10.5
163	CHEMBL175794	CCN(CC)CCn(cc1)c(c12)ccc(c2)NS(=O)(=O)c3cccc(c34)cccc4	116.2	6.935	4.94	3	-1.353	1	0	1	0	-1.973	0	2	-9.8
164	CHEMBL175798	C1COCCN1CCc2c[nH]c(c23)ccc(c3)NS(=O)(=O)c(cc4)nc(c45)cccc5	117	6.932	3.39	3	-1.146	1	0	1	0	-2.046	1	2	-10.4
165	CHEMBL175940	CN(C)CCn(cc1)c(c12)ccc(c2)NS(=O)(=O)c(c(n3)Cl)n(c34)ccs4	1.9	8.721	3.37	2	-2.039	1	0	0	0	-2.528	0	4	-8.4
166	CHEMBL175980	Cc1cccc(c12)COC(=O)N2C3CCN(CC3)S(=O)(=O)c(c4OC)cc(cc4)OC	131.3	6.882	3.32	6	-0.926	1	1	0	0	-0.992	3	2	-9.5
167	CHEMBL176117	CN(C)CCn(cc1)c(c12)cccc2NS(=O)(=O)c(c3)ccc(c34)cccc4	14.9	7.827	4.16	2	-1.356	1	0	0	0	-1.964	0	2	-9.9
168	CHEMBL176134	CCN(CC)CCn(cc1)c(c12)ccc(c2)NS(=O)(=O)c(c3)ccc(c34)cccc4	140.5	6.852	4.94	3	-1.207	1	0	1	0	-2.016	0	2	-9.9
169	CHEMBL176218	CN(C)C(=O)C(=O)c1c[nH]c(c12)ccc(c2)NS(=O)(=O)c(c(n3)Cl)n(c34)ccs4	18.4	7.735	2.6	2	-1.98	0	0	0	0	-2.569	0	3	-9.4
170	CHEMBL1762569	Cc(n1)cc(C)n(c12)nc(N(C)C)c2S(=O)(=O)c3ccccc3	14.5	7.839	2.24	1	-1.6	0	0	0	0	-1.794	0	4	-8.8
171	CHEMBL1762570	Cc(n1)cc(C)n(c12)nc(C)c2S(=O)(=O)c3ccccc3	88.8	7.052	2.49	1	-1.601	0	0	0	0	-1.791	0	3	-8.6
172	CHEMBL177005	C1CCCN1CCn(cc2)c(c23)cc(cc3)NS(=O)(=O)c(c4)ccc(c45)cccc5	100.8	6.997	4.69	4	-1.222	1	0	1	0	-2.302	0	2	-10.9
173	CHEMBL178123	Nc1ccc(cc1)S(=O)(=O)n(c(c23)ccc(c3)[N+]([O-])=O)cc2C4=CCNCC4	29	7.538	2.75	2	-1.35	1	1	0	0	-2.118	0	2	-10.4
174	CHEMBL178193	C1CNCC=C1c2cn(c(c23)ccc(c3)OC)S(=O)(=O)c(c4)ccc(c45)cccc5	19	7.721	4.42	1	-1.497	1	1	0	0	-2.112	1	1	-11.1
175	CHEMBL178234	s1c(Cl)ccc1S(=O)(=O)n(c(c23)cccc3)cc2C4=CCNCC4	3	8.523	3.97	1	-1.849	1	1	0	0	-2.309	0	1	-10.1
176	CHEMBL1782357	c1cccc(c1C)Sc(cc2)cc(c23)N4C(C3)CNCC4	81	7.092	3.48	3	-1.193	1	0	0	1	-1.527	0	1	-9.3
177	CHEMBL1782358	Cc1cc(ccc1)Sc(cc2)cc(c23)N4C(C3)CNCC4	50	7.301	3.48	3	-1.186	1	0	0	1	-1.523	0	1	-9.4
178	CHEMBL1782359	Cc1ccc(cc1)Sc(cc2)cc(c23)N4C(C3)CNCC4	110	6.959	3.48	3	-1.191	1	0	0	1	-1.528	0	1	-9.3
179	CHEMBL1782360	c1cccc(c1OC)Sc(cc2)cc(c23)N4C(C3)CNCC4	23	7.638	3.18	2	-1.08	1	0	0	1	-1.413	1	1	-8.8
180	CHEMBL1782361	COc1cc(ccc1)Sc(cc2)cc(c23)N4C(C3)CNCC4	110	6.959	3.18	3	-1.117	1	0	0	1	-1.455	1	1	-8.6
181	CHEMBL1782362	COc1ccc(cc1)Sc(cc2)cc(c23)N4C(C3)CNCC4	78	7.108	3.18	3	-1.112	1	0	0	1	-1.447	1	1	-8.7
182	CHEMBL1782363	C1CNCC(C2)N1c(c23)cc(cc3)Sc(c4F)cccc4	150	6.824	3.31	2	-1.067	1	0	0	1	-1.405	0	1	-9.1
183	CHEMBL1782364	C1CNCC(C2)N1c(c23)cc(cc3)Sc(cc4)ccc4F	160	6.796	3.31	3	-1.091	1	0	0	1	-1.434	0	1	-9
184	CHEMBL1782365	c1cccc(c1C(F)(F)F)Sc(cc2)cc(c23)N4C(C3)CNCC4	330	6.481	4.19	3	-1.148	1	0	0	1	-1.488	0	1	-9.8
185	CHEMBL1782366	FC(F)(F)c1cc(ccc1)Sc(cc2)cc(c23)N4C(C3)CNCC4	300	6.523	4.19	3	-1.159	1	0	0	1	-1.497	0	1	-10
186	CHEMBL1783582	CC(C)c1ccc(cc1)S(=O)(=O)c(c2)ccc(c23)[nH]nc3C4CCN(C)CC4	14	7.854	4.33	3	-1.779	1	0	0	0	-2.144	0	2	-10.3
187	CHEMBL1783599	C1CN(C)CCC1c2n[nH]c(c23)ccc(c3)S(=O)(=O)c4ccccc4	55	7.26	3.2	4	-1.813	1	0	0	0	-2.178	0	2	-10.1
188	CHEMBL1783601	C1CN(C)CCC1c2n[nH]c(c23)ccc(c3)S(=O)(=O)c4cc(Cl)ccc4	19	7.721	3.86	2	-1.82	1	0	0	0	-2.185	0	2	-10.5
189	CHEMBL1783607	C1CN(C)CCC1c2n[nH]c(c23)ccc(c3)S(=O)(=O)c4cccc(c45)cccc5	3.8	8.42	4.36	2	-1.922	1	0	0	0	-2.375	0	2	-11.2
190	CHEMBL1783608	C1CN(C)CCC1c2n[nH]c(c23)ccc(c3)S(=O)(=O)c(c4)ccc(c45)cccc5	9.6	8.018	4.36	3	-1.732	1	0	0	0	-2.383	0	2	-11.5
191	CHEMBL1785058	CCN1CCN(CC1)Cc(c2)ccc(c23)n(cc3)S(=O)(=O)c4ccc(Cl)cc4	28.2	7.55	3.67	2	-1.512	2	1	2	0	-1.928	0	3	-9.9
192	CHEMBL1785060	C1CN(C)CCN1Cc(c2)ccc(c23)n(cc3)S(=O)(=O)c(cc4)ccc4F	14.6	7.836	2.76	2	-1.352	2	1	1	0	-1.766	0	3	-10.1
193	CHEMBL1785061	CC(C)c1ccc(cc1)S(=O)(=O)n(cc2)c(c23)ccc(c3)CN4CCN(C)CC4	17.9	7.747	3.75	2	-1.455	2	1	1	0	-1.869	0	3	-10.5
194	CHEMBL1785062	FC(F)(F)c1cc(c(Cl)cc1)S(=O)(=O)n(cc2)c(c23)ccc(c3)CN4CCN(C)CC4	11.3	7.947	4.3	2	-1.482	2	1	1	0	-1.892	0	3	-10.4
195	CHEMBL1785063	C1CN(C)CCN1Cc(c2)ccc(c23)n(cc3)S(=O)(=O)c4c(Br)cccc4	8.3	8.081	3.39	2	-1.475	2	1	1	0	-1.886	0	3	-9.5
196	CHEMBL1785064	C1CN(C)CCN1Cc(c2)ccc(c23)n(cc3)S(=O)(=O)c(c4Cl)cccc4Cl	18	7.745	3.93	2	-1.545	2	1	1	0	-1.985	0	3	-9.9
197	CHEMBL1785066	FC(F)(F)c1cc(ccc1)S(=O)(=O)n(cc2)c(c23)ccc(c3)CN4CCN(C)CC4	3.15	8.502	3.64	1	-1.439	2	1	1	0	-1.848	0	3	-11
198	CHEMBL1785067	C1CNCCN1Cc(c2)ccc(c23)n(cc3)S(=O)(=O)c4c(Br)cccc4	7.77	8.11	3.05	2	-1.474	2	1	1	0	-1.911	0	2	-9.7
199	CHEMBL1785069	CC(C)c1ccc(cc1)S(=O)(=O)n(cc2)c(c23)ccc(c3)CN4CCNCC4	14.9	7.827	3.41	2	-1.455	2	1	1	0	-1.892	0	2	-9.9
200	CHEMBL1785070	C1CNCCN1Cc(c2)ccc(c23)n(cc3Cl)S(=O)(=O)c(cc4)ccc4F	2.58	8.588	3.08	1	-1.372	2	1	1	0	-1.807	0	2	-9.9
201	CHEMBL1785071	C1CNCCN1Cc(c2)ccc(c23)n(cc3Cl)S(=O)(=O)c(c4F)ccc(F)c4	5.57	8.254	3.22	1	-1.244	2	1	1	0	-1.673	0	2	-10.1
202	CHEMBL1785073	C1CN(C)CCN1Cc(c2)ccc(c23)n(cc3Cl)S(=O)(=O)c4ccc(Cl)cc4	9.33	8.03	3.93	2	-1.531	2	1	1	0	-1.941	0	3	-10.3
203	CHEMBL178767	Nc1ccc(cc1)S(=O)(=O)n(c(c23)ccc(Br)c3)cc2C4=CCNCC4	7	8.155	3.6	1	-1.479	1	1	0	0	-1.942	0	1	-10.1
204	CHEMBL178869	c1ccccc1S(=O)(=O)n(c(c23)ccc(F)c3)cc2C4CCNCC4	20	7.699	3.48	2	-1.504	1	1	0	0	-1.828	0	1	-10.1
205	CHEMBL178870	Nc1ccc(cc1)S(=O)(=O)n(c(c23)cc(Cl)cc3)cc2C4CCNCC4	3	8.523	3.58	2	-1.551	1	1	0	0	-2.057	0	1	-9.7
206	CHEMBL179006	C1CCCN1CCn(cc2)c(c23)cc(cc3)NS(=O)(=O)c4cccc(c45)cccc5	18.6	7.73	4.69	3	-1.408	1	0	1	0	-2.316	0	2	-9.9
207	CHEMBL179034	c1cccc(c12)cccc2S(=O)(=O)N(CC3)CCC3N(C(=O)OC4)c(c45)cccc5	51.7	7.287	4.15	6	-1.349	1	1	0	0	-1.575	1	2	-11.5
208	CHEMBL179173	C1CNCC=C1c2cn(c(c23)cccc3)S(=O)(=O)c(c4)ccc(c45)cccc5	27	7.569	4.41	2	-1.413	1	1	0	0	-2.22	0	1	-11.2
209	CHEMBL179232	CCCCS(=O)(=O)n(c(c12)cccc2)cc1C3=CCNCC3	77	7.114	3	1	-0.602	1	1	0	0	-1.124	0	1	-8.8
210	CHEMBL179264	c1cccc(c12)cccc2CCS(=O)(=O)Nc(cc3)cc(c34)n(cc4)CCN5CCCC5	194.8	6.71	4.87	5	-0.627	1	0	1	0	-2.049	0	2	-10.6
211	CHEMBL179344	CN(C)CCn(cc1)c(c12)cc(cc2)NS(=O)(=O)c3cccc(c34)cccc4	19.9	7.701	4.16	3	-1.406	1	0	0	0	-1.97	0	2	-9.5
212	CHEMBL180066	C1CN(C)CC=C1c2cn(c(c23)cccc3)S(=O)(=O)c(c4F)cccc4	10	8	3.74	1	-1.323	1	1	0	0	-1.761	0	2	-10.7
213	CHEMBL180221	C1CN(C)CC=C1c2cn(c(c23)cccc3)S(=O)(=O)c4c(Cl)cccc4	10	8	4.25	1	-1.492	1	1	0	0	-1.927	0	2	-10.4
214	CHEMBL180765	C1CN(C)CC=C1c2cn(c(c23)cccc3)S(=O)(=O)c(cc4)ccc4F	5	8.301	3.74	1	-1.328	1	1	0	0	-1.763	0	2	-10.6
215	CHEMBL180823	c1cc(Cl)ccc1S(=O)(=O)n(c(c23)ccc(F)c3)cc2C4=CCNCC4	14	7.854	4.05	2	-1.531	1	1	0	0	-1.89	0	1	-11.1
216	CHEMBL180826	c1ccccc1S(=O)(=O)n(c(c23)cccc3)cc2C4CCNCC4	12	7.921	3.35	2	-1.479	1	1	0	0	-1.97	0	1	-9.9
217	CHEMBL181425	c1ccccc1COc(c2)ccc(c23)n(S(=O)(=O)c(cc4)ccc4N)cc3C5=CCNCC5	50	7.301	4.42	2	-1.607	1	1	0	0	-2.453	1	1	-10.6
218	CHEMBL181938	CC(C)(C)OC(=O)N(CC1)CC=C1c2cn(c(c23)cccc3)S(=O)(=O)c4ccccc4	54	7.268	4.9	4	-1.47	0	0	0	0	-1.898	1	2	-11.1
219	CHEMBL182000	C1CNCC=C1c2cn(c(c23)ccc(F)c3)S(=O)(=O)c4cccc(c45)cccc5	4	8.398	4.55	2	-1.6	1	1	0	0	-1.994	0	1	-11.1
220	CHEMBL182099	C1CNCC=C1c2cn(c(c23)cccc3)S(=O)(=O)c4nccc(c45)snc5	5	8.301	3.26	2	-1.511	1	1	0	0	-2.032	0	3	-9.7
221	CHEMBL183203	c1cccc(c12)n(CCN(C)C)cc2S(=O)(=O)c3ccccc3	20	7.699	3.04	1	-2.031	1	1	0	0	-2.127	0	2	-8.3
222	CHEMBL1834221	CCC1C=NN(C1)C(\NCC)=N\S(=O)(=O)c2c(Cl)cccc2	27.8	7.556	2.32	2	-0.952	1	0	0	0	-1.141	0	3	-8.3
223	CHEMBL1834225	CCC1C=NN(C1)C(\NCC)=N\S(=O)(=O)c2ccccc2	33.9	7.47	1.67	2	-0.917	1	0	0	0	-1.107	0	3	-7.9
224	CHEMBL1834226	CCC1C=NN(C1)C(\NCC)=N\S(=O)(=O)c2cc(Cl)ccc2	8.75	8.058	2.32	2	-0.929	1	0	0	0	-1.117	0	3	-8.4
225	CHEMBL1834227	CCC1C=NN(C1)C(\NCCC)=N\S(=O)(=O)c2cc(Cl)ccc2	14.6	7.836	2.71	2	-0.93	1	0	0	0	-1.118	0	3	-8.4
226	CHEMBL1834228	CCC1C=NN(C1)C(\NC)=N\S(=O)(=O)c2cc(Cl)ccc2	17.8	7.75	1.93	2	-0.933	1	0	0	0	-1.123	0	3	-8.2
227	CHEMBL1834229	CCC1C=NN(C1)C(\N)=N\S(=O)(=O)c2cc(Cl)ccc2	24.2	7.616	1.67	0	-0.947	0	0	0	0	-1.16	0	3	-8.6
228	CHEMBL1834230	CC1C=NN(C1)C(\NCC)=N\S(=O)(=O)c2cc(Cl)ccc2	8	8.097	1.93	2	-0.933	1	0	0	0	-1.116	0	3	-8.2
229	CHEMBL1834231	N1=CCCN1C(\NCC)=N\S(=O)(=O)c2cc(Cl)ccc2	33.9	7.47	1.69	3	-0.927	1	0	0	0	-1.139	0	3	-8.2
230	CHEMBL1834234	c1ccc(Cl)cc1S(=O)(=O)/N=C(\NCC)N2N=CCC2c3ccccc3	23.9	7.622	3.43	3	-0.848	1	0	0	0	-1.618	0	3	-8.6
231	CHEMBL1834235	c1ccc(Cl)cc1S(=O)(=O)/N=C(\NCC)N2N=CC[C@H]2c3ccccc3	9.3	8.032	3.43	3	-0.858	1	0	0	0	-1.628	0	3	-9.1
232	CHEMBL1834238	c1ccc(Cl)cc1S(=O)(=O)/N=C(\NCC)N2N=CCC2c3ccco3	8.2	8.086	3.02	2	-0.821	1	0	0	0	-1.46	0	3	-8.8
233	CHEMBL1834240	CCC1C=NN(C1)C(\NCC)=N\S(=O)(=O)c2ccc(Cl)cc2	18.5	7.733	2.32	2	-0.935	1	0	0	0	-1.123	0	3	-8.1
234	CHEMBL1834241	c1ccc(cc1F)S(=O)(=O)/N=C(\NCC)N(C2)N=CC2CC	17	7.77	1.81	2	-0.795	1	0	0	0	-0.982	0	3	-8.4
235	CHEMBL1834242	CCC1C=NN(C1)C(\NCC)=N\S(=O)(=O)c(cc2C(F)(F)F)ccc2	17.9	7.747	2.69	2	-0.869	1	0	0	0	-1.054	0	3	-8.8
236	CHEMBL1834243	Cc1cc(ccc1)S(=O)(=O)/N=C(\NCC)N(C2)N=CC2CC	27.4	7.562	1.98	3	-0.889	1	0	0	0	-1.081	0	3	-8.6
237	CHEMBL1834332	CCC1C=NN(C1)C(\NCC)=N\S(=O)(=O)c(ccc2)cc2OC	26.6	7.575	1.68	2	-0.83	1	0	0	0	-1.032	1	3	-7.8
238	CHEMBL1834333	CCC1C=NN(C1)C(\NCC)=N\S(=O)(=O)c(c2)ccc(Cl)c2Cl	7.9	8.102	2.98	2	-0.965	1	0	0	0	-1.152	0	3	-8.3
239	CHEMBL1834334	CCC1C=NN(C1)C(\NCC)=N\S(=O)(=O)c2cc(Cl)cc(Cl)c2	21.9	7.66	2.98	2	-0.945	1	0	0	0	-1.131	0	3	-8.3
240	CHEMBL1834335	CCC1C=NN(C1)C(\NCC)=N\S(=O)(=O)c2c(Cl)ccc(Cl)c2	119.4	6.923	2.98	2	-0.967	1	0	0	0	-1.155	0	3	-8.4
241	CHEMBL1834338	CCC1C=NN(C1)C(\NCC)=N\S(=O)(=O)c2cccc(c23)cccc3	5.6	8.252	2.82	3	-1.035	1	0	0	0	-1.333	0	3	-9
242	CHEMBL1834339	CCC1C=NN(C1)C(\NCC)=N\S(=O)(=O)c(c2)ccc(c23)cccc3	17.2	7.764	2.82	2	-0.842	1	0	0	0	-1.326	0	3	-9.2
243	CHEMBL1834340	CCC1C=NN(C1)C(\NCC)=N\[S+]([O-])c(c2C)sc(c23)ccc(Cl)c3	8.5	8.071	4.18	3	-1.19	1	0	0	0	-1.398	0	3	-8.2
244	CHEMBL1834341	CCC1C=NN(C1)C(\NCC)=N\S(=O)(=O)c(c(n2)Cl)n(c23)ccs3	7.9	8.102	2.03	1	-1.701	1	0	0	0	-1.885	0	5	-8.1
245	CHEMBL1834342	CCC1C=NN(C1)C(\NCC)=N\S(=O)(=O)c2ccc(s2)Cl	4.1	8.387	2.38	2	-1.303	1	0	0	0	-1.493	0	3	-7.8
246	CHEMBL1834345	CC1(C)C=NN(C1)C(\NCC)=N\S(=O)(=O)c2cc(Cl)ccc2	24.1	7.618	2.32	2	-0.928	1	0	0	0	-1.081	0	3	-8.8
247	CHEMBL1834346	CCC1(CC)C=NN(C1)C(\NCC)=N\S(=O)(=O)c2cc(Cl)ccc2	49.9	7.302	3.1	1	-0.942	1	0	0	0	-1.098	0	3	-8.5
248	CHEMBL1834347	c1ccc(Cl)cc1S(=O)(=O)/N=C(\NCC)N(C2)N=CC23CCCC3	6.4	8.194	2.86	1	-0.938	1	0	0	0	-1.459	0	3	-9
249	CHEMBL1834348	c1ccc(Cl)cc1S(=O)(=O)/N=C(\NCC)N(C2)N=CC23CCCCC3	5.2	8.284	3.25	1	-0.944	1	0	0	0	-1.565	0	3	-9.2
250	CHEMBL1834349	c1ccc(Cl)cc1S(=O)(=O)/N=C(\NCC)N(C2)N=CC23CCOCC3	71.1	7.148	2.09	1	-0.946	1	0	0	0	-1.216	1	3	-8.9
251	CHEMBL1834350	c1ccc(Cl)cc1S(=O)(=O)/N=C(\NCC)N(C2)N=CC23CCNCC3	7.2	8.143	1.67	2	-0.95	2	0	0	0	-1.53	0	3	-9.3
252	CHEMBL1834351	FCC1(CF)C=NN(C1)C(\NCC)=N\S(=O)(=O)c2cc(Cl)ccc2	92	7.036	2.22	2	-0.931	1	0	0	0	-1.17	0	3	-8.7
253	CHEMBL184640	COc(cc1)cc(c12)n(CCN(C)C)cc2S(=O)(=O)c3ccccc3	23	7.638	3.04	1	-2.121	1	1	0	0	-2.024	1	2	-8.6
254	CHEMBL184652	c1cccc(c12)n(CCNC)cc2S(=O)(=O)c3cccc(c34)cccc4	5.7	8.244	3.85	3	-2.138	1	1	0	0	-2.339	0	1	-9.4
255	CHEMBL184671	c1cc(Cl)cc(c12)n(CCN(C)C)cc2S(=O)(=O)c3ccccc3	42	7.377	3.69	2	-2.01	1	1	0	0	-2.127	0	2	-8.5
256	CHEMBL185672	c1cccc(c12)n(CCN(C)C)cc2S(=O)(=O)c(cc3)ccc3C	57	7.244	3.34	1	-2.002	1	1	0	0	-2.098	0	2	-8.9
257	CHEMBL185850	c1ccc(OC)c(c12)n(CCN(C)C)cc2S(=O)(=O)c3ccccc3	25	7.602	3.04	1	-1.883	1	1	0	0	-2.016	1	2	-8.5
258	CHEMBL185958	c1cccc(c12)n(CCN(C)C)cc2S(=O)(=O)c3cccc(c34)cccc4	3.7	8.432	4.19	2	-2.146	1	1	0	0	-2.348	0	2	-9.6
259	CHEMBL186585	c1c(F)ccc(c12)n(CCN)cc2S(=O)(=O)c3ccccc3	27	7.569	2.57	2	-1.868	1	1	0	0	-1.994	0	1	-8.4
260	CHEMBL186621	c1cccc(c12)n(CCN(C)C)cc2Cc3ccccc3	32	7.495	3.79	2	0	1	0	0	0	-1.51	0	2	-8.2
261	CHEMBL187278	CNCCc1cn(c(c12)cccc2)S(=O)(=O)c3ccccc3	5	8.301	2.64	2	-1.479	1	1	0	0	-1.605	0	1	-8.7
262	CHEMBL188182	c1cccc(c12)n(CCN)cc2S(=O)(=O)c3ccccc3	25	7.602	2.43	2	-2.025	1	1	0	0	-2.12	0	1	-8.3
263	CHEMBL188285	N1CCC[C@H]1Cc2cn(c(c23)cccc3)S(=O)(=O)c4ccccc4	36.85	7.434	3.17	1	-1.48	1	1	0	0	-1.962	0	1	-9.2
264	CHEMBL188864	N1CCC[C@@H]1Cc2cn(c(c23)cccc3)S(=O)(=O)c4ccccc4	7.8	8.108	3.17	1	-1.478	1	1	0	0	-2.007	0	1	-9.7
265	CHEMBL191429	C1CNCCN1c2c(OC)ccc(c2)NS(=O)(=O)c3ccc(I)cc3	2.3	8.638	2.51	2	-1.312	1	0	0	0	-1.553	1	1	-8.8
266	CHEMBL1916745	c1cccc(OC)c1N(CC2)CCN2CCCN3C(=O)N(C)C(=O)C3(c4ccccc4)c5ccccc5	29070	4.537	4.05	7	0	1	1	1	1	-1.265	1	4	-10.8
267	CHEMBL1916746	c1ccccc1N(CC2)CCN2CC(O)CN3C(=O)N(C)C(=O)C3(c4ccccc4)c5ccccc5	20410	4.69	3.01	5	0	1	1	1	1	-1.448	0	4	-9.7
268	CHEMBL1917342	c1cccc(OC)c1N(CC2)CCN2CCCNS(=O)(=O)c(c3)ccc(c34)nccc4	825	6.084	2.73	8	-0.75	2	2	1	0	-1.694	1	3	-9.7
269	CHEMBL1917346	c1cccc(c12)CN(CC2)CCCCNS(=O)(=O)c(c3)cnc(c34)cccc4	590	6.229	3.35	6	-0.673	2	2	1	0	-1.628	0	2	-9.7
270	CHEMBL1922617	Cc(n1)c(Cl)c(N)n(c12)nc(NC)c2S(=O)(=O)c3cc(Cl)ccc3	18.62	7.73	2.8	0	-1.553	1	0	0	0	-1.876	0	3	-8.9
271	CHEMBL1922618	Cc(n1)cc(NC)n(c12)nc(NC)c2S(=O)(=O)c3ccccc3	0.5754	9.24	1.95	0	-1.54	2	0	0	0	-1.826	0	3	-8.3
272	CHEMBL1922623	C1COCCN1c(cc(n2)C)n(c23)nc(NC)c3S(=O)(=O)c4ccccc4	16.6	7.78	1.75	0	-1.531	1	0	0	0	-1.935	1	4	-9.3
273	CHEMBL1922624	CN1CCN(CC1)c(cc(n2)C)n(c23)nc(NC)c3S(=O)(=O)c4ccccc4	4.365	8.36	1.66	0	-1.564	2	0	0	0	-2.114	0	5	-9.8
274	CHEMBL1922625	Cc(n1)cc(CN)n(c12)nc(NC)c2S(=O)(=O)c3ccccc3	1.862	8.73	1.37	0	-1.662	2	1	0	0	-1.841	0	3	-8.2
275	CHEMBL1922626	Cc(n1)cc(CN(C)C)n(c12)nc(NC)c2S(=O)(=O)c3ccccc3	1.82	8.74	1.97	0	-1.641	2	1	0	0	-1.83	0	4	-8.7
276	CHEMBL1922627	Cc(n1)cc(CCN)n(c12)nc(NC)c2S(=O)(=O)c3ccccc3	3.09	8.51	1.41	0	-1.627	2	1	0	0	-1.846	0	3	-8.2
277	CHEMBL1922629	NCc(n1)cc(C)n(c12)nc(NC)c2S(=O)(=O)c3ccccc3	0.9772	9.01	1.37	0	-1.667	2	1	0	0	-1.849	0	3	-8.4
278	CHEMBL1922631	CC(=O)Nc(c(n1)C)c(C)n(c12)nc(NC)c2S(=O)(=O)c3ccccc3	4.677	8.33	2.18	0	-1.645	1	0	0	0	-1.83	0	3	-8.9
279	CHEMBL1922633	Cc(n1)c(CN)c(C)n(c12)nc(NC)c2S(=O)(=O)c3ccccc3	0.6457	9.19	1.68	0	-1.607	2	1	0	0	-1.782	0	3	-8.4
280	CHEMBL1922634	Cc(n1)c(CN)c(C)n(c12)nc(NC)c2S(=O)(=O)c(cc3F)ccc3	1.413	8.85	1.82	0	-1.472	2	1	0	0	-1.647	0	3	-8.7
281	CHEMBL1922636	CN(C)Cc(c(n1)C)c(C)n(c12)nc(NC)c2S(=O)(=O)c3ccccc3	0.7079	9.15	2.28	0	-1.616	2	1	0	0	-1.786	0	4	-8.5
282	CHEMBL1922637	CN(C)Cc(c(n1)C)c(C)n(c12)nc(NC)c2S(=O)(=O)c(cc3F)ccc3	0.8913	9.05	2.42	0	-1.481	2	1	0	0	-1.65	0	4	-8.8
283	CHEMBL1922639	NCCc(c(n1)C)c(C)n(c12)nc(NC)c2S(=O)(=O)c3ccccc3	1.38	8.86	1.72	0	-1.639	2	0	0	0	-1.808	0	3	-8.6
284	CHEMBL1922640	CN(C)CCc(c(n1)C)c(C)n(c12)nc(NC)c2S(=O)(=O)c3ccccc3	2.089	8.68	2.32	0	-1.641	2	0	0	0	-1.815	0	4	-8.6
285	CHEMBL1922641	c1ccccc1S(=O)(=O)c(c2NCC)ccc(c2)N3CCNCC3	2.7	8.569	2.36	3	-1.79	2	0	0	0	-2.208	0	1	-9.3
286	CHEMBL1922716	c1ccc(cc1F)S(=O)(=O)c(c2NC)ccc(c2)N3CCCNCC3	1.4	8.854	2.5	3	-1.612	2	0	0	0	-2.052	0	1	-9.4
287	CHEMBL193376	c1cc(N)ccc1/C=C/2C=Cc(c23)cccc3	640	6.194	3.84	3	0	0	0	0	0	-1.31	0	0	-8.4
288	CHEMBL193379	C1CNCCN1c2c(C#N)ccc(c23)n(cc3)S(=O)(=O)c4cc(Cl)ccc4	5.012	8.3	2.81	1	-1.435	1	0	0	0	-1.806	0	3	-9.6
289	CHEMBL193400	c1ccc(Cl)cc1S(=O)(=O)n(cc2)c(c23)ccc(Cl)c3N4CCNCC4	1.406	8.852	3.59	1	-1.488	1	0	0	0	-1.941	0	2	-10.1
290	CHEMBL193637	c1cc(N)ccc1CC(C=C2)c(c23)cccc3	4470	5.35	3.62	6	0	0	0	0	0	-1.392	0	0	-8.6
291	CHEMBL193657	N1CCC[C@H]1Cc2cn(c(c23)cccc3)S(=O)(=O)c4c(Br)cccc4	43	7.367	3.94	1	-1.475	1	1	0	0	-1.958	0	1	-9.7
292	CHEMBL193665	c1ccccc1S(=O)(=O)n(cc2)c(c23)ccc(Cl)c3N4CCNCC4	1.585	8.8	2.94	1	-1.413	1	0	0	0	-1.97	0	2	-9.3
293	CHEMBL193824	c1ccccc1S(=O)(=O)n(c(c23)cccc3)cc2C4=CCCNC4	4.6	8.337	3.26	2	-1.497	1	1	0	0	-1.993	0	1	-10.4
294	CHEMBL193841	c1cccc(c12)n(CCN(C)C)cc2Cc3ccc(N)cc3	50	7.301	3.38	2	0	1	0	0	0	-1.543	0	2	-8.5
295	CHEMBL194307	CN1CCC[C@@H]1Cc2cn(c(c23)cccc3)S(=O)(=O)c4ccccc4	2.225	8.653	3.52	1	-1.484	1	1	0	0	-1.945	0	2	-9.4
296	CHEMBL194311	N1CCC[C@H]1Cc2cn(c(c23)cccc3)S(=O)(=O)c4ccc(s4)Cl	25	7.602	3.89	1	-1.874	1	1	0	0	-2.352	0	1	-9
297	CHEMBL194360	c1cccc2n(c(c3c12)CNCC3)S(=O)(=O)c(cc4)ccc4N	116	6.936	2.11	3	-1.553	1	1	0	0	-1.762	0	1	-9.5
298	CHEMBL194465	N1CCC[C@H]1Cc2cn(c(c23)cccc3)S(=O)(=O)c(c4)ccc(OC)c4OC	23	7.638	3.19	2	-1.245	1	1	0	0	-1.723	2	1	-9.6
299	CHEMBL194568	Fc1ccc(cc1)S(=O)(=O)n(c(c23)cccc3)cc2C4=CCCNC4	10.5	7.979	3.39	2	-1.348	1	1	0	0	-1.795	0	1	-10.5
300	CHEMBL194750	COc1ccc(cc1)S(=O)(=O)n(c(c23)cccc3)cc2C4CCCNC4	10	8	3.35	1	-1.396	1	1	0	0	-1.89	1	1	-10
301	CHEMBL194834	N1CCC[C@H]1Cc2cn(c(c23)cccc3)S(=O)(=O)c4ccc(Cl)cc4	49	7.31	3.83	1	-1.507	1	1	0	0	-1.986	0	1	-9.7
302	CHEMBL194904	c1cccc(Cl)c1S(=O)(=O)n(c(c23)cccc3)cc2C4=CCCNC4	13	7.886	3.91	1	-1.5	1	1	0	0	-1.944	0	1	-10.3
303	CHEMBL1949963	c1cccc(c12)ncc(c2)S(=O)(=O)NCCCCN3CCN(CC3)c4cc(Cl)ccc4	139	6.857	3.77	9	-0.676	2	2	1	0	-1.841	0	3	-9.5
304	CHEMBL1949964	c1c(Cl)ccc(c12)ncc(c2)S(=O)(=O)NCCCCN3CCN(CC3)c4cc(Cl)ccc4	155	6.81	4.42	6	-0.671	2	2	1	0	-1.853	0	3	-10.2
305	CHEMBL1949965	c1ccnc(c12)ccc(c2)S(=O)(=O)NCCCCN3CCN(CC3)c4cc(Cl)ccc4	397	6.401	3.77	9	-0.749	2	2	1	0	-1.839	0	3	-9.3
306	CHEMBL1949967	c1cccc(c12)ncc(c2)S(=O)(=O)NCCCCN3CCN(CC3)c4ccc(Cl)cc4	339	6.47	3.77	7	-0.677	2	2	1	0	-1.837	0	3	-9.5
307	CHEMBL1949968	c1ccnc(c12)ccc(c2)S(=O)(=O)NCCCCN3CCN(CC3)c4ccc(Cl)cc4	1535	5.814	3.77	7	-0.748	2	2	1	0	-1.841	0	3	-9.8
308	CHEMBL1949970	c1cc(Cl)ccc1N(CC2)CCN2CCCCNS(=O)(=O)c3cncc(c34)cccc4	750	6.125	3.77	7	-0.798	2	2	1	0	-1.809	0	3	-9.5
309	CHEMBL1949972	c1ccc(Cl)cc1N(CC2)CCN2CCCCNS(=O)(=O)c3cccc(c34)cccc4	127	6.896	4.37	8	-0.963	2	2	1	0	-1.976	0	2	-10
310	CHEMBL1949973	c1cccc(c12)ccc(c2)S(=O)(=O)NCCCCN3CCN(CC3)c4cc(Cl)ccc4	147	6.833	4.37	6	-0.781	2	2	1	0	-1.971	0	2	-9.9
311	CHEMBL195018	CN1CCC[C@H]1Cc2cn(c(c23)cccc3)S(=O)(=O)c4cc(Cl)ccc4	4	8.398	4.17	1	-1.496	1	1	0	0	-1.957	0	2	-9.5
312	CHEMBL195317	CNCCC1=CC(c(c12)cccc2)CCc3ccccc3	100	7	4.41	5	0	1	0	0	0	-1.323	0	0	-8.8
313	CHEMBL195987	c1cccc2n(c(c3c12)CNCC3)S(=O)(=O)c4cc(Cl)ccc4	41.7	7.38	3.18	3	-1.506	1	1	0	0	-1.713	0	1	-10
314	CHEMBL196094	CN1CCC[C@H]1Cc2cn(c(c23)cccc3)S(=O)(=O)c4ccc(Cl)cc4	7	8.155	4.17	2	-1.508	1	1	0	0	-1.97	0	2	-9.5
315	CHEMBL196103	C1CNCCN1c2c(Cl)ccc(c23)n(cc3)S(=O)(=O)c4cccc(c45)cccc5	7.943	8.1	4.09	1	-1.587	1	0	0	0	-2.143	0	2	-10.1
316	CHEMBL196622	CN1CCC[C@@H]1Cc2cn(c(c23)cccc3)S(=O)(=O)c4ccc(s4)Br	4	8.398	4.34	1	-1.841	1	1	0	0	-2.296	0	2	-9.1
317	CHEMBL196644	c1c(Cl)ccc(c12)sc(c2C)S(=O)(=O)n(cc3)c(c34)cccc4N5CCNCC5	3.162	8.5	4.46	1	-1.883	1	0	0	0	-2.322	0	2	-10.3
318	CHEMBL196661	c1cccc(c1C(F)(F)F)S(=O)(=O)n(c(c23)cccc3)cc2C4=CCCNC4	21.7	7.664	4.27	1	-1.434	1	1	0	0	-1.873	0	1	-10.4
319	CHEMBL196743	FC(F)(F)c1ccc(cc1)S(=O)(=O)n(c(c23)cccc3)cc2C4CCCNC4	10	8	4.36	2	-1.435	1	1	0	0	-1.927	0	1	-10.6
320	CHEMBL196791	c1cc(Cl)ccc1S(=O)(=O)n(c(c23)cccc3)cc2C4=CCCNC4	22	7.658	3.91	2	-1.53	1	1	0	0	-2.023	0	1	-10.3
321	CHEMBL196792	COc1ccc(cc1)S(=O)(=O)n(c(c23)cccc3)cc2C4=CCCNC4	16	7.796	3.26	1	-1.398	1	1	0	0	-1.906	1	1	-10.1
322	CHEMBL196926	c1c(F)ccc(c1F)S(=O)(=O)n(c(c23)cccc3)cc2C4=CCCNC4	13	7.886	3.53	1	-1.221	1	1	0	0	-1.721	0	1	-10.8
323	CHEMBL197297	C1CNCCN1c(ccc2)c(c23)n(C)cc3S(=O)(=O)c4cc(Cl)ccc4	2.512	8.6	3.07	1	-1.994	1	0	0	0	-2.51	0	2	-9.8
324	CHEMBL197397	N1CCC[C@H]1Cc2cn(c(c23)cccc3)S(=O)(=O)c(cc4)ccc4OC	40	7.398	3.18	1	-1.399	1	1	0	0	-1.89	1	1	-9.3
325	CHEMBL197407	CN1CCC[C@H]1Cc2cn(c(c23)cccc3)S(=O)(=O)c(cc4)ccc4OC	19.3	7.714	3.52	2	-1.396	1	1	0	0	-1.858	1	2	-9.4
326	CHEMBL197574	C1CNCCN1c(ccc2)c(c23)occ3S(=O)(=O)c4ccccc4	1.259	8.9	2.68	1	-1.616	1	0	0	0	-2.056	0	1	-9.9
327	CHEMBL197845	Cc1cc(Cl)n(n1)CS(=O)(=O)n(c(c23)cccc3)cc2C4=CCCNC4	8	8.097	3.01	4	-1.172	1	1	0	0	-1.659	0	3	-9.6
328	CHEMBL198766	c1ccc(Cl)cc1S(=O)(=O)n(c(c23)cccc3)cc2C4=CCCNC4	14	7.854	3.91	2	-1.512	1	1	0	0	-2.005	0	1	-10.7
329	CHEMBL198827	CN1CCC[C@H]1Cc2cn(c(c23)cccc3)S(=O)(=O)c4ccc(I)cc4	3	8.523	4.12	1	-1.481	1	1	0	0	-1.941	0	2	-9.4
330	CHEMBL198941	CN1CCC[C@H]1Cc2cn(c(c23)cccc3)S(=O)(=O)c(c4)ccc(Cl)c4Cl	12	7.921	4.82	1	-1.543	1	1	0	0	-2.005	0	2	-9.6
331	CHEMBL2058415	C\N=C(\N1C)NC(=O)/C1=C\c2c[nH]c(c23)cccc3Br	1409	5.851	2.32	2	0	0	0	0	1	-0.793	1	2	-7.9
332	CHEMBL2058418	C\N=C(\N1C)NC(=O)/C1=C\c2c[nH]c(c23)c(Br)ccc3	2306	5.637	2.32	3	0	0	0	0	1	-0.83	1	2	-8.1
333	CHEMBL2058703	C\N=C(\N1)NC(=O)\C1=C\c2c[nH]c(c23)cccc3Br	3733	5.428	1.98	2	0	0	0	0	1	-0.883	1	1	-8.6
334	CHEMBL2058704	C\N=C(\N1)NC(=O)\C1=C\c2c[nH]c(c23)ccc(Br)c3	860	6.066	1.98	2	0	0	0	0	1	-0.887	1	1	-8.7
335	CHEMBL209383	NCCc1cc(ccc1)S(=O)(=O)c2ccccc2	50	7.301	2.02	3	-1.71	1	1	0	0	-1.71	0	0	-8
336	CHEMBL209909	NCc1cc(ccc1)NS(=O)(=O)c2ccccc2	290	6.538	1.95	4	-1.267	1	1	0	0	-1.344	0	0	-7.7
337	CHEMBL2103880	CN(C)CCCOc(c1)ccc(c12)[nH]nc2S(=O)(=O)c3cccc(c34)cccc4	1.3	8.886	3.88	2	-1.83	1	0	0	0	-2.085	1	2	-9.2
338	CHEMBL211577	C1CNCCN1c2ccc(cc2)S(=O)(=O)c3ccccc3	8.85	8.053	1.93	3	-1.764	1	0	0	0	-2.109	0	1	-9.2
339	CHEMBL211688	NCCc1cc(ccc1)Sc2ccccc2	115	6.939	3.34	3	-1.22	1	0	0	0	-1.22	0	0	-7.1
340	CHEMBL212063	NCCc1cc(ccc1)NS(=O)(=O)c2ccccc2	21	7.678	1.99	3	-1.256	1	1	0	0	-1.367	0	0	-7.7
341	CHEMBL212178	CN(C)CCc1cc(ccc1)NS(=O)(=O)c2ccccc2	52	7.284	2.59	3	-1.258	1	1	0	0	-1.359	0	1	-8.1
342	CHEMBL212227	CNCCc1cc(ccc1)NS(=O)(=O)c2ccccc2	38	7.42	2.25	4	-1.255	1	1	0	0	-1.355	0	0	-8.1
343	CHEMBL213586	C1CNCCN1c(ccc2)cc2NS(=O)(=O)c3ccccc3	62	7.208	1.9	3	-1.225	1	0	0	0	-1.701	0	1	-8.9
344	CHEMBL213589	NCCc1ccc(cc1)S(=O)(=O)c2ccccc2	37	7.432	2.02	2	-1.714	1	1	0	0	-1.714	0	0	-8.1
345	CHEMBL2159457	c1cccc(c1C(C)C)OCCN(CC2)CCC2CNS(=O)(=O)c(cc3)ccc3F	313	6.504	4.02	5	-0.99	2	2	1	0	-1.612	1	1	-9.3
346	CHEMBL2159458	c1ccccc1-c2c(cccc2)OCCN(CC3)CCC3CNS(=O)(=O)c(cc4)ccc4F	315	6.502	4.56	9	-0.997	2	2	1	0	-2.069	1	1	-10.6
347	CHEMBL2159459	c1ccc(F)cc1OCCN(CC2)CCC2CNS(=O)(=O)c(cc3)ccc3F	2124	5.673	3.03	8	-0.998	2	2	1	0	-1.516	1	1	-9.3
348	CHEMBL2159460	c1cccc(c1C(C)C)OCCN(CC2)CCC2CNS(=O)(=O)c3cc(Cl)ccc3	177	6.752	4.53	8	-1.146	2	2	1	0	-1.762	1	1	-9.3
349	CHEMBL2159461	c1cccc(SC)c1OCCN(CC2)CCC2CNS(=O)(=O)c3cc(Cl)ccc3	147	6.833	4.13	8	-1.671	2	2	1	0	-1.818	1	1	-8.7
350	CHEMBL2159462	c1ccc(F)cc1OCCN(CC2)CCC2CNS(=O)(=O)c3cc(Cl)ccc3	831	6.08	3.55	9	-1.149	2	2	1	0	-1.663	1	1	-9.5
351	CHEMBL2159463	c1cccc(OCC)c1C(=O)NC2CCN(CC2)CCOc3cc(F)ccc3	3785	5.422	3.5	9	0	2	1	1	0	-1.219	2	1	-8.8
352	CHEMBL2159464	c1ccccc1OCCN(CC2)CCC2NS(=O)(=O)c3cccs3	862	6.064	2.57	10	-1.55	2	2	1	0	-2.054	1	1	-8.3
353	CHEMBL2159465	c1cccc(c1C(C)C)OCCN(CC2)CCC2NS(=O)(=O)c(cc3)ccc3F	240	6.62	3.77	10	-1.086	2	2	1	0	-1.555	1	1	-9.8
354	CHEMBL2159466	c1ccccc1-c2c(cccc2)OCCN(CC3)CCC3NS(=O)(=O)c(c4)ccc(F)c4F	199	6.701	4.45	10	-0.936	2	2	1	0	-1.863	1	1	-10.9
355	CHEMBL2159467	c1ccc(F)c(F)c1C(=O)NC2CCN(C2)CCOc(cccc3)c3-c4ccccc4	1799	5.745	4.51	7	0	2	1	1	0	-1.508	1	1	-10.1
356	CHEMBL2159468	c1cccc(c12)nc(cc2)C(=O)NC3CCN(C3)CCOc(c4C(C)C)cccc4	1761	5.754	4.24	8	0	2	1	1	0	-1.505	1	2	-10.2
357	CHEMBL2159469	c1cccc(c12)nc(cc2)C(=O)NC3CCN(C3)CCOc(cccc4)c4-c5ccccc5	1335	5.875	4.78	6	0	2	1	1	0	-1.974	1	2	-10.6
358	CHEMBL2159470	c1cccc(c1C(C)C)OCCN(C2)CCC2NS(=O)(=O)c3cccs3	258	6.588	3.3	8	-1.478	2	2	1	0	-1.947	1	1	-8.8
359	CHEMBL2159471	c1ccccc1-c2c(cccc2)OCCN(C3)CCC3NS(=O)(=O)c4cccs4	267	6.573	3.85	6	-1.487	2	2	1	0	-2.384	1	1	-9.8
360	CHEMBL2159472	s1cccc1S(=O)(=O)NC2CCN(C2)CCOc3cccc(c34)CCCC4	102	6.991	3.06	8	-1.476	2	2	1	0	-2.202	1	1	-9.6
361	CHEMBL2159473	c1ccc(F)cc1OCCN(C2)CCC2NS(=O)(=O)c3cccs3	1779	5.75	2.32	10	-1.491	2	2	1	0	-1.861	1	1	-8.4
362	CHEMBL2159474	Clc1cccc(c1Cl)OCCN(C2)CCC2NS(=O)(=O)c3ccc(s3)Cl	91	7.041	4.14	9	-1.527	2	2	1	0	-2.068	1	1	-8.8
363	CHEMBL2159475	c1c(Cl)ccc(Cl)c1OCCN(C2)CCC2NS(=O)(=O)c3ccc(s3)Cl	225	6.648	4.14	10	-1.539	2	2	1	0	-2.063	1	1	-8.7
364	CHEMBL2159477	c1cccc(c1C(C)C)OCCN(C2)CCC2NS(=O)(=O)c(ccc3)c(c34)nccc4	504	6.298	3.79	6	-1.052	2	2	1	0	-1.671	1	2	-10.2
365	CHEMBL2159478	c1cccc(SC)c1OCCN(C2)CCC2NS(=O)(=O)c(cc3)ccc3F	357	6.447	2.98	7	-1.519	2	2	1	0	-1.519	1	1	-8.4
366	CHEMBL2159479	c1ccccc1OCCN(C2)CCC2NS(=O)(=O)c(cc3)ccc3F	248	6.606	2.26	7	-0.995	2	2	1	0	-1.501	1	1	-8.4
367	CHEMBL2159480	Fc1ccc(cc1)S(=O)(=O)NC2CCN(C2)CCOc3cccc(c34)CCCC4	96	7.018	3.14	9	-1.015	2	2	1	0	-1.746	1	1	-10.1
368	CHEMBL2159481	c1ccccc1-c2c(cccc2)OCCN(C3)CCC3NS(=O)(=O)c(c4)ccc(F)c4F	327	6.485	4.06	9	-0.871	2	2	1	0	-1.797	1	1	-10.6
369	CHEMBL2159482	c1ccc(F)cc1OCCN(C2)CCC2NS(=O)(=O)c(c3)ccc(F)c3F	951	6.022	2.54	6	-0.846	2	2	1	0	-1.211	1	1	-8.7
370	CHEMBL2159483	c1ccccc1-c2c(cccc2)OCCN(C3)CCC3NS(=O)(=O)c(c4F)cc(F)cc4	515	6.288	4.06	6	-0.867	2	2	1	0	-1.793	1	1	-10.4
371	CHEMBL2159484	C1CCCc(c12)cccc2OCCN(C3)CCC3NS(=O)(=O)c(c4F)cc(F)cc4	156	6.807	3.28	10	-0.858	2	2	1	0	-1.588	1	1	-10.2
372	CHEMBL2159485	c1cccc(c1C(C)C)OCCN(C2)CCC2NS(=O)(=O)c3cc(Cl)ccc3	245	6.611	3.9	6	-1.146	2	2	1	0	-1.612	1	1	-9.4
373	CHEMBL2159486	c1cccc(SC)c1OCCN(C2)CCC2NS(=O)(=O)c3cc(Cl)ccc3	185	6.733	3.49	9	-1.645	2	2	1	0	-1.645	1	1	-8.9
374	CHEMBL2159487	c1cccc(c1C(C)C)OCCN(C2)CC[C@H]2NS(=O)(=O)c3ccc(s3)Cl	200	6.699	3.96	9	-1.527	2	2	1	0	-1.997	1	1	-8.9
375	CHEMBL2159488	c1ccccc1-c2c(cccc2)OCCN(C3)CC[C@H]3NS(=O)(=O)c4ccc(s4)Cl	202	6.695	4.5	7	-1.515	2	2	1	0	-2.434	1	1	-9.6
376	CHEMBL2159489	c1ccccc1-c2c(cccc2)OCCN(C3)CC[C@H]3NS(=O)(=O)c(cc4)ccc4F	102	6.991	3.92	6	-0.999	2	2	1	0	-1.9	1	1	-10.2
377	CHEMBL2159490	c1cccc(c1C(C)C)OCCN(C2)CC[C@@H]2NS(=O)(=O)c3ccc(s3)Cl	537	6.27	3.96	6	-1.516	2	2	1	0	-1.954	1	1	-9
378	CHEMBL2159492	c1ccccc1-c2c(cccc2)OCCN(C3)CC[C@@H]3NS(=O)(=O)c(cc4)ccc4F	271	6.567	3.92	5	-0.996	2	2	1	0	-1.903	1	1	-10.1
379	CHEMBL2163369	CN(C)C(C1)CCc(c1c23)n(c2ccc(c3)OC)S(=O)(=O)c(cc4)ccc4OC	19.8	7.703	3.31	1	-1.635	1	1	0	0	-1.624	2	2	-9.9
380	CHEMBL2163739	FC(F)(F)c1cc(ccc1)S(=O)(=O)n(c2cccc3)c(c4c23)CCC(C4)N	73.4	7.134	3.71	2	-1.586	1	1	0	0	-1.794	0	1	-11.5
381	CHEMBL2163740	FC(F)(F)c1cc(ccc1)S(=O)(=O)n(c(c2c34)CCC(C2)N)c3ccc(c4)OC	39.1	7.408	3.72	2	-1.693	1	1	0	0	-1.71	1	1	-11.7
382	CHEMBL2165523	CN(C)C(C1)CCc(c1c23)n(c2cccc3)S(=O)(=O)c4ccccc4	8.82	8.055	3.3	3	-1.627	1	1	0	0	-1.808	0	2	-10.3
383	CHEMBL2165525	CN(C)C(C1)CCc(c1c23)n(c2ccc(Cl)c3)S(=O)(=O)c4ccccc4	16.1	7.793	3.95	0	-1.612	1	1	0	0	-1.811	0	2	-10
384	CHEMBL2165526	CN(C)C(C1)CCc(c1c23)n(c2ccc(F)c3)S(=O)(=O)c4ccccc4	15.7	7.804	3.44	1	-1.649	1	1	0	0	-1.662	0	2	-10.3
385	CHEMBL2165527	CN(C)C(C1)CCc(c1c23)n(c2ccc(c3)OC)S(=O)(=O)c4ccccc4	5.44	8.264	3.31	1	-1.726	1	1	0	0	-1.712	1	2	-10.5
386	CHEMBL2165528	CN(C)C(C1)CCc(c1c23)n(c2ccc(c3)SC)S(=O)(=O)c4ccccc4	4.57	8.34	4.02	0	-1.785	1	1	0	0	-1.842	0	2	-10.1
387	CHEMBL2165529	CN(C)C(C1)CCc(c1c23)n(c2c(F)cc(F)c3)S(=O)(=O)c4ccccc4	7.95	8.1	3.58	1	-1.526	1	1	0	0	-1.512	0	2	-11
388	CHEMBL2165530	CN(C)C(C1)CCc(c1c23)n(c2cccc3)S(=O)(=O)c4ccc(Br)cc4	15.5	7.81	4.06	2	-1.597	1	1	0	0	-1.778	0	2	-10.3
389	CHEMBL2165531	CN(C)C(C1)CCc(c1c23)n(c2ccc(Cl)c3)S(=O)(=O)c4ccc(Br)cc4	41.1	7.386	4.71	1	-1.576	1	1	0	0	-1.773	0	2	-10.2
390	CHEMBL2165532	CN(C)C(C1)CCc(c1c23)n(c2ccc(F)c3)S(=O)(=O)c4ccc(Br)cc4	43.5	7.362	4.2	2	-1.623	1	1	0	0	-1.635	0	2	-10.3
391	CHEMBL2165533	CN(C)C(C1)CCc(c1c23)n(c2ccc(c3)OC)S(=O)(=O)c4ccc(Br)cc4	15.1	7.821	4.07	1	-1.698	1	1	0	0	-1.685	1	2	-10.4
392	CHEMBL2165535	CN(C)C(C1)CCc(c1c23)n(c2ccc(F)c3)S(=O)(=O)c(cc4)ccc4F	32.8	7.484	3.58	1	-1.534	1	1	0	0	-1.546	0	2	-10.6
393	CHEMBL2165536	CN(C)C(C1)CCc(c1c23)n(S(=O)(=O)c(cc4)ccc4F)c2ccc(c3)OC	24.3	7.614	3.44	1	-1.576	1	1	0	0	-1.562	1	2	-10.6
394	CHEMBL2165537	CN(C)C(C1)CCc(c1c23)n(S(=O)(=O)c(cc4)ccc4F)c2ccc(c3)SC	24.9	7.604	4.16	0	-1.651	1	1	0	0	-1.707	0	2	-10.4
395	CHEMBL2165538	CN(C)C(C1)CCc(c1c23)n(c2cccc3)S(=O)(=O)c4cc(Cl)ccc4	4.21	8.376	3.95	1	-1.647	1	1	0	0	-1.823	0	2	-10.6
396	CHEMBL2165539	CN(C)C(C1)CCc(c1c23)n(c2ccc(F)c3)S(=O)(=O)c4cc(Cl)ccc4	5.01	8.3	4.09	1	-1.662	1	1	0	0	-1.671	0	2	-10.8
397	CHEMBL2165540	CN(C)C(C1)CCc(c1c23)n(c2ccc(c3)SC)S(=O)(=O)c4cc(Cl)ccc4	2.68	8.572	4.67	0	-1.807	1	1	0	0	-1.864	0	2	-10.5
398	CHEMBL2165543	FC(F)(F)c1cc(ccc1)S(=O)(=O)n(c2ccc(Cl)c3)c(c4c23)CCC(C4)N(C)C	12.2	7.914	4.97	2	-1.556	1	1	0	0	-1.751	0	2	-11.3
399	CHEMBL2165544	COc(c1)ccc2n(S(=O)(=O)c(cc3C(F)(F)F)ccc3)c(c4c12)CCC(C4)N(C)C	3.71	8.431	4.32	1	-1.663	1	1	0	0	-1.644	1	2	-11
400	CHEMBL2165545	CN(C)C(C1)CCc(c1c23)n(c2cccc3)S(=O)(=O)c4c(Br)cccc4	2.85	8.545	4.06	1	-1.628	1	1	0	0	-1.804	0	2	-10.3
401	CHEMBL2165546	CN(C)C(C1)CCc(c1c23)n(c2ccc(Cl)c3)S(=O)(=O)c4c(Br)cccc4	8.13	8.09	4.71	2	-1.599	1	1	0	0	-1.796	0	2	-10.4
402	CHEMBL2165547	CN(C)C(C1)CCc(c1c23)n(c2ccc(F)c3)S(=O)(=O)c4c(Br)cccc4	5.02	8.299	4.2	1	-1.647	1	1	0	0	-1.655	0	2	-10.3
403	CHEMBL2165548	CN(C)C(C1)CCc(c1c23)n(c2ccc(c3)OC)S(=O)(=O)c4c(Br)cccc4	4.3	8.367	4.07	1	-1.72	1	1	0	0	-1.707	1	2	-10.2
404	CHEMBL2165549	CN(C)C(C1)CCc(c1c23)n(c2cccc3)S(=O)(=O)c4c(Cl)cccc4	9.15	8.039	3.95	2	-1.648	1	1	0	0	-1.827	0	2	-10.5
405	CHEMBL2165550	CN(C)C(C1)CCc(c1c23)n(c2ccc(c3)OC)S(=O)(=O)c4c(Cl)cccc4	4.68	8.33	3.96	1	-1.755	1	1	0	0	-1.741	1	2	-10.6
406	CHEMBL2165551	CN(C)C(C1)CCc(c1c23)n(c2cccc3)S(=O)(=O)c(c4F)cccc4	10.4	7.983	3.44	2	-1.51	1	1	0	0	-1.688	0	2	-10.4
407	CHEMBL2165552	CN(C)C(C1)CCc(c1c23)n(c2ccc(c3)OC)S(=O)(=O)c(c4F)cccc4	3.63	8.44	3.44	1	-1.592	1	1	0	0	-1.579	1	2	-10.3
408	CHEMBL2165553	Cc1ccc(cc1)S(=O)(=O)n(c2cccc3)c(c4c23)CCC(C4)N(C)C	8.28	8.082	3.61	1	-1.603	1	1	0	0	-1.779	0	2	-10.5
409	CHEMBL2165554	Cc1ccc(cc1)S(=O)(=O)n(c2ccc(Cl)c3)c(c4c23)CCC(C4)N(C)C	18.09	7.743	4.26	1	-1.59	1	1	0	0	-1.782	0	2	-10.8
410	CHEMBL2165555	Cc1ccc(cc1)S(=O)(=O)n(c2ccc(F)c3)c(c4c23)CCC(C4)N(C)C	32.4	7.489	3.74	1	-1.634	1	1	0	0	-1.647	0	2	-11
411	CHEMBL2165556	Cc1ccc(cc1)S(=O)(=O)n(c2ccc(c3)SC)c(c4c23)CCC(C4)N(C)C	13.8	7.86	4.33	0	-1.763	1	1	0	0	-1.818	0	2	-10.5
412	CHEMBL2165557	Cc1ccc(cc1)S(=O)(=O)n(c2ccc(c3)OC)c(c4c23)CCC(C4)N(C)C	5.89	8.23	3.61	1	-1.71	1	1	0	0	-1.695	1	2	-11
413	CHEMBL2165559	CC(C)c1ccc(cc1)S(=O)(=O)n(c2ccc(F)c3)c(c4c23)CCC(C4)N(C)C	15.5	7.81	4.56	1	-1.638	1	1	0	0	-1.649	0	2	-10.2
414	CHEMBL2165560	CN(C)C(C1)CCc(c1c23)n(c2cccc3)S(=O)(=O)c(cc4)ccc4OC	20.4	7.69	3.31	2	-1.537	1	1	0	0	-1.72	1	2	-9.8
415	CHEMBL2165561	CN(C)C(C1)CCc(c1c23)n(c2ccc(Br)c3)S(=O)(=O)c(cc4)ccc4OC	28.99	7.538	4.07	1	-1.478	1	1	0	0	-1.66	1	2	-9.6
416	CHEMBL2165562	CN(C)C(C1)CCc(c1c23)n(c2ccc(c3)SC)S(=O)(=O)c(cc4)ccc4OC	6.89	8.162	4.03	1	-1.685	1	1	0	0	-1.742	1	2	-9.4
417	CHEMBL2165564	CN(C)C(C1)CCc(c1c23)n(c2ccc(Br)c3)S(=O)(=O)c(c(F)c4F)ccc4F	61.21	7.213	4.48	0	-1.14	1	1	0	0	-1.314	0	2	-10.9
418	CHEMBL2165565	CN(C)C(C1)CCc(c1c23)n(c2ccc(Br)c3)S(=O)(=O)c(c4)ccc(F)c4F	29.01	7.537	4.34	1	-1.278	1	1	0	0	-1.458	0	2	-10.7
419	CHEMBL2165566	FC(F)(F)c1cc(ccc1)S(=O)(=O)n(c2cccc3)c(c4c23)CCC(C4)NC	17.12	7.766	3.97	2	-1.588	1	1	0	0	-1.783	0	1	-11.5
420	CHEMBL2165567	COc(c1)ccc2n(S(=O)(=O)c(cc3C(F)(F)F)ccc3)c(c4c12)CCC(C4)NC	13.1	7.883	3.98	2	-1.681	1	1	0	0	-1.682	1	1	-11.2
421	CHEMBL2172183	C1CN(C)Cc(cn2)c1n(c23)nc(SC)c3S(=O)(=O)c4ccccc4	11.25	7.949	2.27	0	-1.81	1	1	0	0	-2.093	0	4	-9.1
422	CHEMBL2172184	C1CN(C)Cc(cn2)c1n(c23)nc(SC)c3S(=O)(=O)c(cc4)ccc4F	35.7	7.447	2.41	0	-1.672	1	1	0	0	-1.955	0	4	-9.4
423	CHEMBL2172185	C1CNCc(cn2)c1n(c23)nc(NC)c3S(=O)(=O)c4ccccc4	1.9	8.721	1.25	0	-1.675	2	1	0	0	-2.009	0	3	-9.1
424	CHEMBL2172186	C1CN(C)Cc(cn2)c1n(c23)nc(NC)c3S(=O)(=O)c4ccccc4	1.095	8.961	1.59	0	-1.675	2	1	0	0	-1.985	0	4	-9.3
425	CHEMBL2172187	C1CN(C)Cc(c(n2)C)c1n(c23)nc(NC)c3S(=O)(=O)c4ccccc4	0.68	9.167	1.9	0	-1.642	2	1	0	0	-1.952	0	4	-9.7
426	CHEMBL2172191	c1ccccc1S(=O)(=O)c2c(NC)nn(c23)cc4c(n3)CCNC4	2.1	8.678	1.25	0	-1.696	2	1	0	0	-2.025	0	3	-9.1
427	CHEMBL2172192	c1ccccc1S(=O)(=O)c2c(NC)nn(c23)cc4c(n3)CCN(C)C4	7.56	8.121	1.59	0	-1.701	2	1	0	0	-2.007	0	4	-8.6
428	CHEMBL2172193	CN(C1)CCc(n2)c1c(C)n(c23)nc(NC)c3S(=O)(=O)c4ccccc4	0.66	9.18	1.9	0	-1.641	2	1	0	0	-1.963	0	4	-9.1
429	CHEMBL220566	c1ccccc1S(=O)(=O)n(cc2CCN(C)C)c(c23)cccc3OC	11	7.959	2.99	1	-1.313	1	1	0	0	-1.471	1	2	-8.9
430	CHEMBL2207371	C1CN(C)CCN1Cc2cccc(c23)n(cc3)S(=O)(=O)c(cc4)ccc4F	9.89	8.005	2.76	1	-1.328	2	1	1	0	-1.819	0	3	-10
431	CHEMBL2207372	CC(C)c1ccc(cc1)S(=O)(=O)n(cc2)c(c23)cccc3CN4CCN(C)CC4	11.13	7.954	3.75	1	-1.466	2	1	1	0	-1.874	0	3	-10.5
432	CHEMBL2207373	C1CN(C)CCN1Cc2cccc(c23)n(cc3)S(=O)(=O)c4cc(Cl)ccc4	13.17	7.88	3.28	2	-1.506	2	1	1	0	-1.91	0	3	-10.6
433	CHEMBL2207374	C1CN(C)CCN1Cc2cccc(c23)n(cc3)S(=O)(=O)c4ccc(Br)cc4	23.41	7.631	3.39	1	-1.467	2	1	1	0	-1.873	0	3	-10.6
434	CHEMBL2207375	C1CN(C)CCN1Cc2cccc(c23)n(cc3)S(=O)(=O)c(cc4)ccc4OC	29.15	7.535	2.63	0	-1.368	2	1	1	0	-1.798	1	3	-9.9
435	CHEMBL2207376	C1CN(C)CCN1Cc2cccc(c23)n(cc3Cl)S(=O)(=O)c4cc(Cl)ccc4	27.19	7.566	3.93	0	-1.487	2	1	1	0	-1.921	0	3	-10.8
436	CHEMBL2207377	C1CN(C)CCN1Cc2cccc(c23)n(cc3Cl)S(=O)(=O)c4ccccc4	53.62	7.271	3.28	1	-1.504	2	1	1	0	-1.921	0	3	-10.2
437	CHEMBL2207382	C1CN(C)CCN1Cc2cccc(c23)n(cc3Br)S(=O)(=O)c4ccccc4	30.28	7.519	3.39	1	-1.458	2	1	1	0	-1.893	0	3	-10.5
438	CHEMBL2207383	C1CN(C)CCN1Cc2cccc(c23)n(cc3Br)S(=O)(=O)c4cc(Cl)ccc4	75.3	7.123	4.04	1	-1.434	2	1	1	0	-1.869	0	3	-10.9
439	CHEMBL2207387	C1CN(C)CCN1Cc2cccc(c23)n(cc3)S(=O)(=O)c4cccc(c45)cccc5	4.82	8.317	3.78	2	-1.652	2	1	1	0	-2.161	0	3	-10.6
440	CHEMBL2207388	C1CN(C)CCN1Cc2cccc(c23)n(cc3)S(=O)(=O)c4ccccc4	3.24	8.489	2.63	1	-1.463	2	1	1	0	-1.894	0	3	-10.2
441	CHEMBL2207389	C1CN(C)CCN1Cc2cccc(c23)n(cc3)S(=O)(=O)c(cc4)ccc4C	7.92	8.101	2.93	2	-1.444	2	1	1	0	-1.877	0	3	-10.4
442	CHEMBL2207768	C1CN(C)CCN1Cc2cccc(c23)n(cc3)S(=O)(=O)c4c(Br)cc(cc4)OC	8.58	8.067	3.4	2	-1.391	2	1	1	0	-1.802	1	3	-9.9
443	CHEMBL223637	CN(C)CCc1cn(c(c12)cc(cc2)OC)S(=O)(=O)c3ccccc3	15	7.824	2.99	2	-1.298	1	1	0	0	-1.498	1	2	-8.8
444	CHEMBL2260372	NCCc1c[nH]c(c12)ccnc2	64	7.194	1.06	4	0	1	0	0	0	-0.851	0	1	-5.7
445	CHEMBL2260373	CN(C)CCc1c[nH]c(c12)ccnc2	100	7	1.67	5	0	1	0	0	0	-0.832	0	2	-5.7
446	CHEMBL2260374	CN(C)CCc1cn(c(c12)ccnc2)S(=O)(=O)c3ccccc3	84	7.076	2.38	1	-1.461	1	1	0	0	-1.461	0	3	-8.2
447	CHEMBL2260375	c1nccc(c12)n(cc2C)S(=O)(=O)c(cc3)ccc3N	41	7.387	2.16	2	-1.541	0	0	0	0	-1.541	0	2	-8.1
448	CHEMBL2260377	c1ccccc1-c(c2CCN(C)C)[nH]c(c23)ccnc3	270	6.569	3.33	5	0	1	0	0	0	-1.254	0	2	-7.8
449	CHEMBL2312637	c1ccnc(c12)cc(cc2)S(=O)(=O)NCCCCN3CCN(CC3)c(c4Cl)cccc4Cl	301	6.521	4.42	7	-0.711	2	2	1	0	-1.895	0	3	-9.9
450	CHEMBL2312638	Clc1cccc(c1Cl)N(CC2)CCN2CCCCNS(=O)(=O)c3cccc(c34)cccn4	598	6.223	4.42	6	-0.768	2	2	1	0	-1.851	0	3	-9.6
451	CHEMBL2312639	c1cccc(c12)cnc(c2)S(=O)(=O)NCCCCN3CCN(CC3)c(c4Cl)cccc4Cl	454	6.343	4.42	6	-0.759	2	2	1	0	-1.945	0	3	-10.1
452	CHEMBL2312640	Clc1cccc(c1Cl)N(CC2)CCN2CCCCNS(=O)(=O)c3cncc(c34)cccc4	220	6.658	4.42	6	-0.795	2	2	1	0	-1.806	0	3	-9.8
453	CHEMBL2312642	Clc1cccc(c1Cl)N(CC2)CCN2CCCNS(=O)(=O)c(c3)ccc(c34)nccc4	326	6.487	4.03	9	-0.753	2	2	1	0	-1.867	0	3	-10.1
454	CHEMBL2312934	c1ccnc(c12)cc(cc2)S(=O)(=O)NCCCN3CCN(CC3)c(c4Cl)cccc4Cl	257	6.59	4.03	7	-0.716	2	2	1	0	-1.906	0	3	-10
455	CHEMBL2312935	c1cccc(c12)ncc(c2)S(=O)(=O)NCCCCN3CCN(CC3)c(c4Cl)cccc4Cl	1331	5.876	4.42	7	-0.673	2	2	1	0	-1.872	0	3	-9.9
456	CHEMBL2312937	c1ccnc(c12)ccc(c2)S(=O)(=O)NCCCCN3CCN(CC3)c(c4Cl)cccc4Cl	484	6.315	4.42	9	-0.75	2	2	1	0	-1.872	0	3	-9.9
457	CHEMBL235070	C1NCCCC1n(c(c23)nccc3)cc2S(=O)(=O)c4ccccc4	4.9	8.31	2.79	1	-2.064	1	1	0	0	-2.565	0	2	-9.1
458	CHEMBL235117	CN(C1)CCCC1n(c(c23)nccc3)cc2S(=O)(=O)c4cc(Cl)cc(Cl)c4	3.9	8.409	4.44	2	-2.088	1	1	0	0	-2.517	0	3	-9.5
459	CHEMBL235118	C1NCCCC1n(c(c23)nccc3)cc2S(=O)(=O)c4ccc(s4)Cl	1.2	8.921	3.51	1	-2.394	1	1	0	0	-2.855	0	2	-9.1
460	CHEMBL235306	C1NCCCC1n(c(c23)nccc3)cc2S(=O)(=O)c4cc(Br)ccc4	3.8	8.42	3.56	2	-2.002	1	1	0	0	-2.464	0	2	-10.1
461	CHEMBL235734	CCN(C1)CCCC1n(c(c23)nccc3)cc2S(=O)(=O)c(cc4F)ccc4	4.4	8.357	3.67	1	-1.92	1	1	1	0	-2.354	0	3	-9.7
462	CHEMBL235985	c1cccc(c12)n(cc2CCN)S(=O)(=O)c3c(Br)cccc3	11	7.959	3.14	1	-1.454	1	1	0	0	-1.58	0	1	-8.3
463	CHEMBL235986	c1cccc(c12)n(cc2CCN)S(=O)(=O)c3cc(Cl)ccc3	6	8.222	3.03	3	-1.495	1	1	0	0	-1.62	0	1	-8.9
464	CHEMBL235987	c1cccc(c12)n(cc2CCN)S(=O)(=O)c3ccc(I)cc3	14	7.854	2.98	2	-1.482	1	1	0	0	-1.607	0	1	-9
465	CHEMBL236103	C1NCCC1n(c(c23)nccc3)cc2S(=O)(=O)C(=C(Cl)N4)N(C45)C=CS5	1	9	2.12	2	-2.486	2	1	0	0	-2.848	0	3	-8.7
466	CHEMBL236104	C1NCCCC1n(c(c23)nccc3)cc2S(=O)(=O)C(=C(Cl)N4)N(C45)C=CS5	0.7	9.155	2.51	2	-2.517	2	1	0	0	-3.004	0	3	-9.3
467	CHEMBL236313	CN(C1)CCCC1n(c(c23)nccc3)cc2S(=O)(=O)C(=C(Cl)N4)N(C45)C=CS5	2	8.699	2.85	1	-2.504	2	1	0	0	-2.936	0	4	-9.9
468	CHEMBL236314	CC(C)N(C1)CCCC1n(c(c23)nccc3)cc2S(=O)(=O)C(=C(Cl)N4)N(C45)C=CS5	1.7	8.77	3.63	1	-2.478	2	1	0	0	-2.909	0	4	-9.6
469	CHEMBL236334	CN(C1)CCC1n(c(c23)nccc3)cc2S(=O)(=O)c4c(Cl)cccc4	2.2	8.658	3.4	1	-2.076	1	1	0	0	-2.411	0	3	-9.3
470	CHEMBL236335	CN(C1)CCC1n(c(c23)nccc3)cc2S(=O)(=O)c4cc(Cl)ccc4	1.5	8.824	3.4	2	-2.06	1	1	0	0	-2.393	0	3	-9.2
471	CHEMBL236405	C1NCCC1n(c(c23)nccc3)cc2S(=O)(=O)c4ccc(Br)cc4	4.3	8.367	3.17	1	-2.019	1	1	0	0	-2.374	0	2	-9.9
472	CHEMBL236540	CCN(C1)CCC1n(c(c23)nccc3)cc2S(=O)(=O)c4ccccc4	11	7.959	3.14	2	-2.051	1	1	1	0	-2.384	0	3	-8.9
473	CHEMBL236571	CC(C)N(C1)CCCC1n(c(c23)nccc3)cc2S(=O)(=O)c4cc(Br)ccc4	9.4	8.027	4.68	3	-2.014	1	1	0	0	-2.437	0	3	-10
474	CHEMBL236576	C1NCCC1n(c(c23)nccc3)cc2S(=O)(=O)c(cc4)ccc4F	8.5	8.071	2.54	2	-1.929	1	1	0	0	-2.31	0	2	-9.7
475	CHEMBL236577	C1NCCC1n(c(c23)nccc3)cc2S(=O)(=O)c4cc(Cl)ccc4	1.5	8.824	3.06	2	-2.076	1	1	0	0	-2.459	0	2	-9.9
476	CHEMBL236578	CN(C1)CCC1n(c(c23)nccc3)cc2S(=O)(=O)c(c4F)cccc4	5.6	8.252	2.88	1	-1.915	1	1	0	0	-2.248	0	3	-9.3
477	CHEMBL236579	CN(C1)CCC1n(c(c23)nccc3)cc2S(=O)(=O)c(cc4)ccc4F	5	8.301	2.88	1	-1.921	1	1	0	0	-2.253	0	3	-9.3
478	CHEMBL236772	FC(F)(F)c1cc(ccc1)S(=O)(=O)c2cn(c(c23)nccc3)C4CCCNC4	4.6	8.337	3.81	2	-2.048	1	1	0	0	-2.537	0	2	-10.9
479	CHEMBL236812	CN(C1)CCCC1n(c(c23)nccc3)cc2S(=O)(=O)c4ccc(s4)Cl	1.9	8.721	3.85	1	-2.414	1	1	0	0	-2.846	0	3	-9.1
480	CHEMBL236976	FC(F)(F)c1ccc(cc1)S(=O)(=O)c2cn(c(c23)nccc3)C4CCCNC4	12	7.921	3.81	2	-2.045	1	1	0	0	-2.533	0	2	-9.9
481	CHEMBL236986	c1cccc(c12)n(cc2CCN)S(=O)(=O)c(cc3)ccc3OC	47	7.328	2.39	3	-1.392	1	1	0	0	-1.517	1	1	-8.4
482	CHEMBL236988	c1cccc(c12)n(cc2CCN)S(=O)(=O)c(c3)ccc(OC)c3OC	7	8.155	2.4	2	-1.257	1	1	0	0	-1.382	2	1	-8.4
483	CHEMBL236989	c1cccc(c12)n(cc2CCN)S(=O)(=O)c3ccc(s3)Cl	6	8.222	3.09	2	-1.866	1	1	0	0	-1.992	0	1	-8.3
484	CHEMBL236990	c1cccc(c12)n(cc2CCN)S(=O)(=O)c3ccc(s3)Br	7	8.155	3.2	0	-1.838	1	1	0	0	-1.965	0	1	-8.3
485	CHEMBL237179	CCN(C1)CCCC1n(c(c23)nccc3)cc2S(=O)(=O)c4ccc(Cl)cc4	33.5	7.475	4.18	1	-2.072	1	1	1	0	-2.503	0	3	-9.6
486	CHEMBL237389	CC(C)N(C1)CCCC1n(c(c23)nccc3)cc2S(=O)(=O)c4ccc(Cl)cc4	11.1	7.955	4.57	2	-2.073	1	1	0	0	-2.52	0	3	-10.2
487	CHEMBL237593	C1NCCCC1n(c(c23)nccc3)cc2S(=O)(=O)c4ccc(Cl)cc4	7.6	8.119	3.45	1	-2.084	1	1	0	0	-2.584	0	2	-9.5
488	CHEMBL237594	CN(C1)CCCC1n(c(c23)nccc3)cc2S(=O)(=O)c4ccc(Cl)cc4	11.5	7.939	3.79	2	-2.077	1	1	0	0	-2.506	0	3	-9.4
489	CHEMBL2377443	c1cccc(c12)[nH]cc2C(C3=O)CC(=O)N3CCCN(CC4)CCC4c5c[nH]c(c56)ccc(c6)OC	264	6.578	4.77	6	0	1	1	1	0	-1.743	1	2	-11.9
490	CHEMBL2377445	c1cccc(c12)[nH]cc2C(C3=O)CC(=O)N3CCN(CC4)CCC4c5c[nH]c(c56)ccc(F)c6	1146	5.941	4.51	6	0	1	1	1	0	-1.734	0	2	-11.8
491	CHEMBL238277	c1cccc(c12)n(cc2CCN)S(=O)(=O)c3ccc(Cl)cc3	10	8	3.03	3	-1.501	1	1	0	0	-1.625	0	1	-9
492	CHEMBL238770	c1cccc(c12)n(cc2CCN)S(=O)(=O)C3=CN(C)C(S3)N	10	8	1.04	2	-1.543	2	2	0	0	-1.67	0	2	-7.5
493	CHEMBL240922	C1NCCC1n(c(c23)nccc3)cc2S(=O)(=O)c(c4F)cccc4	2	8.699	2.54	1	-1.917	1	1	0	0	-2.275	0	2	-9.6
494	CHEMBL2413985	c1cccc(c1NC)S(=O)(=O)c2ccccc2	24.3	7.614	2.56	3	-1.768	1	0	0	0	-1.768	0	0	-7.5
495	CHEMBL2413988	c1ccccc1S(=O)(=O)c(c2N(C)C)ccc(c2)N3CCNCC3	30.1	7.521	2	3	-1.669	1	0	0	0	-2.07	0	2	-9.2
496	CHEMBL2413989	c1ccccc1S(=O)(=O)c(c2N)ccc(c2)N3CCNCC3	1.65	8.783	1.51	3	-1.808	1	0	0	0	-2.155	0	1	-9.1
497	CHEMBL2413991	c1ccccc1S(=O)(=O)c(c2NC(=O)C)ccc(c2)N3CCNCC3	8.3	8.081	1.89	3	-1.742	1	0	0	0	-2.144	0	1	-9.8
498	CHEMBL2442272	N=C(N1)NC(=O)/C1=C\c2c[nH]c(c23)ccc(Br)c3	742	6.13	1.93	2	0	0	0	0	1	-0.869	0	0	-8.4
499	CHEMBL2442274	N=C(N1)NC(=O)/C1=C\c2c[nH]c(c23)c(Br)ccc3	1405	5.852	1.93	3	0	0	0	0	1	-0.876	0	0	-8.5
500	CHEMBL2448158	CN(C)C(C1)CCc(c1c23)n(c2cccc3)S(=O)(=O)c(cc4)ccc4F	12.5	7.903	3.44	1	-1.487	1	1	0	0	-1.666	0	2	-10.5
501	CHEMBL245806	c1cccc(c12)n(S(=O)(=O)CCC)cc2CCN(C)C	280	6.553	2.33	1	-0.615	1	1	0	0	-0.742	0	2	-7.4
502	CHEMBL246077	c1ccccc1S(=O)(=O)N(CCO2)c(c23)cccc3N4CCNCC4	12.59	7.9	1.68	2	-1.154	1	0	0	0	-1.557	1	2	-10
503	CHEMBL246079	c1ccc(Cl)cc1S(=O)(=O)N(CCO2)c(c23)cccc3N4CCNCC4	1.995	8.7	2.34	2	-1.144	1	0	0	0	-1.611	1	2	-10.2
504	CHEMBL246080	c1ccc(cc1F)S(=O)(=O)N(CCO2)c(c23)cccc3N4CCNCC4	10	8	1.82	2	-1.008	1	0	0	0	-1.481	1	2	-9.8
505	CHEMBL246484	c1n[nH]c(c12)CC(CC2=O)CN(CC3)CCC3c4noc(c45)cc(F)cc5	630.96	6.2	3.31	6	0	1	1	1	0	-1.121	0	3	-10.9
506	CHEMBL246916	C1CNCCN1c2cc(C(C)(C)C)cc(c23)N(CCO3)S(=O)(=O)c(c4F)cccc4	7.943	8.1	3.12	1	-0.999	1	0	0	0	-1.484	1	2	-10.6
507	CHEMBL247071	CN(C)CCc1cn(c(c12)cccc2)Cc3ccc(cc3)OC	132	6.879	3.8	1	0	1	0	0	0	-1.391	1	2	-8.2
508	CHEMBL247120	CC1CN(CC(C)N1)c2cc(C)cc(c23)N(CCO3)S(=O)(=O)c4ccc(Cl)cc4	39.81	7.4	3.42	4	-1.178	1	0	0	0	-1.645	1	2	-9.8
509	CHEMBL247121	c1ccccc1S(=O)(=O)N(CC(O2)(C)C)c(c23)cc(F)cc3C4CCNCC4	3.981	8.4	3.66	1	-0.962	1	0	0	0	-1.51	1	1	-10.7
510	CHEMBL247477	CN(C)CCc1cn(c(c12)cccc2)S(=O)(=O)c(cc3)ccc3OC	13	7.886	2.99	1	-1.393	1	1	0	0	-1.519	1	2	-8.6
511	CHEMBL247871	CCCCCCCCS(=O)(=O)n(c(c12)cccc2)cc1CCN(C)C	440	6.357	4.28	3	-0.616	1	1	0	0	-0.739	0	2	-7.3
512	CHEMBL247885	CN(C)CCc1cn(c(c12)cccc2)Cc3ccc(N)cc3	44	7.357	3.38	2	0	1	0	0	0	-1.55	0	2	-8.3
513	CHEMBL247886	FC(F)(F)c1ccc(cc1)Cn(c(c23)cccc3)cc2CCN(C)C	445	6.352	4.81	2	0	1	0	0	0	-1.451	0	2	-9.2
514	CHEMBL248268	CCCCCS(=O)(=O)n(c(c12)cccc2)cc1CCN(C)C	220	6.658	3.11	4	-0.612	1	1	0	0	-0.737	0	2	-7.7
515	CHEMBL251857	c1ccccc1C(C)(C2=O)C(=O)Nc(c23)cc(cc3Br)OC	73.2	7.135	3.55	1	0	0	0	0	0	-0.442	1	0	-8.6
516	CHEMBL251861	c1ccccc1C(C)(C2=O)C(=O)Nc(c23)cc(cc3Cl)N(C)C	715	6.146	3.5	2	0	0	0	0	0	-0.637	0	1	-8.8
517	CHEMBL252496	c1cc(Cl)ccc1C(C)(C2=O)C(=O)Nc(c23)cc(Cl)cc3Cl	877	6.057	4.74	2	0	0	0	0	0	-0.621	0	0	-8.9
518	CHEMBL252673	c1ccccc1C(C)(C2=O)C(=O)Nc(c23)cc(Br)cc3Br	196.9	6.706	4.3	0	0	0	0	0	0	-0.519	0	0	-8.6
519	CHEMBL252774	CN(C)[C@@H](CC1)Cc(c12)cccc2NS(=O)(=O)c3ccccc3	90	7.046	2.91	4	-1.26	1	1	0	0	-1.604	0	1	-9.5
520	CHEMBL252902	CN(C)c(cc1)ccc1C(C)(C2=O)C(=O)Nc(c23)cc(Cl)cc3Cl	346	6.461	4.15	1	0	0	0	0	0	-0.641	0	1	-9.8
521	CHEMBL253061	c1cc(I)ccc1C(C)(C2=O)C(=O)Nc(c23)cc(Cl)cc3Cl	952	6.021	4.69	1	0	0	0	0	0	-0.588	0	0	-8.7
522	CHEMBL253095	CCNc(cc1)ccc1C(C)(C2=O)C(=O)Nc(c23)cc(Cl)cc3Cl	28.3	7.548	4.52	1	0	1	0	0	0	-0.662	0	0	-9.1
523	CHEMBL253397	CN(C)CCc1cn(c(c12)cccc2)Sc3ccccc3	90	7.046	4.3	3	-1.377	1	0	0	0	-1.493	0	2	-8.2
524	CHEMBL253502	COc(cc1)ccc1C(C)(C2=O)C(=O)Nc(c23)cc(Cl)cc3Cl	147	6.833	4.09	1	0	0	0	0	0	-0.525	1	0	-9.8
525	CHEMBL253709	c1cc(N)ccc1C(C)(C2=O)C(=O)Nc(c23)cc(Cl)cc3Cl	156	6.807	3.67	3	0	0	0	0	0	-0.668	0	0	-8.7
526	CHEMBL253718	c1cc(O)c(Br)cc1C(C)(C2=O)C(=O)Nc(c23)cc(Cl)cc3Cl	77.5	7.111	4.55	4	0	0	0	0	0	-0.46	0	0	-9
527	CHEMBL253826	CN(C)[C@H](CC1)Cc(c12)cccc2NS(=O)(=O)c3ccccc3	49	7.31	2.91	4	-1.236	1	1	0	0	-1.581	0	1	-9.5
528	CHEMBL254298	c1ccccc1C(C)(C2=O)C(=O)Nc(c23)cc(Cl)cc3Cl	54.7	7.262	4.09	1	0	0	0	0	0	-0.635	0	0	-9.5
529	CHEMBL254330	COc(cc1)ccc1[C@@](C)(C2=O)C(=O)Nc(c23)cc(Cl)cc3Cl	293	6.533	4.09	3	0	0	0	0	0	-0.507	1	0	-8.9
530	CHEMBL254331	COc(cc1)ccc1[C@](C)(C2=O)C(=O)Nc(c23)cc(Cl)cc3Cl	893	6.049	4.09	1	0	0	0	0	0	-0.526	1	0	-9.5
531	CHEMBL26655	C1CN(C)CC=C1c2c[nH]c(c23)cccc3	98	7.009	2.89	4	0	1	0	0	0	-1.256	0	1	-7.7
532	CHEMBL298274	C1CCCN(C12)CCN(C2)c(cc3)cc(c34)n(cc4)S(=O)(=O)c5cccc(c56)cccc6	1.7	8.77	4.71	3	-1.563	1	0	0	0	-2.478	0	3	-11.2
533	CHEMBL299569	Cc1ccc(cc1)S(=O)(=O)n(cc2)c(c23)cc(cc3)N(C4)CCN(C45)CCCC5	4.9	8.31	3.86	4	-1.472	1	0	0	0	-2.262	0	3	-11.3
534	CHEMBL30713	CC(N)Cc1c[nH]c(c12)cccc2	910.505	6.041	2.06	5	0	1	0	0	0	-0.936	0	0	-6.2
535	CHEMBL318018	c1c(Cl)ccc(c12)sc(C)c2S(=O)(=O)Nc(c3)ccc(c34)nccc4N5CCNCC5	1	9	4.62	2	-1.595	1	0	0	0	-2.292	0	2	-10.7
536	CHEMBL3216123	C1CNCCN1Cc2cccc(c23)n(cc3)S(=O)(=O)c(cc4)ccc4C	10.72	7.97	2.59	0	-1.439	2	1	1	0	-1.892	0	2	-10.3
537	CHEMBL3216565	C1CNCCN1Cc2cccc(c23)n(cc3)S(=O)(=O)c4ccccc4	7.84	8.106	2.28	2	-1.46	2	1	1	0	-1.989	0	2	-9.8
538	CHEMBL3220215	Cc(n1)oc(c12)CC(CC2=O)CN(CC3)CCC3c4c[nH]c(c45)cc(F)cc5	213.8	6.67	4.23	5	0	1	1	1	0	-1.353	0	2	-11.3
539	CHEMBL3220219	C1CCCN1c(s2)nc(c23)CC(CC3=O)CN(CC4)CCC4c5c[nH]c(c56)cc(F)cc6	354.81	6.45	4.99	7	-0.831	1	1	1	0	-2.004	0	3	-11
540	CHEMBL3233402	c1ccccc1N(CC2)CCN2CCCCCN3C(=O)N(C)C(=O)C3(c4ccccc4)c5ccccc5	3071	5.513	4.82	7	0	1	1	1	1	-1.423	0	4	-11
541	CHEMBL3233665	c1ccccc1N(CC2)CCN2CCCCCN3C(=O)N(C)C(=O)C3(C)c4ccccc4	9600	5.018	3.79	6	0	1	1	1	1	-0.903	0	4	-9.6
542	CHEMBL3233666	c1cccc(F)c1N(CC2)CCN2CCCCCN3C(=O)N(C)C(=O)C3(C)c4ccccc4	25520	4.593	3.93	8	0	1	1	1	1	-0.746	0	4	-10.1
543	CHEMBL3233667	c1cccc(OC)c1N(CC2)CCN2CCCCCN3C(=O)N(C)C(=O)C3(C)c4ccccc4	14650	4.834	3.8	9	0	1	1	1	1	-0.777	1	4	-10.1
544	CHEMBL3233668	c1ccccc1N(CC2)CCN2CCCCCN3C(=O)N(C(=O)C3(C)C)Cc4ccccc4	4368	5.36	4.22	6	0	1	1	1	0	-1.003	0	4	-10
545	CHEMBL3233669	c1cccc(OC)c1N(CC2)CCN2CCCCCN3C(=O)N(C(=O)C3(C)C)Cc4ccccc4	8611	5.065	4.23	6	0	1	1	1	0	-0.889	1	4	-10.2
546	CHEMBL3233670	c1ccc(OC)cc1N(CC2)CCN2CCCCCN3C(=O)N(C(=O)C3(C)C)Cc4ccccc4	2926	5.534	4.23	8	0	1	1	1	0	-0.957	1	4	-10.5
547	CHEMBL3233671	c1cccc(F)c1N(CC2)CCN2CCCCCN3C(=O)N(C(=O)C3(C)C)Cc4ccccc4	2506	5.601	4.36	6	0	1	1	1	0	-0.854	0	4	-10.2
548	CHEMBL3233672	c1ccccc1CN(C(=O)C2(C)C)C(=O)N2CCCCCN3CCN(CC3)c4ccc(F)cc4	1945	5.711	4.36	6	0	1	1	1	0	-0.856	0	4	-10.1
549	CHEMBL3233673	c1ccccc1CN(C(=O)C2(C)C)C(=O)N2CCCCCN3CCN(CC3)c4c(F)cc(F)cc4	7469	5.127	4.5	7	0	1	1	1	0	-0.706	0	4	-10.3
550	CHEMBL3233675	c1cc(F)ccc1N(CC2)CCN2CCCCCN3C(=O)N(C(=O)C3(C)C)Cc4ccc(F)cc4	1762	5.754	4.5	6	0	1	1	1	0	-0.717	0	4	-10
551	CHEMBL3235744	c1cccc(c12)CN([C@@H](C2)C(=O)N)C(=O)CCCCCN3CCN(CC3)c4c(SC)cccc4	282	6.55	3.53	8	-0.766	1	1	1	0	-1.607	0	3	-10.2
552	CHEMBL3260785	c1ccccc1C(CC2=O)CN2c(c3)ccc(c34)CCNCC4	54	7.268	2.9	3	0	1	1	0	0	-1.365	0	1	-9.8
553	CHEMBL3260786	c1cccc(Cl)c1C(CC2=O)CN2c(c3)ccc(c34)CCNCC4	100	7	3.55	3	0	1	1	0	0	-1.359	0	1	-10.2
554	CHEMBL3260787	c1cccc(Cl)c1C2CCN(C2)c(c3)ccc(c34)CCNCC4	650	6.187	4.02	7	0	1	0	0	0	-1.709	0	1	-9.6
555	CHEMBL3260788	c1ccccc1C(CC2=O)CN2c(c3)ccc(c34)CNCCC4	1200	5.921	3.24	3	0	1	1	0	0	-1.321	0	1	-10
556	CHEMBL3260789	c1ccccc1C(CC2=O)CN2c(c3)ccc(c34)CCNC4	140	6.854	2.85	3	0	1	1	0	0	-1.317	0	1	-9.6
557	CHEMBL3260790	c1ccccc1C(CC2=O)CN2c(ccc3)cc3C4CCNCC4	70	7.155	3.67	3	0	1	0	0	0	-1.526	0	1	-10.2
558	CHEMBL3260791	c1ccccc1C(CC2=O)CN2c3cc(ccc3)N4CCNCC4	84	7.076	2.62	3	0	1	0	0	0	-1.463	0	2	-10
559	CHEMBL3260792	c1ccccc1C(CC2=O)CN2c3cccc(n3)N4CCNCC4	48	7.319	2.01	3	0	1	0	0	0	-1.26	0	3	-9.8
560	CHEMBL3260796	c1ccccc1C(CC2=O)CN2c(cc3)cc(c34)nccc4N5CCNCC5	55	7.26	3.16	3	0	1	0	0	0	-1.553	0	3	-10.4
561	CHEMBL3260801	c1cccc(Cl)c1C(O2)CN(C2=O)c(c3)ccc(c34)CCNCC4	47	7.328	3.73	4	0	1	0	0	0	-1.01	1	1	-10
562	CHEMBL3260802	c1cccc(OC)c1C(O2)CN(C2=O)c(c3)ccc(c34)CCNCC4	87	7.06	3.08	3	0	1	0	0	0	-0.881	2	1	-9.5
563	CHEMBL3260804	c1cccc(Cl)c1C(O2)CN(C2=O)c3cc(ccc3)OC4CCNCC4	240	6.62	4.17	4	0	1	0	0	0	-1.061	2	1	-9.8
564	CHEMBL3260805	c1cccc(Cl)c1C(O2)CN(C2=O)c3cc(ccc3)N4CCNCC4	140	6.854	3.45	3	0	1	0	0	0	-1.111	1	2	-10.1
565	CHEMBL3260807	C1NCCc(c12)ccc(c2)N(C3=O)CC(O3)c4c(Cl)cccc4	150	6.824	3.68	5	0	1	0	0	0	-0.906	1	1	-9.7
566	CHEMBL3260808	C1CNCc(c12)ccc(c2)N(C3=O)CC(O3)c4c(Cl)cccc4	330	6.481	3.68	3	0	1	0	0	0	-0.912	1	1	-10.3
567	CHEMBL3286399	c1cccc(c1C)S(=O)(=O)n(cc2c34)c3cccc4N5C(C2)CNCC5	20.945	7.679	2.52	1	-1.413	1	1	0	1	-1.906	0	2	-10.5
568	CHEMBL3286432	Fc1c(Cl)cc(cc1)S(=O)(=O)NCCCCN2CCN(CC2)c3nsc(c34)cccc4	53	7.276	3.97	7	-1.522	2	2	1	0	-1.684	0	3	-10
569	CHEMBL3286581	c1ccccc1S(=O)(=O)n(cc2c34)c3cccc4N5C(C2)CNCC5	8.9565	8.048	2.21	1	-1.448	1	1	0	1	-1.94	0	2	-10.6
570	CHEMBL3286582	Cc1cc(ccc1)S(=O)(=O)n(cc2c34)c3cccc4N5C(C2)CNCC5	23.995	7.62	2.52	1	-1.414	1	1	0	1	-1.906	0	2	-11.2
571	CHEMBL3286583	Cc1ccc(cc1)S(=O)(=O)n(cc2c34)c3cccc4N5C(C2)CNCC5	95.75	7.019	2.52	2	-1.417	1	1	0	1	-1.91	0	2	-11.1
572	CHEMBL3286586	Fc1ccc(cc1)S(=O)(=O)n(cc2c34)c3cccc4N5C(C2)CNCC5	28.92	7.539	2.35	2	-1.302	1	1	0	1	-1.794	0	2	-10.8
573	CHEMBL3286588	C1=C=C=CC=C1S(=O)(=O)n(cc2c34)c3cccc4N5C(C2)CNCC5	46.885	7.329	1.92	1	-1.269	1	1	0	1	-1.76	0	2	-10.7
574	CHEMBL3286589	c1cc(Cl)ccc1S(=O)(=O)n(cc2c34)c3cccc4N5C(C2)CNCC5	182.985	6.738	2.87	1	-1.463	1	1	0	1	-1.954	0	2	-10.8
575	CHEMBL3286590	c1cccc(c1OC)S(=O)(=O)n(cc2c34)c3cccc4N5C(C2)CNCC5	25.85	7.588	2.22	2	-1.338	1	1	0	1	-1.832	1	2	-9.9
576	CHEMBL3286591	COc1cc(ccc1)S(=O)(=O)n(cc2c34)c3cccc4N5C(C2)CNCC5	23.995	7.62	2.22	1	-1.346	1	1	0	1	-1.839	1	2	-10.5
577	CHEMBL3286592	COc1ccc(cc1)S(=O)(=O)n(cc2c34)c3cccc4N5C(C2)CNCC5	168.91	6.772	2.22	1	-1.353	1	1	0	1	-1.846	1	2	-10.6
578	CHEMBL3289708	Cc1cc(ccc1)S(=O)(=O)NCCN2CCN(CC2)c3nsc(c34)cccc4	430	6.367	2.71	9	-1.62	2	2	1	0	-1.778	0	3	-9.6
579	CHEMBL3289944	Cc1cc(ccc1)S(=O)(=O)NCCCCN2CCN(CC2)c3nsc(c34)cccc4	100	7	3.49	6	-1.604	2	2	1	0	-1.769	0	3	-10
580	CHEMBL3289946	Clc1c(Cl)ccc(c1)S(=O)(=O)NCCCCN2CCN(CC2)c3nsc(c34)cccc4	71	7.149	4.48	7	-1.735	2	2	1	0	-1.943	0	3	-10.2
581	CHEMBL3289950	s1cccc1S(=O)(=O)NCCCN2CCN(CC2)c3nsc(c34)cccc4	140	6.854	2.85	6	-1.937	2	2	1	0	-2.093	0	3	-8.9
582	CHEMBL3289951	s1cccc1S(=O)(=O)NCCCCN2CCN(CC2)c3nsc(c34)cccc4	42	7.377	3.24	7	-1.951	2	2	1	0	-2.162	0	3	-8.9
583	CHEMBL3289953	c1cccc(c12)ccc(c2)S(=O)(=O)NCCCN3CCN(CC3)c4nsc(c45)cccc5	40	7.398	3.94	8	-1.569	2	2	1	0	-2.06	0	3	-10.6
584	CHEMBL3289957	c1cccc(c12)sc(c2)S(=O)(=O)NCCCN3CCN(CC3)c4nsc(c45)cccc5	63	7.201	4	7	-2.064	2	2	1	0	-2.228	0	3	-10.3
585	CHEMBL3289958	c1cccc(c12)sc(c2)S(=O)(=O)NCCCCN3CCN(CC3)c4nsc(c45)cccc5	33	7.481	4.39	6	-2.054	2	2	1	0	-2.26	0	3	-9.8
586	CHEMBL3289963	c1cccn(c12)c(cn2)S(=O)(=O)NCCCN3CCN(CC3)c4nsc(c45)cccc5	84	7.076	2.43	6	-2.178	2	2	1	0	-2.457	0	5	-9.9
587	CHEMBL3289964	c1cccn(c12)c(cn2)S(=O)(=O)NCCCCN3CCN(CC3)c4nsc(c45)cccc5	140	6.854	2.82	7	-2.159	2	2	1	0	-2.486	0	5	-9.9
588	CHEMBL3289965	n1csc(c12)cccc2S(=O)(=O)NCCCN3CCN(CC3)c4nsc(c45)cccc5	27	7.569	3.4	8	-1.856	2	2	1	0	-2.021	0	4	-9.7
589	CHEMBL3289966	n1csc(c12)cccc2S(=O)(=O)NCCCCN3CCN(CC3)c4nsc(c45)cccc5	120	6.921	3.79	8	-1.857	2	2	1	0	-2.067	0	4	-10
590	CHEMBL3289967	Cc1cc(ccc1)S(=O)(=O)NCCCN2CCN(CC2)c3noc(c34)cccc4	1500	5.824	2.63	7	-0.819	2	2	1	0	-1.613	0	3	-10.1
591	CHEMBL3289968	Cc1cc(ccc1)S(=O)(=O)NCCCCN2CCN(CC2)c3noc(c34)cccc4	87	7.06	3.02	7	-0.823	2	2	1	0	-1.619	0	3	-10.4
592	CHEMBL3289969	Clc1c(Cl)ccc(c1)S(=O)(=O)NCCCN2CCN(CC2)c3noc(c34)cccc4	1100	5.959	3.63	7	-0.905	2	2	1	0	-1.698	0	3	-10.2
593	CHEMBL3289971	Fc1c(Cl)cc(cc1)S(=O)(=O)NCCCN2CCN(CC2)c3noc(c34)cccc4	330	6.481	3.11	5	-0.733	2	2	1	0	-1.527	0	3	-10.3
594	CHEMBL3289981	c1cccc(c12)sc(c2)S(=O)(=O)NCCCN3CCN(CC3)c4noc(c45)cccc5	35	7.456	3.53	7	-1.278	2	2	1	0	-2.072	0	3	-10.3
595	CHEMBL3289982	c1cccc(c12)sc(c2)S(=O)(=O)NCCCCN3CCN(CC3)c4noc(c45)cccc5	1100	5.959	3.92	8	-1.276	2	2	1	0	-2.071	0	3	-10.2
596	CHEMBL3289983	c1cc(Cl)cc(c12)sc(c2)S(=O)(=O)NCCCN3CCN(CC3)c4noc(c45)cccc5	560	6.252	4.19	6	-1.297	2	2	1	0	-2.092	0	3	-10.4
597	CHEMBL3289987	c1cccn(c12)c(cn2)S(=O)(=O)NCCCCN3CCN(CC3)c4noc(c45)cccc5	95	7.022	2.36	6	-1.377	2	2	1	0	-2.289	0	5	-9.7
598	CHEMBL3289990	Cc1cc(ccc1)S(=O)(=O)NCCN(CC2)CCC2c3noc(c34)cc(F)cc4	210	6.678	3.43	9	-0.826	2	2	1	0	-1.527	0	2	-10.6
599	CHEMBL3289992	Cc1cc(ccc1)S(=O)(=O)NCCCCN(CC2)CCC2c3noc(c34)cc(F)cc4	140	6.854	4.21	5	-0.824	2	2	1	0	-1.527	0	2	-10
600	CHEMBL3289996	Fc1c(Cl)cc(cc1)S(=O)(=O)NCCCCN(CC2)CCC2c3noc(c34)cc(F)cc4	48	7.319	4.7	6	-0.734	2	2	1	0	-1.436	0	2	-10.6
601	CHEMBL3289999	s1cccc1S(=O)(=O)NCCCN(CC2)CCC2c3noc(c34)cc(F)cc4	66	7.18	3.58	8	-1.18	2	2	1	0	-1.884	0	2	-9.6
602	CHEMBL3290000	s1cccc1S(=O)(=O)NCCCCN(CC2)CCC2c3noc(c34)cc(F)cc4	130	6.886	3.97	4	-1.17	2	2	1	0	-1.886	0	2	-9.6
603	CHEMBL3290001	c1cccc(c12)cccc2S(=O)(=O)NCCN(CC3)CCC3c4noc(c45)cc(F)cc5	250	6.602	4.28	7	-0.958	2	2	1	0	-1.762	0	2	-11.2
604	CHEMBL3290002	c1cccc(c12)cccc2S(=O)(=O)NCCCN(CC3)CCC3c4noc(c45)cc(F)cc5	83	7.081	4.67	7	-0.973	2	2	1	0	-1.78	0	2	-11.4
605	CHEMBL3290004	c1cccc(c12)ccc(c2)S(=O)(=O)NCCN(CC3)CCC3c4noc(c45)cc(F)cc5	133	6.876	4.28	6	-0.783	2	2	1	0	-1.771	0	2	-11.6
606	CHEMBL3290011	c1cccc(c12)sc(c2)S(=O)(=O)NCCCN(CC3)CCC3c4noc(c45)cc(F)cc5	40	7.398	4.73	8	-1.278	2	2	1	0	-1.98	0	2	-10.8
607	CHEMBL3290018	c1cccn(c12)c(cn2)S(=O)(=O)NCCCN(CC3)CCC3c4noc(c45)cc(F)cc5	100	7	3.16	6	-1.425	2	2	1	0	-2.236	0	4	-10.4
608	CHEMBL3290019	c1cccn(c12)c(cn2)S(=O)(=O)NCCCCN(CC3)CCC3c4noc(c45)cc(F)cc5	100	7	3.55	7	-1.374	2	2	1	0	-2.194	0	4	-10.6
609	CHEMBL3290021	n1csc(c12)cccc2S(=O)(=O)NCCCCN(CC3)CCC3c4noc(c45)cc(F)cc5	70	7.155	4.51	5	-1.07	2	2	1	0	-1.773	0	3	-10.2
610	CHEMBL3329427	c1ccccc1C(=O)n(c(c23)ccc(F)c3)cc2C4=CCNCC4	99	7.004	3.85	1	0	1	1	0	0	-1.582	0	1	-9.7
611	CHEMBL3329428	c1ccccc1NC(=O)n(c(c23)ccc(F)c3)cc2C4=CCNCC4	118	6.928	4.24	2	0	1	1	0	0	-1.614	0	1	-10
612	CHEMBL3329431	C1CCCN1CCOc(ccc2)c(c23)[nH]cc3S(=O)(=O)c(cc4F)ccc4	20	7.699	3.61	1	-1.748	1	0	1	0	-2.275	1	1	-9.4
613	CHEMBL3329433	Cc1cc(C)cc(c1)S(=O)(=O)c(c2)ccc(c23)ccnc3N4CCNCC4	11	7.959	3.09	2	-1.52	1	0	0	0	-2.098	0	2	-10.5
614	CHEMBL3329434	C1CNCCN1c(nc(n2)C)n(c23)nc(SC)c3S(=O)(=O)c4ccccc4	1.2	8.921	1.4	0	-1.528	1	0	0	0	-1.881	0	5	-9.2
615	CHEMBL3329437	C1CNCC=C1n2c(=O)n(c(c23)cccc3)S(=O)(=O)c(c4)ccc(c45)cccc5	5.7	8.244	3.03	0	-1.027	1	1	0	0	-1.841	0	2	-10.6
616	CHEMBL3329443	c1ccccc1S(=O)(=O)c(c(c23)cccc3)ccc2C4CCNCC4	3.8	8.42	4.14	1	-1.844	1	0	0	0	-2.375	0	0	-10.5
617	CHEMBL3329444	N=C(N)CCC1CCCc(c12)cc(cc2)S(=O)(=O)c3ccccc3	59	7.229	3.66	3	-1.732	0	0	0	0	-1.973	0	0	-9.4
618	CHEMBL3329445	c1c(Cl)cc(OC)c(OC)c1C(C)Nc2c(S(=O)(=O)C)ccc(c2)N3CCNCC3	4	8.398	3.34	6	-0.958	2	0	0	0	-1.636	2	1	-8.8
619	CHEMBL3329455	c1cccc(Cl)c1C(C)Nc(c2)ccc(c23)CCNCC3	14	7.854	4.2	5	0	2	0	0	0	-1.399	0	0	-8.8
620	CHEMBL3331585	c1c(Cl)ccc(c12)sc(c2C)S(=O)(=O)Nc(c3)cc(c(c34)OCC4)N(CC5)CCN5C	1.6	8.796	4.35	2	-1.655	1	0	0	0	-1.892	1	2	-10.4
621	CHEMBL3360992	O=c1n(C)c(=O)n(C)c(c12)ncn2CCCN3CCN(CC3)c4c(OC)cccc4	12100	4.917	0.65	8	0	1	1	1	0	-0.829	1	6	-9.6
622	CHEMBL3360994	O=c1n(C)c(=O)n(C)c(c12)ncn2CCCCN3CCN(CC3)c4ccccc4	14210	4.847	1.04	9	0	1	1	1	0	-0.963	0	6	-9.6
623	CHEMBL3360995	O=c1n(C)c(=O)n(C)c(c12)ncn2CCCCN3CCN(CC3)c4c(OC)cccc4	1970	5.706	1.04	9	0	1	1	1	0	-0.822	1	6	-9.2
624	CHEMBL3360996	O=c1n(C)c(=O)n(C)c(c12)ncn2CCCCN3CCN(CC3)c4cc(Cl)ccc4	5150	5.288	1.69	9	0	1	1	1	0	-0.966	0	6	-9.4
625	CHEMBL3360998	O=c1n(C)c(=O)n(C)c(c12)ncn2CCCCN3CCN(CC3)c(c4)ccc(Cl)c4Cl	1902	5.721	2.34	6	0	1	1	1	0	-0.995	0	6	-9.6
626	CHEMBL3361000	O=c1n(C)c(=O)n(C)c(c12)ncn2CCCCCN3CCN(CC3)c4c(OC)cccc4	8987	5.046	1.43	9	0	1	0	1	0	-0.813	1	6	-9.2
627	CHEMBL3361001	O=c1n(C)c(=O)n(C)c(c12)ncn2CCCCCN3CCN(CC3)c4cc(Cl)ccc4	1195	5.923	2.08	9	0	1	0	1	0	-0.972	0	6	-9.5
628	CHEMBL3409035	c1cccc(c12)CN([C@@H](C2)C(=O)N)C(=O)CCCCN3CCN(CC3)c(cccc4)c4-c5ccccc5	594	6.226	4.08	9	0	1	1	1	0	-1.974	0	3	-11.7
629	CHEMBL3409037	C1CCCCN1C(=O)[C@@H]2CCCN2C(=O)CCCCCCN3CCN(CC3)c(c4C(C)C)cccc4	603	6.22	4.89	8	0	1	1	1	0	-1.597	0	4	-9.9
630	CHEMBL3409247	c1cccc(c1C(=O)N)OCCCNCCc2cn(c(c23)cccc3)Cc4ccccc4	680	6.167	4.39	7	0	1	1	0	0	-1.938	1	1	-9.7
631	CHEMBL3409248	c1cccc(c1C(=O)N)OCCCNCCc2cn(c(c23)cccc3)S(=O)(=O)c4ccccc4	62	7.208	3.58	8	-1.483	1	1	0	0	-2.044	1	1	-10.3
632	CHEMBL3409261	c1ccccc1OCCCCN2CCN(CC2)c3cccc(c34)n(cc4)S(=O)(=O)c5ccccc5	16	7.796	4.86	5	-1.473	1	0	1	0	-2.412	1	3	-11.2
633	CHEMBL3410504	CN(C)CCn1c(=O)sc(c12)cc(cc2)S(=O)(=O)Nc3cccc(c34)cccc4	100	7	3.58	4	-1.103	1	1	0	0	-1.468	0	2	-9.7
634	CHEMBL3423334	c1cc(Cl)ccc1N(CC2)CCN2CCCCCn3ccn4c3nc(c45)n(C)c(=O)n(C)c5=O	1591	5.798	2.33	6	0	1	0	1	0	-1.515	0	7	-10.5
635	CHEMBL3423335	c1cc(Cl)ccc1N(CC2)CCN2CCCCn3c(C)cn4c3nc(c45)n(C)c(=O)n(C)c5=O	1456	5.837	2.25	8	0	1	0	1	1	-1.479	0	7	-10.5
636	CHEMBL3423336	c1cc(Cl)ccc1N(CC2)CCN2CCCCCn3c(C)cn4c3nc(c45)n(C)c(=O)n(C)c5=O	837	6.077	2.64	6	0	1	0	1	1	-1.502	0	7	-10.7
637	CHEMBL3423339	O=c1n(C)c(=O)n(C)c(c12)nc3n2cc(C)n3CCCCN4CCN(CC4)c5cccc(C)c5C	510	6.292	2.21	6	0	1	0	1	1	-1.402	0	7	-10.5
638	CHEMBL354417	Cc1cccc(c12)COC(=O)N2C3CCN(CC3)S(=O)(=O)c4csc(c45)cccc5	124.5	6.905	4.52	8	-1.548	1	1	0	0	-1.613	1	2	-9.1
639	CHEMBL359460	COc1ccc(cc1)S(=O)(=O)n(c(c23)cccc3)cc2C4=CCNCC4	18	7.745	3.26	1	-1.364	1	1	0	0	-1.833	1	1	-10.2
640	CHEMBL359604	c1ccccc1NC(=O)n(c(c23)cccc3)cc2C4=CCN(C)CC4	118	6.928	4.44	2	0	1	1	0	0	-1.731	0	2	-10
641	CHEMBL359967	c1cc(F)cc(c12)n(CCN(C)C)cc2S(=O)(=O)c3ccccc3	46	7.337	3.17	1	-2.057	1	1	0	0	-1.986	0	2	-8.6
642	CHEMBL360181	c1cccc(c12)n(CCNC)cc2S(=O)(=O)c3ccccc3	15.5	7.81	2.69	2	-2.026	1	1	0	0	-2.121	0	1	-8.4
643	CHEMBL360234	Nc1ccc(cc1)S(=O)(=O)n(c(c23)cc(Cl)cc3)cc2C4=CCNCC4	3	8.523	3.49	2	-1.53	1	1	0	0	-1.994	0	1	-9.8
644	CHEMBL360642	c1c(F)ccc(c12)n(CCN(C)C)cc2S(=O)(=O)c3ccccc3	44	7.357	3.17	2	-1.861	1	1	0	0	-1.987	0	2	-8.7
645	CHEMBL361230	C1CN(C)CCC1c2c[nH]c(c23)ccc(c3)NS(=O)(=O)c4cccc(c45)cccc5	4.7	8.328	4.93	3	-1.328	1	0	0	0	-2.289	0	1	-11.2
646	CHEMBL361572	Fc1ccc(cc1)S(=O)(=O)n(c(c23)ccc(F)c3)cc2C4=CCNCC4	3	8.523	3.53	1	-1.365	1	1	0	0	-1.722	0	1	-10.9
647	CHEMBL362177	Nc1ccc(cc1)S(=O)(=O)n(c(c23)cc([N+]([O-])=O)cc3)cc2C4=CCNCC4	31	7.509	2.75	2	-1.732	1	1	0	0	-2.111	0	2	-10.2
648	CHEMBL362220	FC(F)(F)c1ccc(cc1)S(=O)(=O)n(c(c23)cccc3)cc2C4=CCNCC4	20	7.699	4.27	2	-1.414	1	1	0	0	-1.884	0	1	-10.2
649	CHEMBL362628	CN(C)CCc1c[nH]c(c12)ccc(c2)NS(=O)(=O)c(c(n3)Cl)n(c34)ccs4	2.2	8.658	3.44	3	-2.033	1	0	0	0	-2.541	0	3	-8.7
650	CHEMBL362921	s1c(Cl)ccc1S(=O)(=O)n(c(c23)cccc3)cc2C4=CCCNC4	22.7	7.644	3.97	1	-1.878	1	1	0	0	-2.373	0	1	-10
651	CHEMBL363275	c1cccc(c12)n(cc2CCN)S(=O)(=O)c3ccccc3	10.15	7.994	2.38	2	-1.485	1	1	0	0	-1.61	0	1	-8.7
652	CHEMBL363827	c1cccc(c1F)S(=O)(=O)n(c(c23)cccc3)cc2C4=CCCNC4	9.2	8.036	3.39	1	-1.351	1	1	0	0	-1.854	0	1	-10.7
653	CHEMBL363843	Fc1c(F)ccc(c1)S(=O)(=O)n(c(c23)cccc3)cc2C4CCCNC4	7	8.155	3.62	3	-1.199	1	1	0	0	-1.701	0	1	-10.4
654	CHEMBL364248	c1cc(N)ccc1Cc2c[nH]c(c23)cccc3	2530	5.597	3.34	4	0	0	0	0	0	-1.569	0	0	-8.1
655	CHEMBL365471	c1cccc2n(c(c3c12)CCCC3)S(=O)(=O)c(cc4)ccc4N	29	7.538	3.34	2	-1.689	0	0	0	0	-1.909	0	1	-9.9
656	CHEMBL365993	N1CCC[C@H]1Cc2cn(c(c23)cccc3)S(=O)(=O)c(cc4)ccc4C	33	7.481	3.48	1	-1.466	1	1	0	0	-1.946	0	1	-9.9
657	CHEMBL366151	c1cccc(c12)n(CCN(C)C)cc2S(=O)(=O)c(cc3F)ccc3	12.1	7.917	3.17	1	-1.911	1	1	0	0	-2.005	0	2	-8.7
658	CHEMBL366248	C1CNCCN1c(ncc2)c(c23)[nH]cc3S(=O)(=O)c4ccccc4	25.12	7.6	1.81	2	-2.026	1	0	0	1	-2.388	0	2	-9.1
659	CHEMBL366515	n1cccc(c12)cccc2S(=O)(=O)N(CC3)CCC3N(C(=O)OC4)c(c45)cccc5	151.9	6.818	3.54	7	-1.107	1	1	0	0	-1.387	1	3	-11.1
660	CHEMBL367088	C1CCCN1CCn(cc2)c(c23)ccc(c3)NS(=O)(=O)c(c(n4)Cl)n(c45)ccs5	9.8	8.009	3.9	2	-2.055	1	0	1	0	-2.893	0	4	-9.5
661	CHEMBL367305	C1CCCCN1CCn(cc2)c(c23)ccc(c3)NS(=O)(=O)c(c(n4)Cl)n(c45)ccs5	31.4	7.503	4.29	3	-2.028	1	0	1	0	-2.954	0	4	-9.6
662	CHEMBL367730	C1CN(C)CCC1c2c[nH]c(c23)ccc(c3)NS(=O)(=O)c4ccc(s4)Cl	24.3	7.614	4.49	3	-1.604	1	0	0	0	-2.466	0	1	-9.8
663	CHEMBL367832	C1CCCN1CCn(cc2)c(c23)cc(cc3)NS(=O)(=O)c(c(n4)Cl)n(c45)ccs5	52.2	7.282	3.9	2	-2.109	1	0	1	0	-2.905	0	4	-9.5
664	CHEMBL368058	C1COCCN1CCc2c[nH]c(c23)ccc(c3)NS(=O)(=O)c(c4)ccc(c45)cccc5	132	6.879	4	3	-1.145	1	0	1	0	-2.055	1	1	-10.6
665	CHEMBL368069	c1cccc(c12)cccc2CCS(=O)(=O)Nc(cc3)cc(c34)n(cc4)CCN(C)C	74.5	7.128	4.34	4	-0.633	1	0	0	0	-1.698	0	2	-9.9
666	CHEMBL368557	Cc1cccc(c12)COC(=O)N2C3CCN(CC3)S(=O)(=O)c4cccc(c45)cccn5	165.9	6.78	3.85	8	-1.144	1	1	0	0	-1.368	1	3	-10.7
667	CHEMBL368871	CN(C)CCn(cc1)c(c12)cc(cc2)NS(=O)(=O)c(c3)ccc(c34)cccc4	41.2	7.385	4.16	4	-1.222	1	0	0	0	-1.959	0	2	-9.9
668	CHEMBL368959	C1CN(C)CCC1c2c[nH]c(c23)ccc(c3)NS(=O)(=O)c(ccc4)c(c45)nccc5	21.2	7.674	4.33	2	-1.097	1	0	0	0	-2.116	0	2	-11.7
669	CHEMBL370215	CN1CCC[C@H]1Cc2cn(c(c23)cccc3)S(=O)(=O)c(cc4)ccc4C	5	8.301	3.82	3	-1.468	1	1	0	0	-1.921	0	2	-9.8
670	CHEMBL370306	Fc1c(F)ccc(c1)S(=O)(=O)n(c(c23)cccc3)cc2C4=CCCNC4	26	7.585	3.53	2	-1.217	1	1	0	0	-1.708	0	1	-10.7
671	CHEMBL370508	N1CCC[C@H]1Cc2cn(c(c23)cccc3)S(=O)(=O)c4ccc(I)cc4	34	7.469	3.78	2	-1.48	1	1	0	0	-1.959	0	1	-9.5
672	CHEMBL370719	Clc1cccc(c1Cl)S(=O)(=O)n(c(c23)cccc3)cc2C4=CCCNC4	20	7.699	4.56	1	-1.548	1	1	0	0	-2.045	0	1	-10.8
673	CHEMBL371132	c1cccc(c12)n(S(=O)(=O)c(cc3F)ccc3)cc2C4=CCCNC4	8.5	8.071	3.39	1	-1.338	1	1	0	0	-1.784	0	1	-10.8
674	CHEMBL371176	c1cccc(Cl)c1S(=O)(=O)n(cc2)c(c23)ccc(Cl)c3N4CCNCC4	1	9	3.59	1	-1.493	1	0	0	0	-1.946	0	2	-9.4
675	CHEMBL371318	s1c(Cl)ccc1S(=O)(=O)n(c(c23)cccc3)cc2C4CCCNC4	3	8.523	4.06	1	-1.861	1	1	0	0	-2.353	0	1	-9.7
676	CHEMBL371469	CN1CCC[C@H]1Cc2cn(c(c23)cccc3)S(=O)(=O)c4c(Br)cccc4	7	8.155	4.28	1	-1.475	1	1	0	0	-1.934	0	2	-9.2
677	CHEMBL371876	c1cc(Cl)ccc1S(=O)(=O)n(cc2)c(c23)cccc3N4CCNCC4	1.995	8.7	2.94	1	-1.471	1	0	0	0	-2.024	0	2	-9.8
678	CHEMBL371886	CN1CCC[C@H]1Cc2cn(c(c23)cccc3)S(=O)(=O)c(c4)ccc(OC)c4OC	8	8.097	3.53	2	-1.252	1	1	0	0	-1.712	2	2	-9.1
679	CHEMBL372109	c1cccc(c12)n(cc2)S(=O)(=O)c(cc3)ccc3N	10	8	2.46	3	-1.577	0	0	0	0	-1.703	0	1	-8.4
680	CHEMBL372287	c1cc(Cl)ccc1S(=O)(=O)n(cc2)c(c23)ccc(Cl)c3N4CCNCC4	6.31	8.2	3.59	1	-1.507	1	0	0	0	-2.032	0	2	-9.2
681	CHEMBL372537	C1CNCCN1c(ccc2)c(c23)scc3S(=O)(=O)c4ccccc4	0.5006	9.301	3.14	1	-2.314	1	0	0	0	-2.497	0	1	-9
682	CHEMBL372569	s1cccc1S(=O)(=O)n(c(c23)cccc3)cc2C4CCCNC4	9.8	8.009	3.41	1	-1.81	1	1	0	0	-2.303	0	1	-9.2
683	CHEMBL372853	CNc1cc(NC)cc(c12)n(cc2)S(=O)(=O)c(cc3)ccc3N	1.9	8.721	2.54	2	-1.544	2	0	0	0	-1.741	0	1	-8.6
684	CHEMBL3739680	c1cccc(c1C(C)C)OCCN(CC2)CCC2NS(=O)(=O)c3cccc(c34)nccc4	233	6.633	4.18	6	-1.28	2	2	1	0	-1.796	1	2	-10.2
685	CHEMBL3739745	c1cccc(c1C(C)C)OCCN(CC2)CCC2NS(=O)(=O)c3cnn(C)c3	641	6.193	2.37	9	-1.187	2	2	1	0	-1.664	1	3	-9.3
686	CHEMBL3740054	c1cccc(c1C(C)C)OCCN(CC2)CCC2NS(=O)(=O)c(cc3F)ccc3	471	6.327	3.77	11	-1.082	2	2	1	0	-1.558	1	1	-9.7
687	CHEMBL3740055	c1ccccc1-c2c(cccc2)OCCN(CC3)CCC3NS(=O)(=O)c4cc(Cl)ccc4	276	6.559	4.83	9	-1.225	2	2	1	0	-2.146	1	1	-10.6
688	CHEMBL3740235	c1cccc(c1C(C)C)OCCN(CC2)CCC2NS(=O)(=O)c(c3F)cc(F)cc3	324	6.489	3.91	10	-0.942	2	2	1	0	-1.403	1	1	-9.9
689	CHEMBL3742076	c1cccc(c1C(C)C)OCCN(CC2)CCC2NS(=O)(=O)c(c3F)cccc3	240	6.62	3.77	9	-1.092	2	2	1	0	-1.557	1	1	-9.6
690	CHEMBL375594	c1cccc(S2(=O)=O)c1c(c3CCN(C)C)n2c(c34)cccc4	143	6.845	2.96	2	-1.248	1	1	0	0	-1.38	0	2	-9.2
691	CHEMBL3758591	C1CCCC1c2c(cccc2)OCCN(CC3)CCC3NS(=O)(=O)c(cc4F)ccc4	281	6.551	4.31	11	-1.069	2	2	1	0	-1.95	1	1	-10.4
692	CHEMBL3759205	CC(C)c1cc(ccc1)OCCN2C(CCC23)CC(C3)NS(=O)(=O)c(cc4)ccc4F	559	6.253	4.3	7	-1.01	2	2	0	0	-1.738	1	1	-9.9
693	CHEMBL3759617	CC(C)c1cc(ccc1)OCCN2C(CCC23)CC(C3)NS(=O)(=O)c(cc4F)ccc4	539	6.268	4.3	8	-0.998	2	2	0	0	-1.725	1	1	-9.9
694	CHEMBL3785100	C1CCCC12C=NN(C2)C(\NCC)=N\S(=O)(=O)c(c3)ccc(c34)[nH]cc4	4.8	8.319	2.68	1	-1.077	1	0	0	0	-1.844	0	3	-9.2
695	CHEMBL3785231	Nc1ccc(cc1)S(=O)(=O)/N=C(\NCC)N(C2)N=CC23CCNCC3	14.2	7.848	0.59	2	-0.98	2	0	0	0	-1.556	0	3	-8.6
696	CHEMBL3785259	c1ccc(cc1O)S(=O)(=O)/N=C(\NCC)N(C2)N=CC23CCCC3	18.5	7.733	1.91	3	-0.817	1	0	0	0	-1.34	0	3	-8.7
697	CHEMBL3785278	COc1cc(ccc1)S(=O)(=O)/N=C(\NCC)N(C2)N=CC23CCCC3	97.1	7.013	2.21	2	-0.809	1	0	0	0	-1.332	1	3	-8.8
698	CHEMBL3785431	Oc1c(Cl)cc(cc1)S(=O)(=O)/N=C(\NCC)N(C2)N=CC23CCCC3	14.6	7.836	2.56	2	-0.839	1	0	0	0	-1.356	0	3	-9.1
699	CHEMBL3785512	c1c(Cl)cc(cc1O)S(=O)(=O)/N=C(\NCC)N(C2)N=CC23CCCC3	6.1	8.215	2.56	4	-0.838	1	0	0	0	-1.357	0	3	-8.9
700	CHEMBL3785626	CCC1C=NN(C1)C(\NCC)=N\S(=O)(=O)c(cc2)ccc2N	7.2	8.143	1.25	2	-0.973	1	0	0	0	-1.164	0	3	-7.9
701	CHEMBL3785864	CC1(C)C=NN(C1)C(\NCC)=N\S(=O)(=O)c(cc2)ccc2N	20.6	7.686	1.25	2	-0.977	1	0	0	0	-1.137	0	3	-8.4
702	CHEMBL3786087	C1CCCC12C=NN(C2)C(\NCC)=N\S(=O)(=O)c(c3)ccc(c34)[nH]nc4	28.6	7.544	2.08	1	-1.007	1	0	0	0	-1.53	0	4	-9.6
703	CHEMBL378656	NCCc1c(OC)ccc(c1)NS(=O)(=O)c2ccccc2	17	7.77	2	3	-1.341	1	1	0	0	-1.256	1	0	-7.7
704	CHEMBL3786693	Nc1ccc(cc1)S(=O)(=O)/N=C(\NCC)N(C2)N=CC23CCCCC3	7.1	8.149	2.17	1	-0.981	1	0	0	0	-1.606	0	3	-9.2
705	CHEMBL3786703	COc1cc(cc(Cl)c1)S(=O)(=O)/N=C(\NCC)N(C2)N=CC23CCCC3	47.5	7.323	2.86	2	-0.824	1	0	0	0	-1.345	1	3	-8.9
706	CHEMBL3786973	Nc1ccc(cc1)S(=O)(=O)/N=C(\NCC)N(C2)N=CC23CCCC3	10	8	1.78	2	-0.976	1	0	0	0	-1.502	0	3	-8.7
707	CHEMBL3787014	CC(=O)Nc1c(Cl)cc(cc1)S(=O)(=O)/N=C(\NCC)N(C2)N=CC2CC	8.7	8.06	2.28	2	-0.973	1	0	0	0	-1.159	0	3	-8.8
708	CHEMBL3787201	Oc1ccc(cc1)S(=O)(=O)/N=C(\NCC)N(C2)N=CC23CCCC3	5.8	8.237	1.91	3	-0.83	1	0	0	0	-1.349	0	3	-9
709	CHEMBL3787246	CCC1C=NN(C1)C(\NCC)=N\S(=O)(=O)c(cc2)cc(c23)[nH]cc3	31.6	7.5	2.15	3	-0.934	1	0	0	0	-1.504	0	3	-8.8
710	CHEMBL378892	CN(C)CCc1ccn(c1)S(=O)(=O)c2ccccc2	15	7.824	1.83	2	-1.468	1	1	0	0	-1.468	0	2	-7.5
711	CHEMBL3797293	CC(C)CS(=O)(=O)n(cc1)c(c12)nc(N(CC3)CCN3C)cc2-c4cccnc4	36	7.444	2.68	1	-0.271	1	0	0	0	-1.205	0	5	-9.7
712	CHEMBL3797435	N#Cc1ccc(cc1)-c2cc(N(CC3)CCN3C)nc(c24)n(cc4)S(=O)(=O)CC(C)C	7	8.155	3.16	1	-0.291	1	0	0	0	-1.131	0	5	-10.5
713	CHEMBL3797717	FC(F)(F)c1ccc(cc1)-c2cc(N(CC3)CCN3C)nc(c24)n(cc4)S(=O)(=O)CC(C)C	4	8.398	4.31	1	-0.294	1	0	0	0	-1.288	0	4	-11
714	CHEMBL3798478	CC(C)CS(=O)(=O)n(cc1)c(c12)nc(N(CC3)CCN3C)cc2-c(c4)ccc(c45)[nH]cc5	5	8.301	3.77	1	-0.281	1	0	0	0	-1.702	0	4	-10.9
715	CHEMBL3798490	FC(F)(F)c1ccc(cc1)-c2cc(N(CC3)CCN3C)nc(c24)n(cc4)S(=O)(=O)CCOC	8	8.097	3.3	1	-0.286	1	0	0	0	-1.282	1	4	-10
716	CHEMBL3798840	FC(F)(F)c1cc(ccc1)-c2cc(N(CC3)CCN3C)nc(c24)n(cc4)S(=O)(=O)CC(C)C	48	7.319	4.31	1	-0.285	1	0	0	0	-1.281	0	4	-10.7
717	CHEMBL3798953	CC(C)CS(=O)(=O)n(cc1)c(c12)nc(N(CC3)CCN3C)cc2-c(cc4)ccc4CC	11	7.959	3.85	1	-0.289	1	0	0	0	-1.273	0	4	-9.9
718	CHEMBL3799120	FC(F)(F)c1ccc(cc1)-c2cc(N(CC3)CCN3C)nc(c24)n(cc4)S(=O)(=O)C(C)C	6	8.222	4.06	1	-0.305	1	0	0	0	-1.305	0	4	-10.9
719	CHEMBL3799529	FC(F)(F)c1ccc(cc1)-c2cc(N3CCNCC3)nc(c24)n(cc4)S(=O)(=O)CC(C)C	3	8.523	3.97	1	-0.311	1	0	0	0	-1.279	0	3	-10.5
720	CHEMBL3799547	c1cccc(c1C(F)(F)F)-c2cc(N(CC3)CCN3C)nc(c24)n(cc4)S(=O)(=O)CC(C)C	24	7.62	4.31	1	-0.316	1	0	0	0	-1.269	0	4	-10.8
721	CHEMBL3799638	CC(C)CS(=O)(=O)n(cc1)c(c12)nc(N(CC3)CCN3C)cc2-c4ccccc4	16	7.796	3.29	3	-0.303	1	0	0	0	-1.314	0	4	-10.3
722	CHEMBL3800153	FC(F)(F)c1ccc(cc1)-c2cc(nc(c23)n(cc3)S(=O)(=O)C)N(CC4)CCN4C	54	7.268	3.28	1	-0.295	1	0	0	0	-1.283	0	4	-10.4
723	CHEMBL3800251	CC(C)CS(=O)(=O)n(cc1)c(c12)nc(N(CC3)CCN3C)cc2-c(c4C)cc(s4)C	12	7.921	3.97	1	-1.143	1	0	0	0	-1.457	0	4	-9.5
724	CHEMBL3800539	CC(C)CS(=O)(=O)n(cc1)c(c12)nc(N(CC3)CCN3C)cc2-c4ccc(O)cc4	22	7.658	2.99	1	-0.262	1	0	0	0	-1.219	0	4	-10
725	CHEMBL3800576	CC(C)CS(=O)(=O)n(cc1)c(c12)nc(N(CC3)CCN3C)cc2-c4cnn(C)c4	87	7.06	2.02	1	-0.239	1	0	0	0	-1.226	0	6	-9.3
726	CHEMBL380777	Cc(n1)oc(c1C)S(=O)(=O)n(c(c23)cccc3)cc2C4=CCCNC4	58	7.237	2.86	1	-1.101	1	1	0	0	-1.545	0	2	-10.1
727	CHEMBL381415	CNc1cccc(c12)n(cc2)S(=O)(=O)c(cc3)ccc3N	21	7.678	2.5	3	-1.566	1	0	0	0	-1.72	0	1	-8.5
728	CHEMBL381871	FC(F)(F)c1cc(ccc1)S(=O)(=O)n(c(c23)cccc3)cc2C4=CCCNC4	44.7	7.35	4.27	2	-1.453	1	1	0	0	-1.945	0	1	-11.4
729	CHEMBL381887	N1CCC[C@H]1Cc2cn(c(c23)cccc3)S(=O)(=O)c4ccc(s4)Br	20	7.699	4	2	-1.848	1	1	0	0	-2.328	0	1	-9.2
730	CHEMBL382297	Clc1c(Cl)ccc(c1)S(=O)(=O)n(c(c23)cccc3)cc2C4=CCCNC4	48	7.319	4.56	2	-1.547	1	1	0	0	-1.983	0	1	-10.2
731	CHEMBL383354	CNc(cc1)cc(c12)n(cc2)S(=O)(=O)c(cc3)ccc3N	7	8.155	2.5	2	-1.556	1	0	0	0	-1.72	0	1	-8.5
732	CHEMBL38409	c1cccc(c12)C(=O)N(C2=O)CCCCCCN3CCN(CC3)c4nsc(c45)cccc5	160	6.796	4.27	7	-0.793	1	0	1	0	-0.811	0	4	-10.1
733	CHEMBL385330	CCN(CC)CCc1cn(c(c12)cccc2)S(=O)(=O)c3ccccc3	14	7.854	3.76	1	-1.476	1	1	1	0	-1.602	0	2	-8.7
734	CHEMBL3883443	c1ccccc1CN(C)CCN2CCN(CC2)c3cccc(c34)n(cc4)S(=O)(=O)c5ccccc5	15	7.824	4.13	5	-1.477	2	0	1	0	-2.498	0	4	-10.7
735	CHEMBL3884154	c1ccccc1CNCCCN2CCN(CC2)c3cccc(c34)n(cc4)S(=O)(=O)c5ccccc5	16	7.796	4.18	8	-1.447	2	0	1	0	-2.482	0	3	-11.2
736	CHEMBL3885452	c1ccccc1CNCCN2CCN(CC2)c3cccc(c34)n(cc4)S(=O)(=O)c5ccccc5	12	7.921	3.79	5	-1.476	2	0	1	0	-2.492	0	3	-10.9
737	CHEMBL3895173	CN[C@@H]1[C@H](CCO)c(c12)ccc3c2ccn3S(=O)(=O)c4ccccc4	7.943	8.1	2.62	1	-1.464	1	1	0	0	-1.623	0	1	-9.4
738	CHEMBL39	NCCc1c[nH]c(c12)ccc(c2)O	42.3333	7.373	1.37	3	0	1	0	0	0	-0.849	0	0	-6.2
739	CHEMBL3904094	N#Cc1ccc(cc1)CNC(=O)CCOCCN2CCN(CC2)c(nccc3)c3-c4ccccc4	1633	5.787	3.47	5	0	2	1	1	0	-1.548	1	4	-9.8
740	CHEMBL3908917	OCC[C@@H]1[C@H](NC)c(c12)ccc3c2ccn3S(=O)(=O)c4ccccc4	25.12	7.6	2.62	1	-1.423	1	1	0	0	-1.64	0	1	-9.4
741	CHEMBL3910287	CC(=O)Nc(cc1)ccc1CCN(C)CC2Cc(c23)ccc4c3ccn4S(=O)(=O)c5ccccc5	79.43	7.1	4.65	4	-1.458	1	1	0	0	-2.244	0	2	-12.2
742	CHEMBL3914155	N#Cc1ccc(cc1)CNC(=O)CCOCCN2CCN(CC2)c(cccc3)c3-c4ccccc4	148	6.83	4.07	5	0	2	1	1	0	-1.702	1	3	-10.1
743	CHEMBL391517	C1NCCCC1n(c(c23)nccc3)cc2S(=O)(=O)c4cc(Cl)cc(Cl)c4	6.1	8.215	4.1	3	-2.102	1	1	0	0	-2.602	0	2	-9.7
744	CHEMBL3916787	OCC[C@H]1[C@@H](N(C)C)c(c12)cc3c(c2)n(cc3)S(=O)(=O)c4ccccc4	39.81	7.4	2.96	1	-1.458	1	1	0	0	-1.635	0	2	-9.4
745	CHEMBL391713	CCN(C1)CCCC1n(c(c23)nccc3)cc2S(=O)(=O)c4cc(Cl)cc(Cl)c4	13.5	7.87	4.83	2	-2.09	1	1	1	0	-2.523	0	3	-9.5
746	CHEMBL3922670	N#Cc1ccc(cc1)CNC(=O)CCOCCN2CCN(CC2)c(nccc3)c3-c4ccc(F)cc4	1621	5.79	3.6	5	0	2	1	1	0	-1.401	1	4	-9.8
747	CHEMBL3923145	c1cnccc1CNC(=O)CCOCCN2CCN(CC2)c(cccc3)c3-c4ccccc4	2518	5.599	3.59	6	0	2	1	1	0	-1.799	1	3	-9.4
748	CHEMBL392318	CN(C1)CCC1n(c(c23)nccc3)cc2S(=O)(=O)C(=C(Cl)N4)N(C45)C=CS5	0.8	9.097	2.46	2	-2.485	2	1	0	0	-2.817	0	4	-9.2
749	CHEMBL392541	CCN(C1)CCC1n(c(c23)nccc3)cc2S(=O)(=O)C(=C(Cl)N4)N(C45)C=CS5	1.4	8.854	2.85	2	-2.538	2	1	1	0	-2.869	0	4	-9.1
750	CHEMBL392746	CCN(C1)CCCC1n(c(c23)nccc3)cc2S(=O)(=O)C(=C(Cl)N4)N(C45)C=CS5	0.7	9.155	3.24	2	-2.513	2	1	1	0	-2.955	0	4	-9.7
751	CHEMBL392760	c1cccc(c12)n(cc2CCN)S(=O)(=O)c(c(n3)Cl)n(c34)ccs4	2	8.699	2.74	2	-2.297	1	1	0	0	-2.417	0	3	-8.2
752	CHEMBL392844	c1cccc(c12)n(cc2CCN)S(=O)(=O)c3c(I)cccc3	16	7.796	2.98	1	-1.471	1	1	0	0	-1.597	0	1	-8.4
753	CHEMBL392899	C1NCCCC1n(c(c23)nccc3)cc2S(=O)(=O)c(cc4F)ccc4	2.4	8.62	2.93	1	-1.93	1	1	0	0	-2.43	0	2	-9.6
754	CHEMBL392976	CCN(C1)CCCC1n(c(c23)nccc3)cc2S(=O)(=O)c4ccc(s4)Cl	3.2	8.495	4.24	1	-2.397	1	1	1	0	-2.843	0	3	-9.2
755	CHEMBL393106	CN(C1)CCCC1n(c(c23)nccc3)cc2S(=O)(=O)c(cc4F)ccc4	4.7	8.328	3.27	2	-1.918	1	1	0	0	-2.35	0	3	-9.7
756	CHEMBL393107	CC(C)N(C1)CCCC1n(c(c23)nccc3)cc2S(=O)(=O)c(cc4F)ccc4	3.4	8.469	4.05	1	-1.923	1	1	0	0	-2.37	0	3	-10.2
757	CHEMBL393312	CN(C1)CCC1n(c(c23)nccc3)cc2S(=O)(=O)c(cc4F)ccc4	1.4	8.854	2.88	1	-1.919	1	1	0	0	-2.251	0	3	-9
758	CHEMBL393830	C1NCCCC1n(c(c23)nccc3)cc2S(=O)(=O)c4c(Cl)cccc4	3.7	8.432	3.45	1	-2.087	1	1	0	0	-2.589	0	2	-9.5
759	CHEMBL393997	C1NCCCC1n(c(c23)nccc3)cc2S(=O)(=O)c4cc(Cl)ccc4	1.3	8.886	3.45	2	-2.074	1	1	0	0	-2.576	0	2	-10.2
760	CHEMBL394231	CN(C1)CCC1n(c(c23)nccc3)cc2S(=O)(=O)c4ccc(Cl)cc4	4.2	8.377	3.4	2	-2.069	1	1	0	0	-2.401	0	3	-9.3
761	CHEMBL394232	CCN(C1)CCC1n(c(c23)nccc3)cc2S(=O)(=O)c(cc4F)ccc4	8.3	8.081	3.27	1	-1.914	1	1	1	0	-2.245	0	3	-9.2
762	CHEMBL394302	c1cccc(c12)n(cc2CCN)S(=O)(=O)c(cc3)ccc3F	21	7.678	2.52	2	-1.344	1	1	0	0	-1.47	0	1	-8.9
763	CHEMBL394303	c1cccc(c12)n(cc2CCN)S(=O)(=O)c(cc3)ccc3C	8	8.097	2.69	2	-1.462	1	1	0	0	-1.587	0	1	-8.9
764	CHEMBL3944687	OCC[C@H]1[C@H](N(C)C)c(c12)cc3c(c2)n(cc3)S(=O)(=O)c4ccccc4	12.59	7.9	2.96	1	-1.453	1	1	0	0	-1.622	0	2	-9.3
765	CHEMBL394689	C1CNCCN1c2cc(C)cc(c23)N(CCO3)S(=O)(=O)c4ccccc4	2.512	8.6	1.99	2	-1.119	1	0	0	0	-1.599	1	2	-9.9
766	CHEMBL3947670	N#Cc1ccc(cc1)CNC(=O)CCOCCN2CCN(CC2)c(cccn3)c3-c4ccc(F)cc4	2815	5.551	3.6	6	0	2	1	1	0	-1.433	1	4	-9.8
767	CHEMBL394949	c1ccccc1S(=O)(=O)N(CCO2)c(c23)cc(Cl)cc3N4CCCNCC4	3.981	8.4	2.73	1	-1.147	1	0	0	0	-1.642	1	2	-9.8
768	CHEMBL395145	c1cccc(c12)n(cc2CCN)S(=O)(=O)c(c3)ccc(Cl)c3Cl	30	7.523	3.69	1	-1.539	1	1	0	0	-1.664	0	1	-9.3
769	CHEMBL395465	CN(C)CCc1cn(c(c12)cccc2)Cc3ccc(C)cc3	29	7.538	4.1	2	0	1	0	0	0	-1.497	0	2	-8.6
770	CHEMBL3959964	OCC[C@H]1[C@@H](NC)c(c12)cc3c(c2)n(cc3)S(=O)(=O)c4ccccc4	10	8	2.62	2	-1.466	1	1	0	0	-1.639	0	1	-8.8
771	CHEMBL396329	CN(C)CCc1cn(c(c12)cccc2)S(=O)(=O)c3ccc(Cl)cc3	94	7.027	3.64	2	-1.505	1	1	0	0	-1.63	0	2	-9
772	CHEMBL3971039	OCC[C@@H]1[C@H](NC)c(c12)cc3c(c2)ccn3S(=O)(=O)c4ccccc4	125.89	6.9	2.62	2	-1.478	1	1	0	0	-1.644	0	1	-9.1
773	CHEMBL397380	CCCCS(=O)(=O)n(c(c12)cccc2)cc1CCN(C)C	135	6.87	2.72	2	-0.611	1	1	0	0	-0.735	0	2	-7.6
774	CHEMBL398035	c1cccc(Cl)c1S(=O)(=O)N(CCO2)c(c23)cccc3N4CCNCC4	3.162	8.5	2.34	2	-1.173	1	0	0	0	-1.57	1	2	-10.1
775	CHEMBL398808	C1NCCC1n(c(c23)nccc3)cc2S(=O)(=O)c4ccc(Cl)cc4	5.5	8.26	3.06	1	-2.083	1	1	0	0	-2.469	0	2	-9.8
776	CHEMBL399013	CN(C1)CCC1n(c(c23)nccc3)cc2S(=O)(=O)c4ccccc4	2.5	8.602	2.75	1	-2.046	1	1	0	0	-2.381	0	3	-8.8
777	CHEMBL400608	C1NCCC1n(c(c23)nccc3)cc2S(=O)(=O)c(ccc4)c(c45)nccc5	5.7	8.244	2.95	1	-1.944	1	1	0	0	-2.492	0	3	-10
778	CHEMBL400627	C1NCCC1n(c(c23)nccc3)cc2S(=O)(=O)c(cc4F)ccc4	2.7	8.569	2.54	1	-1.936	1	1	0	0	-2.317	0	2	-9.8
779	CHEMBL401018	FC(F)(F)c1cc(ccc1)S(=O)(=O)c2cn(c(c23)nccc3)C4CCCN(C)C4	2.1	8.678	4.15	2	-2.026	1	1	0	0	-2.455	0	3	-10.7
780	CHEMBL401019	C1NCCCC1n(c(c23)nccc3)cc2S(=O)(=O)c(c4F)cccc4	2	8.699	2.93	1	-1.931	1	1	0	0	-2.435	0	2	-9.4
781	CHEMBL401969	CNc(cc1)ccc1C(C)(C2=O)C(=O)Nc(c23)cc(Cl)cc3Cl	257	6.59	4.13	1	0	1	0	0	0	-0.656	0	0	-9.7
782	CHEMBL402810	c1ccccc1C(C)(C2=O)C(=O)Nc(c23)cc(cc3Cl)OC	344.6	6.463	3.44	2	0	0	0	0	0	-0.487	1	0	-8.7
783	CHEMBL403843	c1cc(Br)ccc1C(C)(C2=O)C(=O)Nc(c23)cc(Cl)cc3Cl	304	6.517	4.85	1	0	0	0	0	0	-0.569	0	0	-8.2
784	CHEMBL404421	COc(c1)ccc(c12)[nH]c(CC)c2C[C@@H]3CCCN3C	220	6.658	3.38	4	0	1	0	0	0	-1.152	1	1	-7.6
785	CHEMBL404552	c1ccccc1C(C)(C2=O)C(=O)Nc(c23)cc(OC)cc3OC	728	6.138	2.8	1	0	0	0	0	0	-0.355	2	0	-9.1
786	CHEMBL4059662	C1CN(C)CCN1Cc2cn(c(c23)cccc3)S(=O)(=O)c(ccc4)cc4OC	29.4	7.532	2.63	1	-1.375	2	1	1	0	-1.8	1	3	-9.3
787	CHEMBL4059916	c1ccc(F)cc1Cc2nc(N)nc(n2)N(CC3)CCN3C	64	7.194	0.94	2	0	1	0	0	0	-0.517	0	5	-8.4
788	CHEMBL4060415	C1CN(C)CCN1Cc2cn(c(c23)ccc(Cl)c3)S(=O)(=O)c(cc4)ccc4F	17.5	7.757	3.42	2	-1.317	2	1	1	0	-1.758	0	3	-10
789	CHEMBL4060649	Cc1cc(ccc1)S(=O)(=O)NCCCN(CC2)CC=C2c3c[nH]c(c34)ccc(F)c4	60	7.222	4.07	5	-0.819	2	2	1	0	-1.952	0	1	-10
790	CHEMBL4062687	C1CN(C)CCN1Cc2cn(c(c23)cccc3)S(=O)(=O)c4ccccc4	6	8.222	2.63	2	-1.463	2	1	1	0	-1.893	0	3	-9.6
791	CHEMBL4063362	CC(C)c1ccc(cc1)S(=O)(=O)n(c(c23)ccc(Br)c3)cc2CN4CCN(C)CC4	27.6	7.559	4.51	1	-1.39	2	1	1	0	-1.816	0	3	-10.1
792	CHEMBL4063897	C1CC(N)Cc(c12)cccc2NS(=O)(=O)c3ccccc3	49	7.31	2.3	3	-1.254	1	1	0	0	-1.629	0	0	-9.1
793	CHEMBL4064995	C1CN(C)CCN1Cc2cn(c(c23)ccc(c3)OC)S(=O)(=O)c4ccc(Br)cc4	10.3	7.987	3.4	1	-1.526	2	1	1	0	-1.757	1	3	-9.7
794	CHEMBL4066047	CC(C)c1ccc(cc1)S(=O)(=O)n(c(c23)cc(cc3)OC)cc2CN4CCN(C)CC4	36.1	7.442	3.76	2	-1.26	2	1	1	0	-1.764	1	3	-10.4
795	CHEMBL4066125	C1CN(C)CCN1Cc2cn(c(c23)ccc(F)c3)S(=O)(=O)c4c(Br)cccc4	12	7.921	3.53	2	-1.483	2	1	1	0	-1.745	0	3	-9.6
796	CHEMBL4066971	c1ccc(cc1O)S(=O)(=O)NCCCCN(CC2)CC=C2c3c[nH]c(c34)ccc(Cl)c4	330	6.481	4.37	6	-0.742	2	2	1	0	-2.005	0	1	-10.4
797	CHEMBL4068056	CC(C)c1ccc(cc1)S(=O)(=O)n(c(c23)ccc(c3)OC)c(Cl)c2CN4CCN(C)CC4	29.6	7.529	4.41	0	-1.566	2	1	1	0	-1.803	1	3	-10.1
798	CHEMBL4068577	c1ccc(OC)cc1Cc2nc(N)nc(n2)N(CC3)CCN3C	158	6.801	0.8	2	0	1	0	0	0	-0.585	1	5	-8.2
799	CHEMBL4069104	C1CN(C)CCN1Cc2cn(c(c23)cccc3)S(=O)(=O)c(c4OC)cc(cc4)OC	91	7.041	2.64	1	-1.274	2	1	1	0	-1.725	2	3	-9.1
800	CHEMBL4069315	c1cccc(Br)c1C(=O)n(c(c23)ccc(F)c3)cc2CN4CCN(C)CC4	326	6.487	3.98	2	0	2	1	1	0	-1.576	0	3	-9.9
801	CHEMBL4069360	N#Cc1ccc(cc1)S(=O)(=O)n(c(c23)cccc3)cc2CN4CCN(C)CC4	90.5	7.043	2.5	3	-1.264	2	1	1	0	-1.689	0	4	-10.2
802	CHEMBL4070284	C1CN(C)CCN1Cc2cn(c(c23)cccc3)S(=O)(=O)c(cc4)ccc4F	8.76	8.057	2.76	1	-1.34	2	1	1	0	-1.764	0	3	-9.5
803	CHEMBL4070785	CCN1CCN(CC1)Cc2cn(S(=O)(=O)c(cc3)ccc3F)c(c24)ccc(c4)OC	20	7.699	3.16	1	-1.414	2	1	2	0	-1.651	1	3	-9.8
804	CHEMBL4070850	C1CN(C)CCN1Cc2cn(c(c23)ccc(c3)OC)S(=O)(=O)c(cc4)ccc4OC	18.3	7.738	2.64	1	-1.468	2	1	1	0	-1.702	2	3	-9.4
805	CHEMBL4071451	c1cccc(c12)ccc(c2)S(=O)(=O)NCCN(CC3)CC=C3c4c[nH]c(c45)ccc(F)c5	67	7.174	4.53	7	-0.783	2	2	1	0	-2.199	0	1	-11.7
806	CHEMBL4071816	CC(C)c1ccc(cc1)S(=O)(=O)n(c(c23)cccc3Cl)cc2CN4CCN(C)CC4	9.2	8.036	4.4	1	-1.434	2	1	1	0	-1.866	0	3	-10.2
807	CHEMBL4073450	C1CNCCN1Cc2cn(S(=O)(=O)c(cc3)ccc3F)c(c24)ccc(c4)OC	6.9	8.161	2.43	1	-1.428	2	1	1	0	-1.681	1	2	-9.6
808	CHEMBL4073586	C1CN(C)CCN1Cc2cn(S(=O)(=O)c(cc3)ccc3F)c(c24)ccc(c4)OC	5	8.301	2.77	3	-1.413	2	1	1	0	-1.642	1	3	-9.9
809	CHEMBL4074058	C1CN(C)CCN1Cc2cn(c(c23)cccc3)S(=O)(=O)c4c(Br)cccc4	10.2	7.991	3.39	2	-1.443	2	1	1	0	-1.868	0	3	-9.1
810	CHEMBL4074234	C1CN(C)CCN1Cc2cn(c(c23)cccc3)S(=O)(=O)c4c(Cl)cc(Cl)cc4	28.2	7.55	3.93	2	-1.529	2	1	1	0	-1.953	0	3	-10
811	CHEMBL4074732	C1CN(C)CCN1Cc2cn(S(=O)(=O)c(cc3)ccc3F)c(c24)cccc4OC	18.4	7.735	2.77	1	-1.16	2	1	1	0	-1.629	1	3	-9.5
812	CHEMBL4075144	c1ccc(cc1F)S(=O)(=O)NCCCN(CC2)CC=C2c3c[nH]c(c34)ccc(Cl)c4	200	6.699	4.42	5	-0.703	2	2	1	0	-1.975	0	1	-10.5
813	CHEMBL4075422	c1ccccc1N(CC2)CCN2CCC3CCN(CC3)S(=O)(=O)c4cncc(c45)cccc5	2412	5.618	3.85	11	-1.17	2	2	1	0	-2.178	0	4	-11
814	CHEMBL4075673	Cc1cc(ccc1)S(=O)(=O)NCCCCN(CC2)CC=C2c3c[nH]c(c34)ccc(F)c4	250	6.602	4.46	6	-0.825	2	2	1	0	-1.957	0	1	-9.7
815	CHEMBL4075727	c1cc(Cl)ccc1Cc2nc(N)nc(n2)N(CC3)CCN3C	52	7.284	1.45	3	0	1	0	0	0	-0.683	0	5	-8.3
816	CHEMBL4076408	c1ccc(Cl)cc1N(CC2)CCN2CCC3CCN(CC3)S(=O)(=O)c4cccc(c45)nccc5	445	6.352	4.5	8	-1.319	2	2	1	0	-2.281	0	4	-10.9
817	CHEMBL4076525	c1cc(F)ccc1N(CC2)CCN2CCC3CCN(CC3)S(=O)(=O)c4cccc(c45)nccc5	1459	5.836	3.99	9	-1.312	2	2	1	0	-2.123	0	4	-11.4
818	CHEMBL4077040	Cc1cc(ccc1)S(=O)(=O)NCCCN(CC2)CC=C2c3c[nH]c(c34)ccc(Cl)c4	36	7.444	4.59	6	-0.827	2	2	1	0	-2.095	0	1	-10.4
819	CHEMBL4077077	c1cccc(Cl)c1Cc2nc(N)nc(n2)N(CC3)CCN3C	56	7.252	1.45	3	0	1	0	0	0	-0.686	0	5	-8.3
820	CHEMBL4077537	C1CNCCN1Cc2cn(c(c23)cccc3)S(=O)(=O)c4c(Br)cccc4	4.5	8.347	3.05	1	-1.461	2	1	1	0	-1.905	0	2	-9.3
821	CHEMBL4077937	Fc1ccc(cc1)S(=O)(=O)NCCCN(CC2)CC=C2c3c[nH]c(c34)ccc(Cl)c4	92	7.036	4.42	5	-0.711	2	2	1	0	-1.972	0	1	-10.1
822	CHEMBL4078873	Cc1cc(ccc1)S(=O)(=O)NCCN(CC2)CC=C2c3c[nH]c(c34)ccc(F)c4	34	7.469	3.68	7	-0.827	2	2	1	0	-1.946	0	1	-10.2
823	CHEMBL4078912	C1CN(C)CCN1Cc2cn(c(c23)cc(Cl)cc3)S(=O)(=O)c4ccccc4	35.7	7.447	3.28	1	-1.468	2	1	1	0	-1.892	0	3	-9.8
824	CHEMBL4079150	c1cccc(F)c1Cc2nc(N)nc(n2)N(CC3)CCN3C	88	7.056	0.94	2	0	1	0	0	0	-0.513	0	5	-8.6
825	CHEMBL4079397	c1cc(C)ccc1Cc2nc(N)nc(n2)N(CC3)CCN3C	64	7.194	1.1	2	0	1	0	0	0	-0.662	0	5	-8.5
826	CHEMBL4079859	C1CN(C)CCN1Cc2cn(c(c23)cccc3)S(=O)(=O)c4cccc(c45)cccc5	11.5	7.939	3.78	1	-1.594	2	1	1	0	-2.121	0	3	-10.2
827	CHEMBL4079871	CC(C)c1ccc(cc1)S(=O)(=O)n(c(c23)ccc(c3)O)cc2CN4CCN(C)CC4	50	7.301	3.45	1	-1.544	2	1	1	0	-1.821	0	3	-10.2
828	CHEMBL4080086	C1CN(C)CCN1Cc2cn(c(c23)cccc3)S(=O)(=O)c(c4)ccc(F)c4F	119	6.924	2.9	4	-1.18	2	1	1	0	-1.624	0	3	-9.9
829	CHEMBL4080312	c1ccc(C)cc1Cc2nc(N)nc(n2)N(CC3)CCN3C	30	7.523	1.1	2	0	1	0	0	0	-0.654	0	5	-8.6
830	CHEMBL4080369	Cc1cc(ccc1)S(=O)(=O)NCCCCN(CC2)CC=C2c3c[nH]c(c34)ccc(Cl)c4	210	6.678	4.98	6	-0.82	2	2	1	0	-2.09	0	1	-10.5
831	CHEMBL4080398	c1cc(Cl)ccc1N(CC2)CCN2CCC3CCN(CC3)S(=O)(=O)c4cccc(c45)nccc5	1020	5.991	4.5	9	-1.314	2	2	1	0	-2.277	0	4	-11.3
832	CHEMBL4080399	c1ccc(cc1O)S(=O)(=O)NCCCN(CC2)CC=C2c3c[nH]c(c34)ccc(Cl)c4	30	7.523	3.98	5	-0.74	2	2	1	0	-2.009	0	1	-10.6
833	CHEMBL4081987	Cc1cc(ccc1)S(=O)(=O)NCCCN(CC2)CC=C2c3c(C)[nH]c(c34)ccc(Cl)c4	100	7	4.9	8	-0.874	2	2	1	0	-2.098	0	1	-10.5
834	CHEMBL4082319	C1CN(C)CCN1Cc2cn(c(c23)cccc3Cl)S(=O)(=O)c4c(Br)cccc4	23.5	7.629	4.04	2	-1.454	2	1	1	0	-1.9	0	3	-9.9
835	CHEMBL4083289	C1CN(C)CCCN1Cc2cn(c(c23)ccc(c3)OC)S(=O)(=O)c4c(Br)cccc4	5.7	8.244	3.79	1	-1.534	2	1	1	0	-1.854	1	3	-9.4
836	CHEMBL4083893	C1CN(C)CCCN1Cc2cn(S(=O)(=O)c(cc3)ccc3F)c(c24)ccc(c4)OC	7.79	8.108	3.16	1	-1.407	2	1	1	0	-1.737	1	3	-9.6
837	CHEMBL4083959	FC(F)(F)Oc1ccc(cc1)S(=O)(=O)n(c(c23)ccc(c3)OC)cc2CN4CCN(C)CC4	37.8	7.423	3.53	1	-1.382	2	1	1	0	-1.615	2	3	-10.1
838	CHEMBL4085003	CC(C)c1ccc(cc1)S(=O)(=O)n(c(c23)cccc3OC)cc2CN4CCN(C)CC4	11.6	7.936	3.76	1	-1.277	2	1	1	0	-1.729	1	3	-10.1
839	CHEMBL4085349	C1CN(C)CCN1Cc2cn(c(c23)cccc3)S(=O)(=O)c(cc4F)ccc4	58	7.237	2.76	2	-1.339	2	1	1	0	-1.762	0	3	-9.4
840	CHEMBL4085802	c1cc(Cl)ccc1S(=O)(=O)NCCN(CC2)CC=C2c3c[nH]c(c34)ccc(Cl)c4	35	7.456	4.54	5	-0.865	2	2	1	0	-2.135	0	1	-10.6
841	CHEMBL4085949	C1CN(C)CCN1Cc2cn(c(c23)ccc(F)c3)S(=O)(=O)c4ccc(Br)cc4	9.2	8.036	3.53	2	-1.461	2	1	1	0	-1.723	0	3	-9.6
842	CHEMBL4086515	c1cccc(c12)[nH]cc2Cc3nc(N)nc(n3)N(CC4)CCN4C	22	7.658	1.28	1	0	1	0	0	0	-1.06	0	5	-9.1
843	CHEMBL4087852	c1ccc(cc1F)S(=O)(=O)NCCCCN(CC2)CC=C2c3c[nH]c(c34)ccc(Cl)c4	320	6.495	4.81	7	-0.708	2	2	1	0	-1.972	0	1	-10.1
844	CHEMBL4087957	C1CN(C)CCN1Cc2cn(c(c23)cccc3)S(=O)(=O)c(cc4)ccc4C	9.6	8.018	2.93	2	-1.449	2	1	1	0	-1.935	0	3	-10.2
845	CHEMBL4088170	c1cc(F)ccc1Cc2nc(N)nc(n2)N(CC3)CCN3C	100	7	0.94	3	0	1	0	0	0	-0.541	0	5	-8.2
846	CHEMBL4090168	C1CN(C)CCN1Cc2cn(c(c23)cccc3)S(=O)(=O)c4c(Cl)cc(F)cc4	29	7.538	3.42	2	-1.372	2	1	1	0	-1.798	0	3	-9.9
847	CHEMBL4090177	C1CN(C)CCN1Cc2cn(c(c23)ccc(c3)O)S(=O)(=O)c4c(Br)cccc4	18.7	7.728	3.09	2	-1.556	2	1	1	0	-1.772	0	3	-9.2
848	CHEMBL4090395	C1CN(C)CCN1Cc2cn(c(c23)cccc3)S(=O)(=O)c(c4F)ccc(F)c4	30	7.523	2.9	2	-1.19	2	1	1	0	-1.62	0	3	-10
849	CHEMBL4091082	C1CN(C)CCN1Cc2c[nH]c(c23)cccc3	482	6.317	1.92	5	0	2	0	1	0	-1.257	0	2	-7.3
850	CHEMBL4091193	c1ccc(Cl)cc1S(=O)(=O)NCCCN(CC2)CC=C2c3c[nH]c(c34)ccc(Cl)c4	120	6.921	4.93	4	-0.859	2	2	1	0	-2.127	0	1	-10.1
851	CHEMBL4091721	C1CN(C)CCN1Cc2cn(c(c23)ccc(c3)OC)S(=O)(=O)c(cc4)ccc4C	15.5	7.81	2.94	1	-1.534	2	1	1	0	-1.772	1	3	-10.1
852	CHEMBL4092243	c1cccc(c12)ccc(c2)S(=O)(=O)NCCCN(CC3)CC=C3c4c[nH]c(c45)ccc(F)c5	250	6.602	4.92	8	-0.782	2	2	1	0	-2.201	0	1	-11.1
853	CHEMBL4092681	C1CN(C)CCN1Cc2cn(c(c23)ccc(c3)OC)S(=O)(=O)c4cccc(c45)cccc5	7.8	8.108	3.79	3	-1.672	2	1	1	0	-2.009	1	3	-10.4
854	CHEMBL4093110	C1CN(C)CCN1Cc2cn(c(c23)cccc3)S(=O)(=O)c4cc(Cl)ccc4	16.3	7.788	3.28	1	-1.477	2	1	1	0	-1.905	0	3	-10.1
855	CHEMBL4093699	CC(C)c1ccc(cc1)S(=O)(=O)n(c(c23)ccc(F)c3)cc2CN4CCN(C)CC4	4	8.398	3.89	1	-1.471	2	1	1	0	-1.728	0	3	-10.6
856	CHEMBL4095054	C1CNCCN1Cc2cn(c(c23)cccc3)S(=O)(=O)c4ccccc4	7.5	8.125	2.28	1	-1.47	2	1	1	0	-1.924	0	2	-9.1
857	CHEMBL4095446	C1CN(C)CCN1Cc2c(C)n(c(c23)cccc3)S(=O)(=O)c(cc4)ccc4F	55.6	7.255	3.07	2	-1.319	2	1	1	0	-1.741	0	3	-10.1
858	CHEMBL4095670	C1CN(C)CCN1Cc2cn(c(c23)cccc3)S(=O)(=O)c(cc4)ccc4OC	25.1	7.6	2.63	1	-1.391	2	1	1	0	-1.818	1	3	-9.5
859	CHEMBL4095896	COc(cc1)ccc1Cc2nc(N)nc(n2)N(CC3)CCN3C	440	6.357	0.8	3	0	1	0	0	0	-0.576	1	5	-8
860	CHEMBL4095979	Fc1ccc(cc1)S(=O)(=O)NCCCCN(CC2)CC=C2c3c[nH]c(c34)ccc(Cl)c4	300	6.523	4.81	6	-0.711	2	2	1	0	-1.982	0	1	-10.4
861	CHEMBL4097459	CC(C)c1ccc(cc1)S(=O)(=O)n(c(c23)cccc3)cc2CN4CCN(C)CC4	6	8.222	3.75	1	-1.464	2	1	1	0	-1.89	0	3	-10.4
862	CHEMBL4097856	c1ccccc1Cc2nc(N)nc(n2)N(CC3)CCN3C	95	7.022	0.8	1	0	1	0	0	0	-0.688	0	5	-8
863	CHEMBL4097882	C1CN(C)CCN1Cc2cn(c(c23)cccc3)S(=O)(=O)c(c4C)cc(C)cc4	64	7.194	3.24	2	-1.417	2	1	1	0	-1.841	0	3	-10.2
864	CHEMBL4097893	C1CN(C)CCN1Cc2cn(c(c23)ccc(c3)O)S(=O)(=O)c(cc4)ccc4F	34.9	7.457	2.47	1	-1.444	2	1	1	0	-1.659	0	3	-9.4
865	CHEMBL4098120	C1CN(C)CCN1Cc2cn(c(c23)cccc3)S(=O)(=O)c4c(F)cccc4F	64	7.194	2.9	2	-1.184	2	1	1	0	-1.611	0	3	-9.8
866	CHEMBL4098336	c1cccc(C)c1Cc2nc(N)nc(n2)N(CC3)CCN3C	80	7.097	1.1	3	0	1	0	0	0	-0.651	0	5	-8.4
867	CHEMBL4098815	C1CN(C)CCN1Cc2cn(c(c23)cccc3Cl)S(=O)(=O)c(cc4)ccc4F	31.2	7.506	3.42	3	-1.337	2	1	1	0	-1.766	0	3	-10.1
868	CHEMBL4100411	C1CN(C)CCN1Cc2cn(c(c23)ccc(c3)OC)S(=O)(=O)c4ccccc4	4.3	8.367	2.63	1	-1.548	2	1	1	0	-1.786	1	3	-9.4
869	CHEMBL4100818	C1CN(C)CCN1Cc2cn(c(c23)cccc3)S(=O)(=O)c4cc(Br)ccc4	19	7.721	3.39	1	-1.43	2	1	1	0	-1.859	0	3	-9.5
870	CHEMBL4101418	C1CN(C)CCN1Cc2cn(c(c23)cccc3OC)S(=O)(=O)c4c(Br)cccc4	14.3	7.845	3.4	2	-1.282	2	1	1	0	-1.745	1	3	-8.9
871	CHEMBL4101944	C1CN(C)CCN1Cc2nn(c(c23)ccc(c3)OC)S(=O)(=O)c4c(Br)cccc4	348	6.458	2.79	1	-1.366	2	1	1	1	-1.61	1	4	-9.8
872	CHEMBL4103190	C1CN(C)CCN1Cc2cn(c(c23)cc(Cl)cc3)S(=O)(=O)c4ccc(Br)cc4	59.7	7.224	4.04	2	-1.446	2	1	1	0	-1.873	0	3	-9.6
873	CHEMBL4103281	C1CN(C)CCN1Cc2cn(c(c23)cccc3)S(=O)(=O)c(c4F)cccc4	7.8	8.108	2.76	2	-1.335	2	1	1	0	-1.765	0	3	-9.7
874	CHEMBL4103397	c1cc(Cl)c(Cl)cc1Cc2nc(N)nc(n2)N(CC3)CCN3C	32	7.495	2.1	2	0	1	0	0	0	-0.709	0	5	-8.5
875	CHEMBL4103475	C1CN(C)CCN1Cc2cn(c(c23)cccc3)Cc4c(Br)cccc4	312	6.506	4.2	2	0	2	0	1	0	-1.749	0	3	-8.7
876	CHEMBL4103656	c1cccc(OC)c1Cc2nc(N)nc(n2)N(CC3)CCN3C	193	6.714	0.81	2	0	1	0	0	0	-0.553	1	5	-8.1
877	CHEMBL4103725	c1cc(Cl)ccc1S(=O)(=O)NCCCN(CC2)CC=C2c3c[nH]c(c34)ccc(Cl)c4	180	6.745	4.93	6	-0.871	2	2	1	0	-2.14	0	1	-10.5
878	CHEMBL4103877	C1CN(C)CCN1Cc2cn(c(c23)ccc(Br)c3)S(=O)(=O)c(cc4)ccc4F	17	7.77	3.53	1	-1.282	2	1	1	0	-1.709	0	3	-10
879	CHEMBL4104479	c1ccc(Cl)cc1Cc2nc(N)nc(n2)N(CC3)CCN3C	28	7.553	1.45	2	0	1	0	0	0	-0.657	0	5	-8.4
880	CHEMBL4104596	Cc1cc(ccc1)S(=O)(=O)NCCN(CC2)CC=C2c3c(C)[nH]c(c34)ccc(Cl)c4	130	6.886	4.51	6	-0.823	2	2	1	0	-2.049	0	1	-10.4
881	CHEMBL4105377	CC(C)c1ccc(cc1)S(=O)(=O)n(c(c23)ccc(c3)OC)cc2CN4CCNCC4	5.7	8.244	3.42	1	-1.531	2	1	1	0	-1.785	1	2	-9.7
882	CHEMBL410710	c1ccccc1C(=O)n(c(c23)cccc3)cc2C4=CCN(C)CC4	99	7.004	4.05	3	0	1	1	0	0	-1.705	0	2	-10.2
883	CHEMBL4125735	c1ccc(Cl)cc1S(=O)(=O)n(cc2)c(c23)c4c(cccc4)nc3N[C@H]5CCNC5	3	8.523	3.85	2	-1.435	2	0	0	0	-2.127	0	2	-10.7
884	CHEMBL4126145	C1CCCCN1CCCCCOc2cccc(c23)cccc3	2539	5.595	4.87	7	0	1	0	1	0	-1.164	1	1	-8
885	CHEMBL4126633	c1ccc(Cl)cc1S(=O)(=O)n(c(c23)c4c(cc3)cccn4)cc2C5=CCNCC5	49	7.31	4.46	2	-1.332	1	1	0	0	-2.028	0	2	-10.6
886	CHEMBL4128013	c1ccc(Br)cc1S(=O)(=O)n(c(c23)c4c(cc3)cccn4)cc2C5=CCNCC5	61	7.215	4.57	1	-1.285	1	1	0	0	-1.978	0	2	-10.4
887	CHEMBL4129259	n1cccc(cc2)c1c(c23)n(S(=O)(=O)c(cc4F)ccc4)cc3C5=CCNCC5	45	7.347	3.94	2	-1.163	1	1	0	0	-1.864	0	2	-10.9
888	CHEMBL413525	CN1CCC[C@H]1Cc2cn(c(c23)cccc3)S(=O)(=O)c4ccc(s4)Cl	4	8.398	4.23	1	-1.87	1	1	0	0	-2.328	0	2	-8.9
889	CHEMBL415	CN(C)CCCN(c(c12)cc(Cl)cc1)c3c(CC2)cccc3	112	6.951	4.53	7	0	1	0	0	0	-1.203	0	2	-8.4
890	CHEMBL415046	NCCc1cc(ccc1)S(=O)(=O)Nc2ccccc2	70	7.155	1.99	4	-1.24	1	1	0	0	-1.365	0	0	-7.8
891	CHEMBL4159555	c1ccccc1Cn(cn2)c(c23)nccc3N4CCNCC4	110	6.959	1.89	1	0	1	0	0	1	-1.548	0	4	-8.5
892	CHEMBL4160798	c1ccc(Cl)cc1CCn(c(n2)CC)c(c23)nccc3N4CCNCC4	42	7.377	3.3	5	0	1	0	0	0	-1.555	0	4	-9
893	CHEMBL4160888	c1ccc(Cl)cc1Cn(c(n2)C(CC)CC)c(c23)nccc3N4CCNCC4	30	7.523	4.45	1	0	1	0	0	0	-1.561	0	4	-9.9
894	CHEMBL4161125	c1ccc(Cl)cc1Cn(c(n2)C)c(c23)nccc3N4CCNCC4	21	7.678	2.85	0	0	1	0	0	0	-1.552	0	4	-9.4
895	CHEMBL4161308	c1ccc(Cl)cc1Cn(c(n2)C(C)C)c(c23)nccc3N4CCNCC4	20	7.699	3.67	1	0	1	0	0	0	-1.564	0	4	-9.8
896	CHEMBL4162914	c1ccc(Cl)cc1Cn(c(n2)C)c(c23)ccnc3N4CCNCC4	254	6.595	2.85	1	0	1	0	0	0	-1.52	0	4	-9.4
897	CHEMBL4164195	c1ccc(Cl)cc1CCn(c(n2)C)c(c23)nccc3N4CCNCC4	312	6.506	3.05	5	0	1	0	0	0	-1.555	0	4	-9.5
898	CHEMBL4164639	c1ccc(Cl)cc1CCn(cn2)c(c23)nccc3N4CCNCC4	1251	5.903	2.74	5	0	1	0	0	1	-1.582	0	4	-8.8
899	CHEMBL4164725	c1cc(F)ccc1Cn(c(n2)C(C)C)c(c23)nccc3N4CCNCC4	80	7.097	3.15	0	0	1	0	0	0	-1.416	0	4	-9.5
900	CHEMBL4165620	c1ccccc1Cn(c(n2)CC)c(c23)nccc3N4CCNCC4	36	7.444	2.45	0	0	1	0	0	0	-1.553	0	4	-8.7
901	CHEMBL4166040	c1cc(F)c(F)cc1Cn(c(n2)CC)c(c23)nccc3N4CCNCC4	139	6.857	2.73	1	0	1	0	0	0	-1.256	0	4	-9.3
902	CHEMBL4166211	c1ccc(OC)cc1Cn(c(n2)CC(C)(C)C)c(c23)nccc3N4CCNCC4	165	6.783	3.49	0	0	1	0	0	0	-1.446	1	4	-9.9
903	CHEMBL4166372	c1ccc(Cl)cc1Cn(cn2)c(c23)ccnc3N4CCNCC4	320	6.495	2.54	1	0	1	0	0	1	-1.534	0	4	-9.1
904	CHEMBL4167974	c1cccc(Cl)c1Cn(c(n2)CC)c(c23)nccc3N4CCNCC4	177	6.752	3.11	0	0	1	0	0	0	-1.533	0	4	-9
905	CHEMBL4168070	c1cc(F)ccc1-c(n2)n(Cc3cc(F)ccc3)c(c24)nccc4N5CCNCC5	162	6.79	3.83	1	0	1	0	0	0	-1.716	0	4	-11.1
906	CHEMBL4168165	c1cccc(Cl)c1Cn(c(n2)C(CC)CC)c(c23)nccc3N4CCNCC4	108	6.967	4.45	2	0	1	0	0	0	-1.56	0	4	-8.8
907	CHEMBL4169050	FC(F)(F)c1cc(ccc1)Cn(c(n2)C)c(c23)nccc3N4CCNCC4	62	7.208	3.22	4	0	1	0	0	0	-1.466	0	4	-10.1
908	CHEMBL4169236	c1ccc(F)cc1Cn(c(n2)C(C)C)c(c23)nccc3N4CCNCC4	13	7.886	3.15	0	0	1	0	0	0	-1.409	0	4	-9.7
909	CHEMBL4170187	c1ccc(Cl)cc1Cn(cn2)c(c23)nccc3N4CCNCC4	33	7.481	2.54	1	0	1	0	0	1	-1.575	0	4	-9
910	CHEMBL4171417	c1ccc(Cl)cc1CCn(c(n2)C(C)C)c(c23)nccc3N4CCNCC4	80	7.097	3.86	4	0	1	0	0	0	-1.566	0	4	-9.4
911	CHEMBL4171504	c1ccc(C)cc1Cn(c(n2)C(CC)CC)c(c23)nccc3N4CCNCC4	42	7.377	4.1	1	0	1	0	0	0	-1.537	0	4	-10
912	CHEMBL4172073	c1ccc(C)cc1Cn(c(n2)C)c(c23)nccc3N4CCNCC4	26	7.585	2.51	1	0	1	0	0	0	-1.534	0	4	-9.5
913	CHEMBL4172424	c1c(F)ccc(F)c1Cn(c(n2)CC)c(c23)nccc3N4CCNCC4	57	7.244	2.73	1	0	1	0	0	0	-1.254	0	4	-9.3
914	CHEMBL4172521	c1ccc(F)cc1CCn(cn2)c(c23)nccc3N4CCNCC4	1298	5.887	2.22	5	0	1	0	0	1	-1.435	0	4	-9
915	CHEMBL4172620	c1ccc(OC)cc1Cn(c(n2)C(C)C)c(c23)nccc3N4CCNCC4	92	7.036	3.02	0	0	1	0	0	0	-1.435	1	4	-9.3
916	CHEMBL4173336	c1ccccc1Cn(cn2)c(c23)ccnc3N4CCNCC4	450	6.347	1.89	1	0	1	0	0	1	-1.529	0	4	-8.5
917	CHEMBL4173628	c1ccc(Cl)cc1Cn(c(n2)C(C)C)c(c23)ccnc3N4CCNCC4	126	6.9	3.67	2	0	1	0	0	0	-1.53	0	4	-9.7
918	CHEMBL4173960	c1cccc(F)c1Cn(c(n2)C(C)C)c(c23)nccc3N4CCNCC4	61	7.215	3.15	0	0	1	0	0	0	-1.421	0	4	-9.3
919	CHEMBL4174125	c1ccc(C)cc1Cn(c(n2)CC(C)(C)C)c(c23)nccc3N4CCNCC4	142	6.848	3.79	1	0	1	0	0	0	-1.522	0	4	-10.4
920	CHEMBL4174680	c1ccccc1Cn(c(n2)C)c(c23)nccc3N4CCNCC4	101	6.996	2.2	0	0	1	0	0	0	-1.553	0	4	-9
921	CHEMBL4174854	c1ccc(F)cc1CCn(c(n2)CC)c(c23)nccc3N4CCNCC4	56	7.252	2.79	5	0	1	0	0	0	-1.409	0	4	-8.9
922	CHEMBL4176014	c1cc(Cl)ccc1Cn(c(n2)C(C)C)c(c23)nccc3N4CCNCC4	107	6.971	3.67	2	0	1	0	0	0	-1.572	0	4	-9.6
923	CHEMBL4202520	c1cccc(NC2=O)c1C23CCN(C3)CCN(CC4)CCC4c5ccc(F)cc5	5285	5.277	3.6	6	0	2	2	2	0	-1.383	0	2	-11.1
924	CHEMBL4202947	c1cccc(NC2=O)c1C23CCN(C3)CCN(CC4)CC=C4c5ccc(F)cc5	6267	5.203	3.51	6	0	2	2	2	0	-1.334	0	2	-11
925	CHEMBL4203310	c1ccccc1CCN2CCN(CC2)CCOCCOc(c3C)c(C)cc(C)c3	2155	5.667	3.87	6	0	2	0	2	0	-1.28	2	2	-8.5
926	CHEMBL4203581	c1cc(Cl)ccc1C(=O)N2CCN(CC2)CCN(C3)CCC34c5c(NC4=O)cccc5	7746	5.111	2.69	8	0	2	2	2	0	-1.431	0	3	-10.9
927	CHEMBL4206366	c1cccc(NC2=O)c1C23CCN(C3)CCN4CCN(CC4)c5ccccc5	6556	5.183	2.4	6	0	2	2	2	0	-1.47	0	3	-10.3
928	CHEMBL4206881	c1cc(Cl)ccc1N(CC2)CCN2CCCN(C3)CCC34c5c(NC4=O)cccc5	5559	5.255	3.45	7	0	2	2	2	0	-1.472	0	3	-10.7
929	CHEMBL4207653	c1cccc(OC)c1N(CC2)CCN2CCOCCOc(c3C)c(C)cc(C)c3	2427	5.615	3.84	7	0	1	0	1	0	-1.153	3	2	-8.6
930	CHEMBL4207835	c1cccc(NC2=O)c1C23CCN(C3)CCN4CCN(CC4)c5ccc(F)cc5	4744	5.324	2.54	6	0	2	2	2	0	-1.326	0	3	-10.6
931	CHEMBL4207884	C1CNCCc(c12)[nH]nc2-c3ccc(Cl)cc3	248	6.606	2.42	4	0	1	0	0	0	-1.141	0	1	-8.3
932	CHEMBL4208468	c1cccc(NC2=O)c1C23CCN(C3)CCN(CC4)CCC4Oc5ccc(Cl)cc5	1693	5.771	3.78	7	0	2	2	2	0	-1.403	1	2	-11
933	CHEMBL4208934	c1occc1-c(cc2CC)nc(n2)N(CC3)CCN3C	121	6.917	2.05	2	0	1	0	0	0	-0.773	0	4	-7.6
934	CHEMBL4209274	C1CNCCc(c12)[nH]nc2-c3ccc(F)cc3	416	6.381	1.9	4	0	1	0	0	0	-1	0	1	-8.4
935	CHEMBL4209807	c1cccc(NC2=O)c1C23CCN(C3)CCN4CCN(CC4)c5c(Cl)cccc5	2843	5.546	3.06	8	0	2	2	2	0	-1.492	0	3	-10.6
936	CHEMBL4210782	Cc1ccc(cc1)-c2n[nH]c(c23)CCNCC3	109	6.963	2.07	4	0	1	0	0	0	-1.112	0	1	-8.5
937	CHEMBL4211253	c1cccc(NC2=O)c1C23CCN(C3)CCN4CCN(CC4)c5cc(Cl)ccc5	2005	5.698	3.06	6	0	2	2	2	0	-1.472	0	3	-10.5
938	CHEMBL4213352	c1cccc(OC)c1N(CC2)CCN2CCOCCOc3cc(C)cc(C)c3C	1540	5.812	3.84	5	0	1	0	1	0	-1.199	3	2	-8.8
939	CHEMBL4214208	c1cccc(NC2=O)c1C23CCN(C3)CCN(CC4)CCC4c5ccc(Cl)cc5	4577	5.339	4.12	6	0	2	2	2	0	-1.526	0	2	-11.2
940	CHEMBL4214709	c1cccc(NC2=O)c1C23CCN(C3)CCN4CCN(CC4)c(c5)ccc(Cl)c5Cl	1131	5.947	3.71	8	0	2	2	2	0	-1.489	0	3	-10.8
941	CHEMBL4215875	Cc1ccc(cc1)-c2noc(c23)CCNCC3	492	6.308	2.34	3	0	1	0	0	0	-0.883	0	1	-8.4
942	CHEMBL4216126	c1cccc(c1C(C)C)OCCCN(CC2)CCC2NS(=O)(=O)c(cc3)ccc3F	268	6.572	4.16	10	-1.076	2	2	1	0	-1.546	1	1	-9.8
943	CHEMBL4216263	CCn1cncc1-c2c[nH]c(c23)ccc(I)c3	1666.5	5.778	3.66	1	0	0	0	0	1	-1.389	0	2	-7.4
944	CHEMBL4217761	c1ccccc1CCN2CCN(CC2)CCOCCOc3cccc(C)c3C	200	6.699	3.56	6	0	2	0	2	0	-1.334	2	2	-8.4
945	CHEMBL4218625	c1cccc(NC2=O)c1C23CCN(C3)CCN4CCN(CC4)c5ccc(Cl)cc5	4737	5.324	3.06	7	0	2	2	2	0	-1.507	0	3	-10.3
946	CHEMBL4218801	C1CNCCc(c12)onc2-c3ccc(Cl)cc3	360	6.444	2.68	4	0	1	0	0	0	-0.919	0	1	-8.3
947	CHEMBL4238897	c1cccc(c12)snc2N(CC3)CCN3CC[C@H]4CCN4S(=O)(=O)c5cccc(c56)nccc6	344	6.463	3.82	5	-1.754	2	2	1	0	-2.026	0	5	-10.2
948	CHEMBL4239705	c1csc(c12)cccc2N(CC3)CCN3CC[C@H]4CCN4S(=O)(=O)c5cncc(c56)cccc6	104	6.983	4.42	5	-1.803	2	2	1	0	-2.225	0	4	-10.9
949	CHEMBL4243497	c1cccc(c12)snc2N(CC3)CCN3CC[C@H]4CCN4S(=O)(=O)c5cncc(c56)cccc6	348	6.458	3.82	6	-1.681	2	2	1	0	-2	0	5	-10.9
950	CHEMBL4243579	c1cccc(c12)onc2N(CC3)CCN3CC[C@@H]4CCCN4S(=O)(=O)c5cccc(c56)cncc6	92	7.036	3.74	7	-1.233	2	2	1	0	-2.036	0	5	-11.5
951	CHEMBL4243932	c1csc(c12)cccc2N(CC3)CCN3CC[C@H]4CCN4S(=O)(=O)c5cccc(c56)nccc6	130	6.886	4.42	5	-1.92	2	2	1	0	-2.286	0	4	-10.7
952	CHEMBL4245997	c1c[nH]c(c12)cccc2N(CC3)CCN3CC[C@H]4CCCN4S(=O)(=O)c5cncc(c56)cccc6	766	6.116	4.08	7	-1.106	2	2	1	0	-2.476	0	4	-10.5
953	CHEMBL4248597	c1c[nH]c(c12)cccc2N(CC3)CCN3CC[C@H]4CCCN4S(=O)(=O)c5cccc(c56)nccc6	641	6.193	4.08	7	-1.209	2	2	1	0	-2.523	0	4	-10.5
954	CHEMBL4249179	c1cccc(c12)onc2N(CC3)CCN3CC[C@@H]4CCCN4S(=O)(=O)c5cccc(c56)nccc6	291	6.536	3.74	7	-1.196	2	2	1	0	-2.052	0	5	-11.2
955	CHEMBL4249640	c1cccc(c12)onc2N(CC3)CCN3CC[C@@H]4CCCN4S(=O)(=O)c5cncc(c56)cccc6	497	6.304	3.74	7	-1.092	2	2	1	0	-2.001	0	5	-11.4
956	CHEMBL425197	N1CCC[C@H]1Cc2cn(c(c23)cccc3)S(=O)(=O)c4cc(Cl)ccc4	22	7.658	3.83	2	-1.497	1	1	0	0	-1.976	0	1	-9.6
957	CHEMBL425714	c1cccc(c1OC(F)(F)F)S(=O)(=O)c2cn(CCN(C)C)c(c23)cccc3	16	7.796	3.93	1	-1.853	1	1	0	0	-1.95	1	2	-8.7
958	CHEMBL426567	c1ccccc1CN(C)CCc2c[nH]c(c23)ccc(c3)OC	106	6.975	3.85	7	0	1	0	0	0	-1.414	1	1	-8
959	CHEMBL426640	C1CNCCN1c(ccn2)c(c23)[nH]cc3S(=O)(=O)c4ccccc4	7.943	8.1	1.81	1	-1.859	1	0	0	0	-2.328	0	2	-9.4
960	CHEMBL427184	N1CCC[C@H]1Cc2cn(c(c23)cccc3)S(=O)(=O)c(cc4)ccc4N	7	8.155	2.76	1	-1.554	1	1	0	0	-2.036	0	1	-9.3
961	CHEMBL427354	c1ccccc1/C=C/2C=C(CCN(C)C)c(c23)cccc3	57	7.244	4.58	2	0	1	0	0	0	-1.228	0	1	-8.8
962	CHEMBL431298	c1c(Cl)ccc(c12)sc(c2C)S(=O)(=O)Nc(c3)ccc(OC)c3N4CCNCC4	2.57364	8.589	4.08	2	-1.735	1	0	0	0	-1.975	1	1	-9.6
963	CHEMBL433461	CNc1cc(nc(n1)NC)NS(=O)(=O)c(cc2)ccc2N	51.1167	7.291	0.94	3	-1.064	2	0	0	0	-1.064	0	2	-7.7
964	CHEMBL433765	c1ccccc1Cc2cn(c(c23)cccc3)C[C@@H]4CCCN4C	29	7.538	4.33	4	0	1	0	0	0	-1.876	0	2	-9.4
965	CHEMBL433979	Cc1cccc(c12)COC(=O)N2C3CCN(CC3)S(=O)(=O)c4cccc(c45)cccc5	246.2	6.609	4.46	9	-1.312	1	1	0	0	-1.479	1	2	-10.1
966	CHEMBL434365	NCCc1ccc(cc1)NS(=O)(=O)c2ccccc2	38	7.42	1.99	3	-1.253	1	0	0	0	-1.346	0	0	-8
967	CHEMBL434932	CN1CCC[C@H]1Cc2cn(c(c23)cccc3)S(=O)(=O)c4ccc(s4)Br	3	8.523	4.34	1	-1.846	1	1	0	0	-2.306	0	2	-9
968	CHEMBL435534	c1ccccc1Cn(c2cccc3)c(c4c23)CCCC4CN(C)C	136	6.866	4.67	3	0	1	0	0	0	-1.715	0	2	-9.6
969	CHEMBL4434735	c1cccc(c12)S(=O)(=O)N(C2=O)CCCCCCN3CCN(CC3)c(ccc4)c(c45)nccc5	1716	5.765	3.76	9	-0.459	1	0	1	0	-1.43	0	4	-11
970	CHEMBL4435528	COc(c1)ccc(c12)[nH]cc2CCNCc3ccc(o3)-c4cc(O)ccc4	55	7.26	4.47	7	0	1	0	0	0	-1.586	1	0	-9.1
971	CHEMBL4435529	COc1cccc(c12)[nH]cc2CCNCc3ccc(o3)-c4ccccc4	109	6.963	4.77	4	0	1	0	0	0	-1.68	1	0	-9.7
972	CHEMBL4438349	Cn1cncc1-c2c[nH]c(c23)ccc(Cl)c3F	550	6.26	3.36	1	0	0	0	0	1	-1.294	0	2	-7.4
973	CHEMBL4438777	COc1cccc(c12)[nH]cc2CCNCc3ccc(o3)-c4ccc(F)cc4	132	6.879	4.91	6	0	1	0	0	0	-1.527	1	0	-9.9
974	CHEMBL4440130	C1CNCC=C1c2cn(c(c23)ccc(c3)OC)S(=O)(=O)c4cccc(c45)nccc5	4	8.398	3.81	2	-1.609	1	1	0	0	-1.925	1	2	-10.2
975	CHEMBL4440402	CCC(=O)Nc(n1)[nH]c(c1C)-c2cn(c(c23)ccc(c3)OC)S(=O)(=O)c4ccccc4	14	7.854	3.93	3	-1.677	0	0	0	0	-1.933	1	2	-11
976	CHEMBL4440598	C1CNCC=C1c2cn(c(c23)ccc(Cl)c3)S(=O)(=O)c4cncc(c45)cccc5	18	7.745	4.46	2	-1.388	1	1	0	0	-1.97	0	2	-10.2
977	CHEMBL4440695	c1cccc(c12)S(=O)(=O)N(C2=O)CCCCCCN3CCN(CC3)c4nsc(c45)cccc5	58	7.237	3.82	9	-1.241	1	0	1	0	-1.407	0	4	-10.3
978	CHEMBL4441060	Nc([nH]1)ncc1-c2cn(c(c23)cccc3)S(=O)(=O)c4ccccc4	10	8	2.85	1	-1.612	0	0	0	1	-2.086	0	2	-9.9
979	CHEMBL4441691	c1cccc(c12)[nH]cc2CC(C)NCc3ccc(o3)-c4ccc(O)cc4	475	6.323	4.85	6	0	1	0	0	0	-1.707	0	0	-9.1
980	CHEMBL4442332	COc(c1)ccc(c12)n(cc2-c(c3C)[nH]c(n3)N)S(=O)(=O)c4cccc(c45)cccc5	10	8	4.32	2	-1.814	0	0	0	0	-2.213	1	2	-10.6
981	CHEMBL4442337	CCn1cncc1-c2c[nH]c(c23)cccc3F	6457	5.19	3.19	3	0	0	0	0	1	-1.265	0	2	-7.6
982	CHEMBL4442385	n1ccccc1N(CC2)CCN2CCCCCCN(C3=O)c4cccc5cccc3c45	1461	5.835	4.58	9	0	1	0	1	0	-1.206	0	4	-10
983	CHEMBL4442456	C1CNCC=C1c2cn(c(c23)cccc3)S(=O)(=O)c(c4)ccc(c45)nccc5	20	7.699	3.8	2	-1.382	1	1	0	0	-2.018	0	2	-11
984	CHEMBL4444655	C1CNCC=C1c2c(C)n(c(c23)cccc3)S(=O)(=O)c(c4)ncc(c45)cccc5	20	7.699	4.11	1	-1.323	1	1	0	0	-2.097	0	2	-10.7
985	CHEMBL4446018	C1CNCCC1c2cn(c(c23)ccc(c3)OC)S(=O)(=O)c4cncc(c45)cccc5	24	7.62	3.9	2	-1.502	1	1	0	0	-1.905	1	2	-10.1
986	CHEMBL4446215	CC(=O)Nc(n1)[nH]c(c1C)-c2cn(c(c23)cccc3)S(=O)(=O)c4ccccc4	25	7.602	3.54	2	-1.6	0	0	0	0	-2.068	0	2	-11.1
987	CHEMBL4447200	C1CNCC=C1c2c(C)n(c(c23)cccc3)S(=O)(=O)c(cc4)cc(c45)nccc5	18	7.745	4.11	2	-1.323	1	1	0	0	-2.092	0	2	-10.4
988	CHEMBL4447330	COc(cc1)ccc1N(CC2)CCN2CCCCCCN(C3=O)C(=O)c4cccc5cccc3c45	5765	5.239	4.83	9	0	1	0	1	0	-0.832	1	3	-11
989	CHEMBL4449148	c1cccc(c1[N+]([O-])=O)N(CC2)CCN2CCCCCCN3S(=O)(=O)c4cccc5cccc3c45	494	6.306	4.64	9	-1.02	1	1	1	0	-1.981	0	4	-10.2
990	CHEMBL445	CNCCC=C1c(cccc2)c2CCc(c13)cccc3	214	6.67	3.83	4	0	1	0	0	0	-1.108	0	0	-8.7
991	CHEMBL4450907	c1ccccc1S(=O)(=O)n(cc2)c(c23)cccc3-c4cnc(N)[nH]4	34	7.469	2.85	2	-1.374	0	0	0	1	-2.147	0	2	-9.8
992	CHEMBL4451494	COc(c1)ccc(c12)occ2CCNCc3ccc(o3)-c4ccc(O)cc4	1696	5.771	4.74	7	0	1	0	0	0	-1.232	1	0	-8.6
993	CHEMBL4451666	CC(=O)Nc([nH]1)ncc1-c2cn(S(=O)(=O)c(cc3F)ccc3)c(c24)ccc(c4)OC	50	7.301	3.37	1	-1.557	0	0	0	1	-1.796	1	2	-11
994	CHEMBL4451939	COc(c1)ccc(c12)n(cc2-c(c3C)[nH]c(n3)N)S(=O)(=O)c(c4)ccc(c45)cccc5	9	8.046	4.32	1	-1.641	0	0	0	0	-2.214	1	2	-10.7
995	CHEMBL4452121	CCn1cncc1-c2c[nH]c(c23)ccc(Cl)c3	4169	5.38	3.7	2	0	0	0	0	1	-1.421	0	2	-7.4
996	CHEMBL4452416	C1CNCC=C1c2cn(c(c23)ccc(Cl)c3)S(=O)(=O)c4cccc(c45)nccc5	11	7.959	4.46	2	-1.503	1	1	0	0	-2.033	0	2	-10.4
997	CHEMBL4452569	CCn1cncc1-c2c[nH]c(c23)ccc(I)c3F	2884	5.54	3.8	0	0	0	0	0	1	-1.263	0	2	-7.7
998	CHEMBL4453250	CC(=O)Nc(n1)[nH]c(c1C)-c2cn(c(c23)ccc(c3)OC)S(=O)(=O)c(c4)ccc(c45)cccc5	23	7.638	4.7	2	-1.627	0	0	0	0	-2.126	1	2	-11.6
999	CHEMBL4453733	FC(F)CNc(n1)[nH]c(c1C)-c2cn(c(c23)ccc(c3)OC)S(=O)(=O)c4ccccc4	21	7.678	4.26	3	-1.704	1	0	0	0	-1.949	1	2	-10.4
1000	CHEMBL4454105	c1cccc(c12)S(=O)(=O)N(C2=O)CCCCCCN3CCN(CC3)c4cccc(c45)cccc5	157	6.804	4.37	8	-0.459	1	0	1	0	-1.585	0	3	-10.9
1001	CHEMBL4454873	c1cccc(c12)[nH]cc2CCNCc3ccc(o3)-c(c4)ccc(c45)OCO5	220	6.658	4.49	4	0	1	0	0	0	-1.354	2	0	-9.9
1002	CHEMBL4456046	c1cccc(c12)S(=O)(=O)N(C2=O)CCCCCCN3CCN(CC3)c4cc(OC)ccc4	921	6.036	3.22	8	-0.459	1	0	1	0	-1.261	1	3	-10
1003	CHEMBL4456224	C1CNCC=C1c2cn(c(c23)ccc(c3)OC)S(=O)(=O)c(c4)ncc(c45)cccc5	6	8.222	3.81	2	-1.431	1	1	0	0	-1.945	1	2	-10.4
1004	CHEMBL445652	c1cccc(c12)n(CCN(C)C)c(C)c2S(=O)(=O)c3ccccc3	18	7.745	3.34	2	-2.006	1	1	0	0	-2.102	0	2	-8.7
1005	CHEMBL4457045	c1c(F)ccc(c12)occ2CCNCc3ccc(o3)-c4ccc(O)cc4	522	6.282	4.87	6	0	1	0	0	0	-1.198	0	0	-9.1
1006	CHEMBL4457109	c1cccc(c12)S(=O)(=O)N(C2=O)CCCCCCN3CCN(CC3)c4c(Cl)cccc4	459	6.338	3.87	8	-0.459	1	0	1	0	-1.367	0	3	-10.1
1007	CHEMBL4458840	COc(c1)ccc(c12)[nH]cc2CCN(C)Cc3ccc(o3)-c4ccc(O)cc4	199	6.701	4.82	9	0	1	0	0	0	-1.597	1	1	-9.5
1008	CHEMBL4459863	C1CNCC=C1c2cn(c(c23)cc(Cl)cc3)S(=O)(=O)c(c4)cnc(c45)cccc5	37	7.432	4.46	1	-1.322	1	1	0	0	-2.095	0	2	-11
1009	CHEMBL4461327	CC(=O)Nc(n1)[nH]c(c1C)-c2cn(c(c23)ccc(c3)OC)S(=O)(=O)c4ccccc4	10	8	3.54	3	-1.695	0	0	0	0	-1.921	1	2	-11.2
1010	CHEMBL446194	c1cccc(c12)n(cc2CCN)S(=O)(=O)c(c3)sc(Cl)c3Cl	31	7.509	3.75	2	-1.919	1	1	0	0	-2.044	0	1	-8.7
1011	CHEMBL4462814	c1cccc(c12)[nH]cc2CCNCc3ccc(o3)-c4ccccc4	91	7.041	4.76	6	0	1	0	0	0	-1.815	0	0	-9.2
1012	CHEMBL4462820	CCn1cncc1-c2c[nH]c(c23)ccc(Br)c3F	2951	5.53	3.95	1	0	0	0	0	1	-1.291	0	2	-7.5
1013	CHEMBL4462839	c1cccc(c1C(F)(F)F)N(CC2)CCN2CCCCCCN(C3=O)S(=O)(=O)c(c34)cccc4	1272	5.896	4.23	8	-0.459	1	0	1	0	-1.276	0	3	-9.6
1014	CHEMBL4463737	FC(F)Cn(c(n1)N)c(c1C)-c2cn(c(c23)ccc(c3)OC)S(=O)(=O)c4ccccc4	157	6.804	3.91	2	-1.685	0	0	0	0	-1.906	1	3	-9.9
1015	CHEMBL4464285	c1cccc(c12)n(C)cc2CCNCc3ccc(o3)-c4ccccc4	303	6.519	4.77	7	0	1	0	0	0	-1.786	0	1	-9.4
1016	CHEMBL4464377	CCn1cncc1-c2c[nH]c(c23)cccc3	3020	5.52	3.05	3	0	0	0	0	1	-1.454	0	2	-7.3
1017	CHEMBL4464512	c1cccc(c12)S(=O)(=O)N(C2=O)CCCCCCN3CCN(CC3)c4cc(Cl)ccc4	372	6.429	3.87	8	-0.458	1	0	1	0	-1.359	0	3	-9.7
1018	CHEMBL4464881	COc(c1)ccc(c12)[nH]cc2CCNCc3ccc(o3)-c4cc(OC)ccc4	76	7.119	4.78	6	0	1	0	0	0	-1.585	2	0	-8.6
1019	CHEMBL4465181	c1cccc(c12)S(=O)(=O)N(C2=O)CCCCCCN3CCN(CC3)c(c4)ccc(Cl)c4Cl	132	6.879	4.52	9	-0.458	1	0	1	0	-1.386	0	3	-10
1020	CHEMBL4465638	CCC(=O)Nc(n1)[nH]c(c1C)-c2cn(S(=O)(=O)c(cc3F)ccc3)c(c24)ccc(c4)OC	9	8.046	4.07	2	-1.546	0	0	0	0	-1.811	1	2	-11.2
1021	CHEMBL4465929	c1ccccc1OCc2nc(N)nc(n2)N(CC3)CCN3C	507	6.295	0.78	2	0	1	0	0	0	-0.647	1	5	-8
1022	CHEMBL4466071	CCC(=O)Nc(n1)[nH]c(c1CC)-c2cn(c(c23)ccc(c3)OC)S(=O)(=O)c4ccccc4	16	7.796	4.19	3	-1.692	0	0	0	0	-1.916	1	2	-11.2
1023	CHEMBL4467357	COc(c1)ccc(c12)[nH]cc2CC(C)NCc3ccc(o3)-c4ccc(O)cc4	345	6.462	4.86	7	0	1	0	0	0	-1.586	1	0	-9.1
1024	CHEMBL4467359	CC(=O)Nc([nH]1)ncc1-c2cn(c(c23)cccc3)S(=O)(=O)c4ccccc4	79	7.102	3.23	1	-1.604	0	0	0	1	-2.04	0	2	-10.7
1025	CHEMBL4468014	COc(c1)ccc(c12)n(cc2-c(c3C)nc(s3)N)S(=O)(=O)c4ccccc4	105	6.979	3.9	1	-1.97	0	0	0	0	-1.907	1	2	-10.1
1026	CHEMBL4468235	c1cccc(c12)n(C)cc2CCNCc3ccc(o3)-c4cc(OC)ccc4	556	6.255	4.78	5	0	1	0	0	0	-1.679	1	1	-9.1
1027	CHEMBL4468396	Nc(s1)nc(c1C)-c2cn(c(c23)cccc3)S(=O)(=O)c4ccccc4	100	7	3.89	2	-1.89	0	0	0	0	-2.021	0	2	-9.9
1028	CHEMBL4469147	CC(=O)Nc(n1)[nH]c(c1C)-c(cc2)cc(c23)n(cc3)S(=O)(=O)c4ccccc4	15	7.824	3.54	3	-1.389	0	0	0	0	-2.025	0	2	-10.9
1029	CHEMBL4469325	CCCN(CC1)CC=C1c2cn(c(c23)ccc(c3)OC)S(=O)(=O)c(cc4)cc(c45)nccc5	247	6.607	4.93	2	-1.423	1	1	1	0	-1.918	1	3	-10.8
1030	CHEMBL4469539	c1cccc(c1[N+]([O-])=O)N(CC2)CCN2CCCCCCN(C3=O)C(=O)c4cccc5cccc3c45	1410	5.851	4.73	8	0	1	1	1	0	-1.007	0	4	-10.8
1031	CHEMBL4469792	CC(=O)Nc(n1)[nH]c(c1C)-c2cn(c(c23)ccc(c3)OC)S(=O)(=O)c4cccc(c45)cccc5	10	8	4.7	1	-1.797	0	0	0	0	-2.105	1	2	-11.5
1032	CHEMBL4469860	CCc1c([nH]c(n1)N)-c2cn(c(c23)cccc3)S(=O)(=O)c4ccccc4	29	7.538	3.41	3	-1.619	0	0	0	0	-2.101	0	2	-10.3
1033	CHEMBL4469870	C1CNCCC1c2cn(c(c23)ccc(c3)OC)S(=O)(=O)c(cc4)cc(c45)nccc5	30	7.523	3.9	1	-1.437	1	1	0	0	-1.982	1	2	-10.2
1034	CHEMBL4470304	n1cccnc1N(CC2)CCN2CCCCCCN(C3=O)c4cccc5cccc3c45	5253	5.28	3.97	9	0	1	0	1	0	-0.97	0	5	-9.9
1035	CHEMBL4470487	c1cccc(c12)S(=O)(=O)N(C2=O)CCCCCCN3CCN(CC3)c4ncccn4	104	6.983	2	8	-0.459	1	0	1	0	-1.003	0	5	-9.6
1036	CHEMBL4470718	C1CNCC=C1c2cn(c(c23)cccc3)S(=O)(=O)c4cncc(c45)cccc5	5	8.301	3.8	2	-1.403	1	1	0	0	-1.975	0	2	-10.4
1037	CHEMBL4471055	Nc(n1)[nH]c(c1C)-c2cn(c(c23)cccc3)S(=O)(=O)c4cccc(c45)cccc5	8	8.097	4.31	3	-1.729	0	0	0	0	-2.28	0	2	-10.7
1038	CHEMBL4472629	Nc(n1)[nH]c(c1C)-c(cc2)cc(c23)n(cc3)S(=O)(=O)c4ccccc4	4	8.398	3.16	2	-1.39	0	0	0	0	-2.083	0	2	-10.4
1039	CHEMBL4473026	c1cccc(c12)S(=O)(=O)N(C2=O)CCCCCCN3CCN(CC3)c4c(F)cccc4	1619	5.791	3.35	8	-0.459	1	0	1	0	-1.193	0	3	-9.9
1040	CHEMBL4473083	c1cc(Cl)cc(Cl)c1OCc2nc(N)nc(n2)N(CC3)CCN3C	128	6.893	2.09	2	0	1	0	0	0	-0.658	1	5	-8.8
1041	CHEMBL4476372	CCn1cncc1-c2c[nH]c(c23)ccc(Cl)c3F	1622	5.79	3.84	1	0	0	0	0	1	-1.281	0	2	-7.7
1042	CHEMBL4476520	FC(F)(F)Oc(c1)ccc(c12)[nH]cc2-c3cncn3CC	3467	5.46	3.95	1	0	0	0	0	1	-1.256	1	2	-8.3
1043	CHEMBL4483304	CCC(=O)Nc(n1)[nH]c(c1C)-c(cc2)cc(c23)n(cc3)S(=O)(=O)c4ccccc4	17	7.77	3.93	3	-1.396	0	0	0	0	-2.063	0	2	-11.1
1044	CHEMBL4514440	c1ccccc1S(=O)(=O)N(CC2)c(c23)ccc(c3)N4CCNCC4	20	7.699	1.85	3	-1.378	1	0	0	0	-1.784	0	2	-9.7
1045	CHEMBL4515075	c1cccc(Cl)c1SC(C)c2nc(N)nc(n2)N(CC3)CCN3C	19	7.721	2.71	2	-0.43	1	0	0	0	-0.759	0	5	-8.4
1046	CHEMBL4516621	Cn1cncc1-c2c[nH]c(c23)ccc(F)c3F	603	6.22	2.85	1	0	0	0	0	1	-1.134	0	2	-7.6
1047	CHEMBL4516784	CCc1c([nH]c(n1)N)-c2cn(c(c23)ccc(c3)OC)S(=O)(=O)c4ccccc4	19	7.721	3.42	1	-1.706	0	0	0	0	-2.007	1	2	-10.1
1048	CHEMBL4519266	COc(c1)ccc(c12)[nH]cc2CCNCc3ccc(o3)-c4ccc(cc4)OC	90	7.046	4.78	6	0	1	0	0	0	-1.58	2	0	-8.6
1049	CHEMBL4520580	C1CCC1N2CCN(CC2)c3cccc(c34)CN(C4)S(=O)(=O)c5ccccc5	4.8	8.319	3.07	4	-1.102	2	1	0	0	-2.03	0	3	-10.4
1050	CHEMBL4521199	CC(=O)Nc(n1)[nH]c(c1C)-c2cn(S(=O)(=O)c(cc3F)ccc3)c(c24)ccc(c4)OC	14	7.854	3.68	1	-1.538	0	0	0	0	-1.751	1	2	-11
1051	CHEMBL4524981	c1ccc(Cl)cc1OCc2nc(N)nc(n2)N(CC3)CCN3C	148	6.83	1.44	2	0	1	0	0	0	-0.649	1	5	-8.3
1052	CHEMBL4526012	Cn1cncc1-c2c[nH]c(c23)ccc(Br)c3	245	6.611	3.33	2	0	0	0	0	1	-1.385	0	2	-7.3
1053	CHEMBL4527124	Cc1c(Cl)ccc(c1)OCc2nc(N)nc(n2)N(CC3)CCN3C	355	6.45	1.75	2	0	1	0	0	0	-0.614	1	5	-8.6
1054	CHEMBL4530023	c1ccccc1S(=O)(=O)N(CC2)c(c23)cccc3C4CCNCC4	13	7.886	2.91	1	-1.25	1	0	0	0	-1.778	0	1	-10.1
1055	CHEMBL4530770	c1cccc(F)c1N(CC2)CCN2CCCCCCN3S(=O)(=O)c4cccc5cccc3c45	710	6.149	4.87	10	-1.023	1	0	1	0	-1.772	0	3	-10.3
1056	CHEMBL4532712	Cc1cc(ccc1)OCc2nc(N)nc(n2)N(CC3)CCN3C	207	6.684	1.09	2	0	1	0	0	0	-0.62	1	5	-8.3
1057	CHEMBL4532741	c1ccc(OC)cc1N(CC2)CCN2CCCCCCN(C3=O)C(=O)c4cccc5cccc3c45	347	6.46	4.83	10	0	1	0	1	0	-0.849	1	3	-10.9
1058	CHEMBL4534733	CN1CCN(CC1)c2cccc(c23)N(CC3)S(=O)(=O)c4ccccc4	8.2	8.086	2.19	4	-1.305	1	0	0	0	-1.72	0	3	-10
1059	CHEMBL4535764	c1cccc(c12)[nH]cc2CCNCc3ccc(o3)-c4ccc([N+]([O-])=O)cc4	774	6.111	4.67	4	0	1	0	0	0	-1.918	0	1	-9.1
1060	CHEMBL4536834	CCCN(CC1)CCC1c(cc2)cc(c23)N(CC3)S(=O)(=O)c4ccccc4	71	7.149	4.03	4	-1.308	1	0	1	0	-1.829	0	2	-10.2
1061	CHEMBL4537701	CCC(=O)Nc(n1)[nH]c(c1C)-c2cn(c(c23)ccc(F)c3)S(=O)(=O)c4ccccc4	107	6.971	4.06	2	-1.626	0	0	0	0	-1.908	0	2	-11.2
1062	CHEMBL4538667	c1cccc(OC)c1N(CC2)CCN2CCCCCCn3c(=O)n4CCCc5cccc3c45	3270	5.485	4.14	8	0	1	0	1	0	-1.275	1	4	-10.1
1063	CHEMBL4540404	c1cccc(c12)S(=O)(=O)N(C2=O)CCCCCCN3CCN(CC3)c4ccccc4	971	6.013	3.21	8	-0.459	1	0	1	0	-1.357	0	3	-9.9
1064	CHEMBL4541473	CCCN(CC1)CCC1c2cccc(c23)CN(C3)S(=O)(=O)c4ccccc4	21	7.678	3.98	4	-1.077	2	1	1	0	-1.662	0	2	-9.8
1065	CHEMBL4541526	Cn1cncc1-c2c[nH]c(c23)ccc(I)c3	407	6.39	3.17	1	0	0	0	0	1	-1.398	0	2	-7.3
1066	CHEMBL4541828	C1CNCC=C1c2cn(c(c23)cccc3)S(=O)(=O)c(c4)ncc(c45)cccc5	12	7.921	3.8	1	-1.349	1	1	0	0	-2.06	0	2	-10.8
1067	CHEMBL4543169	C1CNCC=C1c2cn(c(c23)cc(Cl)cc3)S(=O)(=O)c(cc4)cc(c45)nccc5	22	7.658	4.46	1	-1.335	1	1	0	0	-2.039	0	2	-10.9
1068	CHEMBL4544099	CCN(CC1)CCC1c(cc2)cc(c23)N(CC3)S(=O)(=O)c4ccccc4	23	7.638	3.64	2	-1.261	1	0	1	0	-1.765	0	2	-10.4
1069	CHEMBL4548041	c1cccc(Cl)c1OCc2nc(N)nc(n2)N(CC3)CCN3C	129	6.889	1.44	2	0	1	0	0	0	-0.643	1	5	-8.6
1070	CHEMBL4549734	CCN1CCN(CC1)c2cccc(c23)CN(C3)S(=O)(=O)c4ccccc4	28	7.553	2.53	2	-1.096	2	1	1	0	-1.618	0	3	-9.7
1071	CHEMBL4550561	C1CCC1N(CC2)CCC2c3cccc(c34)CN(C4)S(=O)(=O)c5ccccc5	42	7.377	4.12	6	-1.149	2	1	0	0	-2.13	0	2	-10.5
1072	CHEMBL4550806	C1CN(C)CCC1c2cccc(c23)CN(C3)S(=O)(=O)c4ccccc4	9	8.046	3.2	4	-1.144	2	1	0	0	-1.734	0	2	-10
1073	CHEMBL4551197	C1CNCC=C1c2cn(c(c23)ccc(c3)OC)S(=O)(=O)c(c4)cnc(c45)cccc5	8	8.097	3.81	1	-1.393	1	1	0	0	-1.981	1	2	-10.8
1074	CHEMBL4551220	CCN1CCN(CC1)c(cc2)cc(c23)N(CC3)S(=O)(=O)c4ccccc4	60	7.222	2.58	4	-1.28	1	0	1	0	-1.799	0	3	-9.6
1075	CHEMBL4551858	C1CNCCC1c(cc2)cc(c23)N(CC3)S(=O)(=O)c4ccccc4	2.7	8.569	2.91	2	-1.317	1	0	0	0	-1.852	0	1	-10.3
1076	CHEMBL4552168	Nc(n1)[nH]c(c1C)-c2cn(S(=O)(=O)c(cc3F)ccc3)c(c24)ccc(c4)OC	9	8.046	3.31	1	-1.555	0	0	0	0	-1.811	1	2	-10.2
1077	CHEMBL4555115	CCn1cncc1-c2c[nH]c(c23)ccc(F)c3F	794	6.1	3.33	2	0	0	0	0	1	-1.119	0	2	-7.9
1078	CHEMBL4555349	CCn1cncc1-c2c[nH]c(c23)c(F)cc(I)c3	2455	5.61	3.8	2	0	0	0	0	1	-1.316	0	2	-7.6
1079	CHEMBL4557068	n1ccc[n+](c12)cc([nH]2)-c3cn(c(c34)cccc4)S(=O)(=O)c5ccccc5	50	7.301	3.01	1	-1.41	0	0	0	0	-2.373	0	3	-10.6
1080	CHEMBL4557247	c1ccccc1SCc2nc(N)nc(n2)N(CC3)CCN3C	26	7.585	1.5	3	-0.401	1	0	0	0	-0.729	0	5	-8.1
1081	CHEMBL4558202	Cn1cncc1-c2c[nH]c(c23)ccc(c3F)OC	3802	5.42	2.72	1	0	0	0	0	1	-1.149	1	2	-7.4
1082	CHEMBL4558397	c1cccc(c12)[nH]cc2CCNCc3ccc(o3)-c4ccco4	419	6.378	4.35	7	0	1	0	0	0	-1.667	0	0	-8.5
1083	CHEMBL4558433	C1CNCC=C1c2cn(c(c23)cccc3)S(=O)(=O)c(cc4)cc(c45)nccc5	7	8.155	3.8	1	-1.338	1	1	0	0	-2.043	0	2	-10.8
1084	CHEMBL4558840	C1CN(C)CC=C1c2cn(c(c23)ccc(c3)OC)S(=O)(=O)c(cc4)cc(c45)nccc5	82	7.086	4.15	1	-1.421	1	1	0	0	-1.91	1	3	-10.6
1085	CHEMBL4559172	C1CNCC=C1c2cn(c(c23)ccc(Cl)c3)S(=O)(=O)c(c4)cnc(c45)cccc5	11	7.959	4.46	1	-1.296	1	1	0	0	-2.085	0	2	-10.7
1086	CHEMBL4559312	CCn1cncc1-c2c[nH]c(c23)ccc(Br)c3	1349	5.87	3.81	1	0	0	0	0	1	-1.375	0	2	-7.3
1087	CHEMBL4559790	c1ccnc(c12)[nH]cc2CCNCc3ccc(o3)-c4ccc(O)cc4	531	6.275	3.86	6	0	1	0	0	0	-1.636	0	1	-9
1088	CHEMBL4562787	CCN1CCN(CC1)c(c2)ccc(c23)N(CC3)S(=O)(=O)c4ccccc4	129	6.889	2.58	3	-1.391	1	0	1	0	-1.772	0	3	-10
1089	CHEMBL4564093	n1ccccc1N(CC2)CCN2CCCCCCN(C3=O)C(=O)c4cccc5cccc3c45	1966	5.706	4.21	8	0	1	0	1	0	-0.827	0	4	-10.8
1090	CHEMBL4565216	C1CNCC=C1c2cn(c(c23)ccc(c3)OC)S(=O)(=O)c(c4)ccc(c45)nccc5	14	7.854	3.81	1	-1.461	1	1	0	0	-1.909	1	2	-10.8
1091	CHEMBL4565614	c1cccc(c12)[nH]cc2CCNCc3ccc([nH]3)-c4ccccc4	264	6.578	4.5	6	0	1	0	0	0	-2.272	0	0	-8.9
1092	CHEMBL4565881	CCn1cncc1-c2c[nH]c(c23)ccc(F)c3	4898	5.31	3.19	3	0	0	0	0	1	-1.313	0	2	-7.6
1093	CHEMBL4566557	CC(=O)Nc(n1)[nH]c(c1C)-c2cn(c(c23)cccc3)S(=O)(=O)c4cccc(c45)cccc5	13	7.886	4.69	3	-1.71	0	0	0	0	-2.261	0	2	-11.7
1094	CHEMBL4566992	CCN1CCN(CC1)c2cccc(c23)N(CC3)S(=O)(=O)c4ccccc4	31	7.509	2.58	2	-1.298	1	0	1	0	-1.749	0	3	-9.9
1095	CHEMBL45695	c1ccccc1S(=O)(=O)n(cc2)c(c23)cc(cc3)N(C4)CCN(C45)CCCC5	5.7	8.244	3.55	3	-1.448	1	0	0	0	-2.291	0	3	-10.8
1096	CHEMBL4569676	C1CNCCN1c(cc2)cc(c23)N(CC3)S(=O)(=O)c4ccccc4	12	7.921	1.85	2	-1.292	1	0	0	0	-1.814	0	2	-9.3
1097	CHEMBL4569757	c1cccc(c12)S(=O)(=O)N(C2=O)CCCCCCN3CCN(CC3)c(c4Cl)cccc4Cl	920	6.036	4.52	8	-0.46	1	0	1	0	-1.393	0	3	-10.1
1098	CHEMBL4570584	c1cccc(c1C)OCc2nc(N)nc(n2)N(CC3)CCN3C	87	7.06	1.09	2	0	1	0	0	0	-0.605	1	5	-8.8
1099	CHEMBL4571045	C1CNCC=C1c2cn(c(c23)cccc3)S(=O)(=O)c(c4)cnc(c45)cccc5	13	7.886	3.8	2	-1.304	1	1	0	0	-2.015	0	2	-10.9
1100	CHEMBL4571059	C1CN(C)CCC1c2cccc(c23)N(CC3)S(=O)(=O)c4ccccc4	45	7.347	3.25	4	-1.299	1	0	0	0	-1.812	0	2	-10.3
1101	CHEMBL4571077	n1ccccc1N(CC2)CCN2CCCCCCN3S(=O)(=O)c4cccc5cccc3c45	182	6.74	4.13	8	-1.03	1	0	1	0	-1.803	0	4	-10.2
1102	CHEMBL4571469	CC(=O)Nc(n1)[nH]c(c1CC)-c2cn(c(c23)ccc(c3)OC)S(=O)(=O)c4ccccc4	31	7.509	3.8	3	-1.681	0	0	0	0	-1.933	1	2	-10.6
1103	CHEMBL4572158	C1CNCC=C1c2cn(c(c23)ccc(Cl)c3)S(=O)(=O)c(cc4)cc(c45)nccc5	9	8.046	4.46	1	-1.319	1	1	0	0	-2.037	0	2	-10.8
1104	CHEMBL4572260	CN1CCN(CC1)c2cccc(c23)CN(C3)S(=O)(=O)c4ccccc4	2.6	8.585	2.14	3	-1.089	2	1	0	0	-1.603	0	3	-9.7
1105	CHEMBL4573880	CC(=O)Nc(n1)[nH]c(c1C)-c2c(C)n(c(c23)cccc3)S(=O)(=O)c4ccccc4	83	7.081	3.84	3	-1.591	0	0	0	0	-1.993	0	2	-11.4
1106	CHEMBL4573883	CCn1cncc1-c2c[nH]c(c23)cc(F)cc3	5888	5.23	3.19	3	0	0	0	0	1	-1.321	0	2	-7.6
1107	CHEMBL457570	CN(C)CCC1=C(C)Cc(c12)ccc(c2)NS(=O)(=O)c(c3)ccc(c34)cccc4	51	7.292	4.92	4	-1.127	1	0	0	0	-1.722	0	1	-10.4
1108	CHEMBL4578632	C1CN(C)CCC1c(cc2)cc(c23)N(CC3)S(=O)(=O)c4ccccc4	25	7.602	3.25	2	-1.317	1	0	0	0	-1.829	0	2	-10.6
1109	CHEMBL4579883	CCCN1CCN(CC1)c2cccc(c23)N(CC3)S(=O)(=O)c4ccccc4	74	7.131	2.97	4	-1.254	1	0	1	0	-1.714	0	3	-9.9
1110	CHEMBL4583507	CCn1cncc1-c2c[nH]c(c23)ccc(c3F)OC	3467	5.46	3.2	1	0	0	0	0	1	-1.137	1	2	-7.6
1111	CHEMBL4584325	Cc1ccc(cc1)OCc2nc(N)nc(n2)N(CC3)CCN3C	235	6.629	1.09	2	0	1	0	0	0	-0.619	1	5	-8.4
1112	CHEMBL4584719	c1cccc(OC)c1N(CC2)CCN2CCCCCCN(C3=O)C(=O)c4cccc5cccc3c45	671	6.173	4.83	9	0	1	0	1	0	-0.806	1	3	-11
1113	CHEMBL4585956	Cn1cncc1-c2c[nH]c(c23)ccc(Br)c3F	794	6.1	3.47	1	0	0	0	0	1	-1.251	0	2	-7.5
1114	CHEMBL4586276	CN1CCN(CC1)c(cc2)cc(c23)N(CC3)S(=O)(=O)c4ccccc4	25	7.602	2.19	3	-1.27	1	0	0	0	-1.788	0	3	-9.8
1115	CHEMBL4586353	Nc(n1)[nH]c(c1C)-c2cn(c(c23)cccc3)S(=O)(=O)c4ccccc4	14	7.854	3.16	1	-1.624	0	0	0	0	-2.068	0	2	-10.1
1116	CHEMBL4589391	CCN(CC1)CCC1c2cccc(c23)N(CC3)S(=O)(=O)c4ccccc4	170	6.77	3.64	4	-1.28	1	0	1	0	-1.788	0	2	-10.6
1117	CHEMBL4591250	CCCN1CCN(CC1)c(cc2)cc(c23)N(CC3)S(=O)(=O)c4ccccc4	125	6.903	2.97	4	-1.274	1	0	1	0	-1.796	0	3	-9.7
1118	CHEMBL4591410	COc(c1)ccc(c12)[nH]cc2CCNCc3ccc(o3)-c4cn[nH]c4	121	6.917	3.49	7	0	1	0	0	0	-1.631	1	1	-8.5
1119	CHEMBL4591630	COc1cccc(c12)[nH]cc2CCNCc3ccc(o3)-c4cc(OC)ccc4	247	6.607	4.78	4	0	1	0	0	0	-1.578	2	0	-9.8
1120	CHEMBL4591878	c1cccc(Cl)c1SCc2nc(N)nc(n2)N(CC3)CCN3C	126	6.9	2.15	3	-0.422	1	0	0	0	-0.749	0	5	-8.2
1121	CHEMBL4592085	CC(=O)Nc([nH]1)ncc1-c2cn(c(c23)ccc(c3)OC)S(=O)(=O)c4ccccc4	18	7.745	3.24	1	-1.689	0	0	0	1	-1.989	1	2	-10.8
1122	CHEMBL4592256	FC(F)(F)c(c1)ccc(c12)[nH]cc2-c3cncn3CC	1380	5.86	4.07	1	0	0	0	0	1	-1.381	0	2	-8.2
1123	CHEMBL4592941	c1cccc(c12)S(=O)(=O)N(C2=O)CCCCCCN3CCN(CC3)c4ccccn4	2352	5.629	2.61	8	-0.457	1	0	1	0	-1.239	0	4	-9.8
1124	CHEMBL459347	CC(C)c1ccc(cc1)S(=O)(=O)c2cccc(c23)oc(n3)N4CCNCC4	22	7.658	3.19	2	-1.415	1	0	0	0	-1.832	0	2	-10.1
1125	CHEMBL459348	FC(F)(F)c1cc(ccc1)S(=O)(=O)c2cccc(c23)oc(n3)N4CCNCC4	22	7.658	3.09	1	-1.41	1	0	0	0	-1.749	0	2	-10.4
1126	CHEMBL459349	C1CNCCN1c(n2)oc(c23)cccc3S(=O)(=O)c4ccccc4	41	7.387	2.07	2	-1.461	1	0	0	0	-1.8	0	2	-9.4
1127	CHEMBL459371	CCN1CCN(CC1)c(n2)oc(c23)cccc3S(=O)(=O)c4cccc(c45)cccc5	12	7.921	3.96	1	-1.564	1	0	1	0	-1.993	0	3	-10.4
1128	CHEMBL459372	CC(C)N1CCN(CC1)c(n2)oc(c23)cccc3S(=O)(=O)c4cccc(c45)cccc5	13	7.886	4.34	1	-1.568	1	0	0	0	-2.009	0	3	-10.7
1129	CHEMBL45977	C1CCCN(C12)CCN(C2)c(cc3)cc(c34)n(cc4)S(=O)(=O)c(c5)ccc(c56)cccc6	3	8.523	4.71	3	-1.393	1	0	0	0	-2.482	0	3	-11.5
1130	CHEMBL45987	C1CCN(C12)CCC(C2)(O)c(cc3)cc(c34)n(cc4)S(=O)(=O)c5cccc(c56)cccc6	4.7	8.328	4.48	4	-1.626	1	0	0	0	-2.289	0	2	-11.1
1131	CHEMBL459987	C1CNCCN1c(o2)nc(c23)cccc3S(=O)(=O)c4cccc(c45)cccc5	7.1	8.149	3.22	1	-1.607	1	0	0	0	-2.054	0	2	-10.2
1132	CHEMBL459988	CN1CCN(CC1)c(n2)oc(c23)cccc3S(=O)(=O)c4cccc(c45)cccc5	9.7	8.013	3.57	1	-1.549	1	0	0	0	-1.979	0	3	-10.4
1133	CHEMBL459989	COc1cc(ccc1)S(=O)(=O)c2cccc(c23)oc(n3)N4CCNCC4	25	7.602	2.08	2	-1.348	1	0	0	0	-1.69	1	2	-9.3
1134	CHEMBL460001	CCCCN1CCN(CC1)c(n2)oc(c23)cccc3S(=O)(=O)c4cccc(c45)cccc5	88	7.056	4.74	2	-1.564	1	0	1	0	-1.998	0	3	-10.2
1135	CHEMBL460194	C1CNCCN1c(n2)oc(c23)cccc3S(=O)(=O)c4c(Cl)ccc(Cl)c4	13	7.886	3.38	2	-1.484	1	0	0	0	-1.83	0	2	-9.6
1136	CHEMBL460195	C1CNCCN1c(n2)oc(c23)cccc3S(=O)(=O)c4cccc(c45)cccc5	3.1	8.509	3.22	0	-1.562	1	0	0	0	-2.012	0	2	-10.3
1137	CHEMBL462529	C1CNCCN1c(n2)oc(c23)cccc3S(=O)(=O)c4cc(Cl)ccc4	31	7.509	2.72	2	-1.46	1	0	0	0	-1.8	0	2	-9.7
1138	CHEMBL4632519	C1C[C@@H]2C[C@H]1[C@H]([C@H]23)C(=O)N(C3=O)CCCCCCN4CCN(CC4)c5ccc(Cl)cc5	3028	5.519	4.05	9	0	1	0	1	0	-1.04	0	3	-10.3
1139	CHEMBL4635229	NC(=O)Nc(c1)ccc(c1c23)CC4c2c(CCN4C)cc(OC)c3OC	415	6.382	2.95	3	0	1	0	0	0	-0.866	2	1	-9.7
1140	CHEMBL4635363	C1C[C@@H]2C[C@H]1[C@H]([C@H]23)C(=O)N(C3=O)CCCCCCN4CCN(CC4)c5cc(Cl)ccc5	1142	5.942	4.05	9	0	1	0	1	0	-1.043	0	3	-10.1
1141	CHEMBL4636165	C#CCOc1c(OC)cc(CCN2C)c3C2Cc(c4c13)ccc(c4)NC(=O)CCC	354	6.451	4.2	1	0	1	0	0	0	-0.884	2	1	-10.1
1142	CHEMBL4636435	FC(F)(F)c1cc(ccc1)N(CC2)CCN2CCCCCCN(C3=O)C(=O)[C@@H]([C@@H]34)[C@@H]5C[C@H]4CC5	2205	5.657	4.42	9	0	1	0	1	0	-0.99	0	3	-10.6
1143	CHEMBL4638308	c1cccc(c12)[nH]c(=O)n2CCCCCCN3CCN(CC3)c4nsc(c45)cccc5	189	6.724	4.32	8	-0.793	1	0	1	0	-1.369	0	4	-10
1144	CHEMBL4639203	C1C[C@@H]2C[C@H]1[C@H]([C@H]23)C(=O)N(C3=O)CCCCCCN4CCN(CC4)c(c5Cl)cccc5Cl	536	6.271	4.71	9	0	1	0	1	0	-1.076	0	3	-9.9
1145	CHEMBL4639400	C1CC1COc2c(OC)cc(CCN3C)c4C3Cc(c5c24)ccc(c5)N	132	6.879	3.82	2	0	1	0	0	0	-1.355	2	1	-8.7
1146	CHEMBL4640150	CCCC(=O)Nc(c1)ccc(c1c23)CC4c2c(CCN4C)cc(OC)c3OCC=C	198	6.703	4.75	1	0	1	0	0	0	-0.842	2	1	-9.6
1147	CHEMBL4640332	C#CCOc1c(OC)cc(CCN2C)c3C2Cc(c4c13)ccc(c4)NC(=O)N	410	6.387	2.95	2	0	1	0	0	0	-0.823	2	1	-10.2
1148	CHEMBL4640588	COc1c(OC)cc(CCN2C)c3C2Cc(c4c13)ccc(c4)NS(=O)(=O)C	86	7.066	2.83	2	-0.317	1	0	0	0	-0.762	2	1	-9.5
1149	CHEMBL464099	COc1c(OC)cc(CCN2C)c3[C@@H]2Cc(c4c13)cc(O)c(c4)OC	306	6.514	3.17	3	0	1	0	0	0	-0.649	3	1	-8.9
1150	CHEMBL4641296	c1ccccc1S(=O)(=O)NCCCCCCN2CCN(CC2)c3nsc(c34)cccc4	317	6.499	3.96	8	-1.633	2	1	1	0	-1.841	0	3	-9.6
1151	CHEMBL4641609	C1C[C@@H]2C[C@H]1[C@H]([C@H]23)C(=O)N(C3=O)CCCCCCN4CCN(CC4)c5nsc(c56)cccc6	486	6.313	4.01	9	-0.783	1	0	1	0	-1.089	0	4	-9.9
1152	CHEMBL4642034	CCCC(=O)Nc(c1)ccc(c1c23)CC4c2c(CCN4C)cc(OC)c3OCC5CC5	322	6.492	4.97	2	0	1	0	0	0	-1.304	2	1	-9.8
1153	CHEMBL4642981	c12c3cccc1CCCn2c(=O)n3CCCCCCN4CCN(CC4)c5nsc(c56)cccc6	379	6.421	4.74	9	-0.792	1	0	1	0	-1.475	0	5	-10.3
1154	CHEMBL4643450	c1cccc(c12)oc(=O)n2CCCCCCN3CCN(CC3)c4nsc(c45)cccc5	189	6.724	4.59	7	-0.784	1	0	1	0	-1.079	0	4	-10
1155	CHEMBL4644906	C1CC(=O)Nc(c12)ccc(c2)OCCCCCCN3CCN(CC3)c4nsc(c45)cccc5	805	6.094	4.94	8	-0.784	1	0	1	0	-1.332	1	3	-10.1
1156	CHEMBL4645292	C1C[C@@H]2C[C@H]1[C@H]([C@H]23)C(=O)N(C3=O)CCCCCCN4CCN(CC4)c5c(OC)cccc5	4874	5.312	3.41	7	0	1	0	1	0	-0.889	1	3	-9.5
1157	CHEMBL4645308	C1C[C@@H]2C[C@H]1[C@H]([C@H]23)C(=O)N(C3=O)CCCCCCN4CCN(CC4)c5c(Cl)cccc5	1641	5.785	4.05	8	0	1	0	1	0	-1.049	0	3	-10
1158	CHEMBL4645793	c1ccccc1C(=O)NCCCCCCN2CCN(CC2)c3nsc(c34)cccc4	221	6.656	4.41	8	-0.785	2	0	1	0	-1.506	0	3	-9.6
1159	CHEMBL4645997	CN(C)c(c1)ccc(c1c23)CC4c2c(CCN4C)cc(OC)c3OC	127	6.896	3.52	3	0	1	0	0	0	-0.87	2	2	-8.8
1160	CHEMBL4646172	C=CCOc1c(OC)cc(CCN2C)c3C2Cc(c4c13)ccc(c4)N(C)C	102	6.991	4.08	1	0	1	0	0	0	-0.854	2	2	-8.9
1161	CHEMBL4646861	C1CC1COc2c(OC)cc(CCN3C)c4C3Cc(c5c24)ccc(c5)N(C)C	329	6.483	4.3	2	0	1	0	0	0	-1.336	2	2	-8.6
1162	CHEMBL4648581	c1cccn(c12)c(=O)n(n2)CCCCCCN3CCN(CC3)c4nsc(c45)cccc5	252	6.599	3.49	8	-0.792	1	0	1	0	-1.231	0	6	-9.9
1163	CHEMBL4649697	CCCC(=O)Nc(c1)ccc(c1c23)CC4c2c(CCN4C)cc(OC)c3OC	356	6.449	4.19	1	0	1	0	0	0	-0.865	2	1	-9.5
1164	CHEMBL471099	C1CNCCc(c1c23)n(c2cccc3)S(=O)(=O)c4c(Cl)cccc4	19	7.721	3.22	3	-1.654	1	1	0	0	-1.859	0	1	-10.1
1165	CHEMBL471783	C1CNCCc(c1c23)n(c2cccc3)S(=O)(=O)c4cc(Cl)ccc4	41	7.387	3.22	2	-1.656	1	1	0	0	-1.861	0	1	-10.5
1166	CHEMBL476006	CN(C)CCC1=C(C)Cc(c12)ccc(c2)NS(=O)(=O)c(c(n3)Cl)n(c34)ccs4	4.5	8.347	4.13	3	-1.993	1	0	0	0	-2.31	0	3	-9.7
1167	CHEMBL47691	Cc1ccc(cc1)S(=O)(=O)n(cc2)c(c23)cc(cc3)N(C4)CCN(C45)CCC5	3.3	8.481	3.47	3	-1.439	1	0	0	0	-2.118	0	3	-11
1168	CHEMBL477650	CN(C)CCC1=C(C)Cc(c12)ccc(c2)NS(=O)(=O)c3csc(c34)cccc4	53	7.276	4.98	3	-1.593	1	0	0	0	-1.914	0	1	-9.6
1169	CHEMBL478894	C1CCCN1CCC2=C(C)Cc(c23)ccc(c3)NS(=O)(=O)c(c(n4)Cl)n(c45)ccs5	17	7.77	4.67	3	-1.986	1	0	1	0	-2.653	0	3	-10.3
1170	CHEMBL478895	C1CCCCN1CCC2=CCc(c23)ccc(c3)NS(=O)(=O)c(c(n4)Cl)n(c45)ccs5	31	7.509	4.67	3	-1.993	1	0	1	0	-2.779	0	3	-9.9
1171	CHEMBL479349	Cc1ccc(cc1)S(=O)(=O)n(c2cccc3)c(c4c23)CCNCC4	29	7.538	2.87	2	-1.619	1	1	0	0	-1.825	0	1	-10.5
1172	CHEMBL479362	COc1ccc(cc1)S(=O)(=O)n(c2cccc3)c(c4c23)CCNCC4	33	7.481	2.58	2	-1.538	1	1	0	0	-1.745	1	1	-9.6
1173	CHEMBL479374	CCN(CC1)CCc(c1c23)n(c2cccc3)S(=O)(=O)c(ccc4)cc4OC	50	7.301	3.31	2	-1.472	1	1	1	0	-1.677	1	2	-10.2
1174	CHEMBL479375	CCCN(CC1)CCc(c1c23)n(c2cccc3)S(=O)(=O)c(ccc4)cc4OC	124	6.907	3.7	3	-1.485	1	1	1	0	-1.693	1	2	-9.7
1175	CHEMBL479548	c1cccc(c1OC)S(=O)(=O)n(c2cccc3)c(c4c23)CCNCC4	19	7.721	2.58	2	-1.522	1	1	0	0	-1.731	1	1	-9.3
1176	CHEMBL480123	COc1cc(ccc1)S(=O)(=O)n(c2cccc3)c(c4c23)CCNCC4	12	7.921	2.58	3	-1.536	1	1	0	0	-1.741	1	1	-10.1
1177	CHEMBL481278	FC(F)(F)c1cc(ccc1)S(=O)(=O)n(c2cccc3)c(c4c23)CCNCC4	89	7.051	3.59	3	-1.582	1	1	0	0	-1.787	0	1	-11.2
1178	CHEMBL481472	FC(F)(F)c1ccc(cc1)S(=O)(=O)n(c2cccc3)c(c4c23)CCNCC4	46	7.337	3.59	3	-1.58	1	1	0	0	-1.79	0	1	-10.4
1179	CHEMBL482099	c1ccccc1CCN(CC2)CCc(c2c34)n(c3cccc4)S(=O)(=O)c(ccc5)cc5OC	504	6.298	4.53	5	-1.492	1	1	1	0	-2.28	1	2	-10.9
1180	CHEMBL482736	NCCC(=O)Nc(c1)ccc(c12)n(nc2)S(=O)(=O)c3cccc(c34)cccc4	50	7.301	2.71	1	-1.52	1	1	0	0	-1.704	0	2	-9.7
1181	CHEMBL482757	C1NCCC[C@H]1C(=O)Nc(cc2)cc(c23)n(nc3)S(=O)(=O)c4cccc(c45)cccc5	4	8.398	3.36	1	-1.326	1	1	0	0	-2.113	0	2	-10.9
1182	CHEMBL484333	C1CCCCN1CCC(=O)Nc(cc2)cc(c23)n(nc3)S(=O)(=O)c4cccc(c45)cccc5	15	7.824	4.24	2	-1.403	1	1	1	0	-2.129	0	3	-10.9
1183	CHEMBL484345	NCCC(=O)Nc1cccc(c12)n(nc2)S(=O)(=O)c3cccc(c34)cccc4	7.9	8.102	2.71	1	-1.421	1	1	0	0	-1.69	0	2	-10.1
1184	CHEMBL494675	c1ccccc1-c2c(cccc2)N3CCNCC3	596	6.225	2.76	4	0	1	0	0	0	-1.404	0	1	-7.9
1185	CHEMBL49598	c1c(F)ccc(c1F)S(=O)(=O)n(cc2)c(c23)cc(cc3)N(C4)CCN(C45)CCCC5	3.6	8.444	3.83	3	-1.172	1	0	0	0	-1.981	0	3	-11.3
1186	CHEMBL500305	C1CNCCc(c1c23)n(c2cccc3)S(=O)(=O)c(cc4F)ccc4	33	7.481	2.71	3	-1.5	1	1	0	0	-1.706	0	1	-10.4
1187	CHEMBL511489	C1CNCCc(c1c23)n(c2cccc3)S(=O)(=O)c4ccc(Cl)cc4	18	7.745	3.22	1	-1.64	1	1	0	0	-1.847	0	1	-10.3
1188	CHEMBL512332	C\N=C(\N1C)N(C)C(=O)/C1=C\c2c[nH]c(c23)cccc3	1716	5.765	1.9	2	0	0	0	0	1	-0.857	1	3	-8
1189	CHEMBL513051	C1CNCCc(c1c23)n(c2cccc3)S(=O)(=O)c(cc4)ccc4F	23	7.638	2.71	2	-1.502	1	1	0	0	-1.707	0	1	-10.3
1190	CHEMBL515307	CN(C)CCC1=CCc(c12)ccc(c2)NS(=O)(=O)c(c(n3)Cl)n(c34)ccs4	10	8	3.74	3	-2.018	1	0	0	0	-2.363	0	3	-9
1191	CHEMBL517707	CCCN1CCN(CC1)c(n2)oc(c23)cccc3S(=O)(=O)c4cccc(c45)cccc5	36	7.444	4.35	1	-1.568	1	0	1	0	-2	0	3	-10.2
1192	CHEMBL518017	FC(F)(F)c1ccc(cc1)S(=O)(=O)c2cccc(c23)oc(n3)N4CCNCC4	33	7.481	3.09	2	-1.412	1	0	0	0	-1.825	0	2	-10.3
1193	CHEMBL518153	C1CN(C)CCc(c1c23)n(c2cccc3)S(=O)(=O)c(ccc4)cc4OC	19	7.721	2.92	3	-1.507	1	1	0	0	-1.708	1	2	-10.1
1194	CHEMBL518762	CC(C)N(CC1)CCc(c1c23)n(c2cccc3)S(=O)(=O)c(ccc4)cc4OC	85	7.071	3.7	2	-1.483	1	1	0	0	-1.694	1	2	-9.9
1195	CHEMBL518781	C1CNCCN1c(n2)oc(c23)cccc3S(=O)(=O)c(cc4F)ccc4	54	7.268	2.21	1	-1.304	1	0	0	0	-1.64	0	2	-9.7
1196	CHEMBL519299	c1ccccc1CN(CC2)CCc(c2c34)n(c3cccc4)S(=O)(=O)c(ccc5)cc5OC	139	6.857	4.49	3	-1.471	1	1	1	0	-2.249	1	2	-10.9
1197	CHEMBL520777	Cc1cc(ccc1)S(=O)(=O)n(c2cccc3)c(c4c23)CCNCC4	68	7.167	2.87	2	-1.623	1	1	0	0	-1.828	0	1	-10.6
1198	CHEMBL521419	CCN(CC1)CCc(c1c23)n(c2cccc3)S(=O)(=O)c4ccccc4	12	7.921	3.3	2	-1.595	1	1	1	0	-1.798	0	2	-10.1
1199	CHEMBL521426	C1CNCCc(c1c23)n(c2cccc3)S(=O)(=O)c(cc4)cc(c45)cccc5Cl	24	7.62	4.37	1	-1.555	1	1	0	0	-2.063	0	1	-10.5
1200	CHEMBL53904	OCCN(CC1)CCN1CC/C=C\2c(cccc3)c3Sc(c24)ccc(Cl)c4	169	6.772	4.24	6	-1.145	2	0	2	0	-1.453	0	2	-8.9
1201	CHEMBL539327	CN1CCC[C@@H]1Cc2c[nH]c(c23)cccc3	640	6.194	2.8	6	0	1	0	0	0	-1.291	0	1	-7.3
1202	CHEMBL539587	c1cccc(c12)n(cc2)C[C@H]3CCCN3C	550	6.26	2.74	6	0	1	0	0	0	-1.341	0	2	-7.2
1203	CHEMBL539589	N1CCC[C@@H]1Cc2c[nH]c(c23)cccc3	60	7.222	2.46	6	0	1	0	0	0	-1.368	0	0	-7.2
1204	CHEMBL54	c1cc(F)ccc1C(=O)CCCN(CC2)CCC2(O)c3ccc(Cl)cc3	1083	5.965	4.43	9	0	1	1	1	0	-1.281	0	1	-9.4
1205	CHEMBL565724	c1ccnc(c12)n(CCN(C)C)cc2S(=O)(=O)c(c(n3)Cl)n(c34)ccs4	0.9	9.046	2.79	1	-2.777	1	1	0	0	-2.829	0	5	-8.2
1206	CHEMBL565730	c1ccnc(c12)n(CCN(C)C)c(C)c2S(=O)(=O)c3ccccc3	4.7	8.328	2.74	3	-1.955	1	1	0	0	-2.009	0	3	-8.5
1207	CHEMBL565731	c1cccc(c1C(F)(F)F)S(=O)(=O)c2cn(CCN)c(c23)nccc3	2.1	8.678	2.85	1	-1.932	1	1	0	0	-1.989	0	2	-8.5
1208	CHEMBL565746	c1ccnc(c12)n(CCNC)cc2S(=O)(=O)c(c(n3)Cl)n(c34)ccs4	0.9	9.046	2.45	1	-2.769	1	1	0	0	-2.82	0	4	-8
1209	CHEMBL565753	c1ccnc(c12)n(CCN(C)C)cc2S(=O)(=O)c3cccs3	15	7.824	2.49	1	-2.296	1	1	0	0	-2.35	0	3	-7.4
1210	CHEMBL565977	c1ccnc(c12)n(CCN(C)C)cc2S(=O)(=O)c3cc(Cl)cc(Cl)c3	4.3	8.367	3.74	1	-2.015	1	1	0	0	-2.068	0	3	-8.4
1211	CHEMBL566218	c1cccc(c12)cccc2Cc(n3)[nH]c(c34)cccc4N(CC5)CCN5C	31.61	7.5	4.06	3	0	1	0	0	0	-1.878	0	3	-9.8
1212	CHEMBL566219	c1cccc(c12)ccc(c2)Cc(n3)[nH]c(c34)cccc4N5CCNCC5	33	7.481	3.72	3	0	1	0	0	0	-1.893	0	2	-10.2
1213	CHEMBL566410	c1ccccc1Cc(n2)[nH]c(c23)cccc3N(CC4)CCN4C	41.4	7.383	2.91	2	0	1	0	0	0	-1.658	0	3	-8.7
1214	CHEMBL567805	C1CCCN1CCn(c(c23)nccc3)cc2S(=O)(=O)c(cc4F)ccc4	88	7.056	3.1	2	-1.854	1	1	1	0	-2.249	0	3	-9.4
1215	CHEMBL568249	c1ccnc(c12)n(CCN(C)C)cc2S(=O)(=O)c3c(Cl)cccc3Cl	9	8.046	3.74	1	-2.057	1	1	0	0	-2.109	0	3	-8.4
1216	CHEMBL568672	c1ccnc(c12)n(CCN)cc2S(=O)(=O)c(cc3F)ccc3	4.7	8.328	1.97	3	-1.838	1	1	0	0	-1.892	0	2	-8.4
1217	CHEMBL568673	c1ccnc(c12)n(CCN(C)C)cc2S(=O)(=O)c3c(Cl)ccc(Cl)c3	11.7	7.932	3.74	2	-2.015	1	1	0	0	-2.07	0	3	-8.6
1218	CHEMBL568935	CC(=O)c(n1)ccc(c12)n(CCN(C)C)cc2S(=O)(=O)c3cccc(c34)cccc4	1.7	8.77	3.79	1	-2.049	1	1	0	0	-2.252	0	3	-9.1
1219	CHEMBL571215	n1cccc(c12)n(CCN)cc2S(=O)(=O)c(cc3C)ccc3	46	7.337	2.14	1	-1.826	1	1	0	0	-1.975	0	2	-8.6
1220	CHEMBL571413	n1cccc(c12)n(CCN)cc2S(=O)(=O)c3cc(Cl)ccc3	35	7.456	2.48	1	-1.848	1	1	0	0	-1.998	0	2	-8.3
1221	CHEMBL571858	c1ccnc(c12)n(CCN(C)C)cc2S(=O)(=O)c(cc3F)ccc3	4.83333	8.316	2.57	1	-1.852	1	1	0	0	-1.906	0	3	-8.5
1222	CHEMBL571878	CC(=O)c(n1)ccc(c12)n(CCN(C)C)cc2S(=O)(=O)c(cc3F)ccc3	11.3	7.947	2.77	0	-1.789	1	1	0	0	-1.907	0	3	-8.9
1223	CHEMBL572092	CC(=O)c(n1)ccc(c12)n(CCN(C)C)cc2S(=O)(=O)c3ccc(Br)cc3	3.9	8.409	3.4	0	-1.886	1	1	0	0	-2.004	0	3	-8.6
1224	CHEMBL573981	N=C(N)N\N=C\1CCc(c12)ccc(c2)NS(=O)(=O)c(c3)ccc(c34)OCCN4C	26	7.585	1.45	3	-1.053	0	0	0	0	-1.36	1	2	-11.2
1225	CHEMBL574403	s1ccn(c12)c(c(n2)Cl)S(=O)(=O)Nc(c3)ccc(c34)CCC\4=N/NC5=NCCN5	2.2	8.658	2.05	3	-1.972	1	0	0	0	-2.491	1	4	-10.4
1226	CHEMBL574856	N=C(N)N\N=C\1CCc(c12)ccc(c2)NS(=O)(=O)c(c3)ccc(c34)cccc4	62	7.208	2.77	3	-1.107	0	0	0	0	-1.614	0	1	-11.4
1227	CHEMBL575270	N=C(N)N\N=C(CC1(C)C)\c(c12)cc(cc2)NS(=O)(=O)c(c(n3)Cl)n(c34)ccs4	5.2	8.284	2.72	3	-1.971	0	0	0	0	-2.138	0	3	-10.2
1228	CHEMBL575310	CN(C1)CCC1C2=CCc(c23)ccc(c3)NS(=O)(=O)c(c(n4)Cl)n(c45)ccs5	3	8.523	3.74	2	-2.008	1	0	0	0	-2.624	0	3	-10.1
1229	CHEMBL576315	c1ccnc(c12)n(CCN)cc2S(=O)(=O)c3ccccc3	5.5	8.26	1.83	2	-1.97	1	1	0	0	-2.025	0	2	-8.1
1230	CHEMBL577687	c1ccnc(c12)n(CCN)c(C)c2S(=O)(=O)c3ccccc3	4.2	8.377	2.14	1	-1.932	1	1	0	0	-1.989	0	2	-8.6
1231	CHEMBL578411	c1ccccc1Cc(n2)[nH]c(c23)cccc3N4CCNCC4	44.5	7.352	2.56	2	0	1	0	0	0	-1.681	0	2	-8.9
1232	CHEMBL578826	c1ccnc(c12)n(CCN(C)C)cc2S(=O)(=O)c3ccccc3	23	7.638	2.43	2	-1.98	1	1	0	0	-2.035	0	3	-8.2
1233	CHEMBL579063	c1ccnc(c12)n(CCN(C)C)cc2S(=O)(=O)c(cc3)ccc3F	45	7.347	2.57	1	-1.851	1	1	0	0	-1.905	0	3	-8.4
1234	CHEMBL583389	c1ccnc(c12)n(CCN(C)C)cc2S(=O)(=O)c3ccc(s3)Cl	3.3	8.481	3.15	1	-2.325	1	1	0	0	-2.38	0	3	-8
1235	CHEMBL583677	n1cccc(c12)n(CCN)cc2S(=O)(=O)c(cc3F)ccc3	76	7.119	1.97	1	-1.694	1	1	0	0	-1.843	0	2	-8.1
1236	CHEMBL584046	c1ccnc(c12)n(CCN(C)C)cc2S(=O)(=O)c3cc(Cl)ccc3	2.3	8.638	3.08	1	-2	1	1	0	0	-2.054	0	3	-8.6
1237	CHEMBL584474	C1CCCN1CCn(c(c23)nccc3)cc2S(=O)(=O)c4cc(Cl)ccc4	45	7.347	3.62	1	-1.986	1	1	1	0	-2.381	0	3	-9.5
1238	CHEMBL585931	c1ccnc(c12)n(CCN)cc2S(=O)(=O)c(cc3)ccc3F	22	7.658	1.97	2	-1.841	1	1	0	0	-1.895	0	2	-8.3
1239	CHEMBL589390	c1nc(C)ccc1CCn(c2ccc(C)c3)c(c4c23)CCN(C)C4	29.94	7.524	3.88	5	0	1	0	0	0	-1.388	0	3	-10
1240	CHEMBL595301	CC1=C(C)Cc(c12)cc(OC)c(c2)NS(=O)(=O)c(c(n3)Cl)n(c34)ccs4	64	7.194	4.21	2	-1.892	0	0	0	0	-2.172	1	2	-9.1
1241	CHEMBL605292	CC1=CC(C)(C)c(c12)ccc(c2)NS(=O)(=O)c(c(n3)Cl)n(c34)ccs4	80	7.097	4.54	3	-2.006	0	0	0	0	-2.281	0	2	-9.7
1242	CHEMBL605938	C1NCCC1C2=CCc(c23)ccc(c3)NS(=O)(=O)c(c(n4)Cl)n(c45)ccs5	3	8.523	3.4	3	-2.001	1	0	0	0	-2.643	0	2	-9.9
1243	CHEMBL606549	CC(C)c1ccc(cc1)S(=O)(=O)Nc(c2)ccc(c23)[nH]cc3C[C@@H]4CCCN4C	3	8.523	4.73	4	-1.189	1	0	0	0	-2.041	0	1	-10.1
1244	CHEMBL606639	N1CCC[C@@H]1Cc2c[nH]c(c23)ccc(c3)NS(=O)(=O)c4cc(Cl)ccc4	2	8.699	3.92	3	-1.232	1	0	0	0	-2.138	0	0	-9.9
1245	CHEMBL606703	N1CCC[C@@H]1Cc2c[nH]c(c23)ccc(c3)NS(=O)(=O)c(cc4)ccc4F	4	8.398	3.4	3	-1.086	1	0	0	0	-1.99	0	0	-10
1246	CHEMBL606704	N1CCC[C@@H]1Cc2c[nH]c(c23)ccc(c3)NS(=O)(=O)c4ccc(Br)cc4	3	8.523	4.03	3	-1.178	1	0	0	0	-2.097	0	0	-10.2
1247	CHEMBL606705	N1CCC[C@@H]1Cc2c[nH]c(c23)ccc(c3)NS(=O)(=O)c(c4F)ccc(F)c4	8	8.097	3.54	3	-0.938	1	0	0	0	-1.864	0	0	-10.3
1248	CHEMBL606706	CN1CCC[C@H]1Cc2c[nH]c(c23)ccc(c3)NS(=O)(=O)c4ccccc4	16	7.796	3.61	3	-1.27	1	0	0	0	-2.136	0	1	-9.6
1249	CHEMBL606763	CN1CCC[C@H]1Cc2c[nH]c(c23)ccc(c3)NS(=O)(=O)c4c(Cl)cccc4	22	7.658	4.26	3	-1.248	1	0	0	0	-2.099	0	1	-9.6
1250	CHEMBL606764	CN1CCC[C@H]1Cc2c[nH]c(c23)ccc(c3)NS(=O)(=O)c4cc(Cl)ccc4	11	7.959	4.26	2	-1.226	1	0	0	0	-2.077	0	1	-10.3
1251	CHEMBL606765	FC(F)(F)c1cc(ccc1)S(=O)(=O)Nc(c2)ccc(c23)[nH]cc3C[C@@H]4CCCN4C	12	7.921	4.62	3	-1.178	1	0	0	0	-2.031	0	1	-11
1252	CHEMBL606766	CN1CCC[C@H]1Cc2c[nH]c(c23)ccc(c3)NS(=O)(=O)c(cc4)ccc4OC	34	7.469	3.61	4	-1.124	1	0	0	0	-1.974	1	1	-9.9
1253	CHEMBL606815	FC(F)(F)c1ccc(cc1)S(=O)(=O)Nc(c2)ccc(c23)[nH]cc3C[C@@H]4CCCN4C	10	8	4.62	3	-1.18	1	0	0	0	-2.035	0	1	-10.7
1254	CHEMBL606816	FC(F)(F)Oc1ccc(cc1)S(=O)(=O)Nc(c2)ccc(c23)[nH]cc3C[C@@H]4CCCN4C	8	8.097	4.5	4	-1.078	1	0	0	0	-1.938	1	1	-10.4
1255	CHEMBL606818	CN1CCC[C@H]1Cc2c[nH]c(c23)ccc(c3)NS(=O)(=O)c(c4)ccc(Cl)c4Cl	7	8.155	4.91	2	-1.324	1	0	0	0	-2.19	0	1	-10.6
1256	CHEMBL606868	N1CCC[C@H]1Cc2c[nH]c(c23)ccc(c3)NS(=O)(=O)c4cc(Cl)ccc4	36	7.444	3.92	2	-1.233	1	0	0	0	-2.11	0	0	-10.3
1257	CHEMBL609736	CN1CCC[C@H]1Cc2c[nH]c(c23)ccc(c3)NS(=O)(=O)c4c(Cl)cc(F)cc4	35	7.456	4.4	2	-1.161	1	0	0	0	-2.019	0	1	-10.1
1258	CHEMBL609737	N1CCC[C@@H]1Cc2c[nH]c(c23)ccc(c3)NS(=O)(=O)c4ccccc4	4	8.398	3.26	3	-1.214	1	0	0	0	-2.114	0	0	-9.6
1259	CHEMBL609738	N1CCC[C@@H]1Cc2c[nH]c(c23)ccc(c3)NS(=O)(=O)c(c4F)cccc4	4	8.398	3.4	3	-1.074	1	0	0	0	-1.998	0	0	-10.1
1260	CHEMBL609739	CN1CCC[C@H]1Cc2c[nH]c(c23)ccc(c3)NS(=O)(=O)c4c(Br)cccc4	5	8.301	4.37	3	-1.206	1	0	0	0	-2.056	0	1	-9.6
1261	CHEMBL609740	N1CCC[C@@H]1Cc2c[nH]c(c23)ccc(c3)NS(=O)(=O)c(cc4)ccc4C	4	8.398	3.57	3	-1.188	1	0	0	0	-2.089	0	0	-10.3
1262	CHEMBL609742	N1CCC[C@@H]1Cc2c[nH]c(c23)ccc(c3)NS(=O)(=O)c4c(Cl)cccc4	3	8.523	3.92	3	-1.237	1	0	0	0	-2.168	0	0	-10.1
1263	CHEMBL609743	N1CCC[C@@H]1Cc2c[nH]c(c23)ccc(c3)NS(=O)(=O)c4ccc(Cl)cc4	3	8.523	3.92	3	-1.238	1	0	0	0	-2.145	0	0	-9.9
1264	CHEMBL609991	FC(F)(F)c1cc(ccc1)S(=O)(=O)Nc(c2)ccc(c23)[nH]cc3C[C@H]4CCCN4	4	8.398	4.28	2	-1.172	1	0	0	0	-2.076	0	0	-10.6
1265	CHEMBL609993	FC(F)(F)Oc1ccc(cc1)S(=O)(=O)Nc(c2)ccc(c23)[nH]cc3C[C@H]4CCCN4	5	8.301	4.16	3	-1.122	1	0	0	0	-2.034	1	0	-9.7
1266	CHEMBL609996	N1CCC[C@@H]1Cc2c[nH]c(c23)ccc(c3)NS(=O)(=O)c4ccc(I)cc4	1	9	3.87	2	-1.209	1	0	0	0	-2.108	0	0	-10.1
1267	CHEMBL610255	N1CCC[C@@H]1Cc2c[nH]c(c23)ccc(c3)NS(=O)(=O)c4c(Cl)cc(F)cc4	9	8.046	4.06	3	-1.116	1	0	0	0	-2.048	0	0	-10.2
1268	CHEMBL610257	N1CCC[C@@H]1Cc2c[nH]c(c23)ccc(c3)NS(=O)(=O)c(c4)ccc(Cl)c4Cl	3	8.523	4.57	3	-1.269	1	0	0	0	-2.189	0	0	-10.5
1269	CHEMBL610258	CN1CCC[C@H]1Cc2c[nH]c(c23)ccc(c3)NS(=O)(=O)c(c4OC)cc(Cl)cc4	24	7.62	4.27	3	-1.124	1	0	0	0	-1.971	1	1	-9.9
1270	CHEMBL610259	CN1CCC[C@H]1Cc2c[nH]c(c23)ccc(c3)NS(=O)(=O)c4ccc(Br)cc4	9	8.046	4.37	2	-1.239	1	0	0	0	-2.105	0	1	-10.3
1271	CHEMBL71	CN(C)CCCN1c(cccc2)c2Sc(c13)ccc(Cl)c3	50.12	7.3	4.89	5	-1.275	1	0	0	0	-1.275	0	2	-7.7
1272	CHEMBL715	Cc(c1)sc(c12)Nc3c(cccc3)N=C2N(CC4)CCN4C	7.50469	8.125	3.44	1	-0.893	1	0	0	0	-1.524	0	3	-8.5
1273	CHEMBL85	C1CCCn(c12)c(=O)c(c(n2)C)CCN(CC3)CCC3c4noc(c45)cc(F)cc5	962.75	6.016	3.59	9	0	1	1	1	0	-0.973	0	4	-11.1
1274	CHEMBL93240	CN1CCN(CC1)C2Cc(cccc3)c3Sc(c24)ccc(c4)SC	2.525	8.598	4.4	5	-1.329	2	0	0	0	-1.649	0	2	-8.7
1275	CHEMBL95136	Fc1ccc(cc1)S(=O)(=O)c(c2NC)ccc(c2)N3CCCNCC3	1.4	8.854	2.5	4	-1.683	2	0	0	0	-2.15	0	1	-8.9
1276	CHEMBL97158	c1c(Cl)ccc(c12)sc(c2C)S(=O)(=O)Nc(c3)ccc(c34)nccc4N5CCNCC5	1.995	8.7	4.62	2	-1.635	1	0	0	0	-2.208	0	2	-10.6
1277	CHEMBL97211	c1c(Cl)ccc(c12)sc(c2C)S(=O)(=O)Nc(c3)ccc(c34)nc(C)cc4N5CCNCC5	1.259	8.9	4.93	2	-1.637	1	0	0	0	-2.166	0	2	-10.7
1278	CHEMBL98404	CN(C)CCCc1cccc(c12)n(cc2)S(=O)(=O)c3ccccc3	7.9	8.102	3.37	2	-1.476	1	0	0	0	-1.602	0	2	-8.7

## Sheet: Model-Data
ID	Name	Status	Exp. endpoint	Pred. by model eq.	Pred.Mod.Eq.Res.	Pred. LOO	Pred. LOO Res.	HAT i/i (h*=0.0205)	Std.Pred.Mod.Eq. Res.	Std.Pred.LOO Res.
1	CHEMBL1043	Training	6.738	7.612	0.874	7.6218	0.8838	0.011	2.0894	2.1127
2	CHEMBL1076583	Prediction	7.886	8.3436	0.4576	-	-	0.0037	1.09	1.09
3	CHEMBL1076665	Training	8.301	8.3212	0.0202	8.3213	0.0203	0.0036	0.0482	0.0484
4	CHEMBL1076684	Prediction	8.456	8.2275	-0.2285	-	-	0.0033	-0.5442	-0.5442
5	CHEMBL1076687	Training	7.824	8.1302	0.3062	8.1311	0.3071	0.0032	0.729	0.7314
6	CHEMBL1079976	Training	8.149	8.2946	0.1456	8.2952	0.1462	0.004	0.3469	0.3483
7	CHEMBL1079977	Prediction	8.252	8.2687	0.0167	-	-	0.0034	0.0399	0.0399
8	CHEMBL1079978	Training	6.947	7.5725	0.6255	7.578	0.631	0.0088	1.4936	1.5068
9	CHEMBL1080316	Training	8.328	8.231	-0.097	8.2306	-0.0974	0.0033	-0.2311	-0.2318
10	CHEMBL1080331	Training	7.745	8.0252	0.2802	8.026	0.281	0.0029	0.667	0.669
11	CHEMBL1080380	Prediction	7.633	8.2883	0.6553	-	-	0.004	1.5611	1.5611
12	CHEMBL1080381	Training	8.222	8.2932	0.0712	8.2935	0.0715	0.004	0.1696	0.1703
13	CHEMBL1080729	Training	8.824	8.2534	-0.5706	8.2514	-0.5726	0.0034	-1.3589	-1.3635
14	CHEMBL1080899	Training	8.553	8.2387	-0.3143	8.2376	-0.3154	0.0033	-0.7486	-0.751
15	CHEMBL1081094	Prediction	8.137	7.8007	-0.3363	-	-	0.0106	-0.8038	-0.8038
16	CHEMBL1081095	Prediction	8.222	8.2499	0.0279	-	-	0.0034	0.0663	0.0663
17	CHEMBL1081110	Training	7.971	8.0217	0.0507	8.0218	0.0508	0.0029	0.1207	0.121
18	CHEMBL1081793	Prediction	7.796	7.5816	-0.2144	-	-	0.0096	-0.5121	-0.5121
19	CHEMBL1081794	Prediction	8.398	8.0231	-0.3749	-	-	0.0029	-0.8926	-0.8926
20	CHEMBL1082198	Training	8.018	8.1197	0.1017	8.12	0.102	0.003	0.2421	0.2428
21	CHEMBL1082199	Training	8.301	8.1127	-0.1883	8.1121	-0.1889	0.003	-0.4484	-0.4497
22	CHEMBL1082200	Training	7.745	8.2457	0.5007	8.2473	0.5023	0.0033	1.1922	1.1962
23	CHEMBL1082483	Prediction	7.1	7.822	0.722	-	-	0.0041	1.7199	1.7199
24	CHEMBL1082484	Training	8.3	7.4855	-0.8145	7.4817	-0.8183	0.0046	-1.9408	-1.9498
25	CHEMBL1082485	Training	7.5	7.4799	-0.0201	7.4798	-0.0202	0.0046	-0.0478	-0.0481
26	CHEMBL1082764	Prediction	6.9	7.3267	0.4267	-	-	0.0031	1.016	1.016
27	CHEMBL1082818	Training	8.1	7.4092	-0.6908	7.4062	-0.6938	0.0044	-1.6458	-1.6531
28	CHEMBL1083077	Prediction	7.541	7.9501	0.4091	-	-	0.0089	0.977	0.977
29	CHEMBL1083078	Prediction	7.593	7.9326	0.3396	-	-	0.0088	0.8111	0.8111
30	CHEMBL1083297	Training	7.6	7.4191	-0.1809	7.4185	-0.1815	0.0031	-0.4308	-0.4322
31	CHEMBL1083298	Training	7	7.305	0.305	7.306	0.306	0.0031	0.7262	0.7285
32	CHEMBL1083909	Training	7.6	7.4786	-0.1214	7.4783	-0.1217	0.0026	-0.289	-0.2898
33	CHEMBL1084214	Training	7	7.284	0.284	7.2849	0.2849	0.0032	0.6762	0.6784
34	CHEMBL1084316	Training	7.7	7.6159	-0.0841	7.6155	-0.0845	0.0047	-0.2004	-0.2013
35	CHEMBL1084317	Prediction	7.1	7.5977	0.4977	-	-	0.0047	1.186	1.186
36	CHEMBL1084483	Prediction	7.5	7.4289	-0.0711	-	-	0.0031	-0.1694	-0.1694
37	CHEMBL1085351	Training	7.6	7.4597	-0.1403	7.4593	-0.1407	0.0026	-0.334	-0.3349
38	CHEMBL1085352	Prediction	7.5	7.5087	0.0087	-	-	0.0026	0.0206	0.0206
39	CHEMBL1085353	Prediction	7.3	7.3456	0.0456	-	-	0.0029	0.1086	0.1086
40	CHEMBL1085362	Training	7.1	7.5689	0.4689	7.5701	0.4701	0.0026	1.1161	1.1189
41	CHEMBL1085608	Training	8.1	7.459	-0.641	7.4569	-0.6431	0.0031	-1.5264	-1.5312
42	CHEMBL1085835	Training	7.6	8.1197	0.5197	8.1234	0.5234	0.0072	1.2399	1.2489
43	CHEMBL1085965	Training	7.7	7.3981	-0.3019	7.3973	-0.3027	0.0027	-0.7187	-0.7207
44	CHEMBL1086719	Training	8.886	8.2232	-0.6628	8.2208	-0.6652	0.0037	-1.5785	-1.5843
45	CHEMBL1086720	Training	8.337	8.2799	-0.0571	8.2797	-0.0573	0.004	-0.136	-0.1365
46	CHEMBL1091208	Training	8.099	7.9249	-0.1741	7.9234	-0.1756	0.0089	-0.4157	-0.4194
47	CHEMBL1094370	Training	8.495	8.2148	-0.2802	8.2138	-0.2812	0.0036	-0.6673	-0.6697
48	CHEMBL1112	Training	6.623	5.9023	-0.7207	5.8954	-0.7276	0.0096	-1.7215	-1.7382
49	CHEMBL1170091	Training	7.52	7.4561	-0.0639	7.4514	-0.0686	0.0681	-0.1574	-0.1689
50	CHEMBL1170672	Training	8.26	7.699	-0.561	7.6588	-0.6012	0.0669	-1.3807	-1.4797
51	CHEMBL1170871	Training	7.799	7.4169	-0.3821	7.3892	-0.4098	0.0676	-0.9407	-1.0089
52	CHEMBL1172795	Prediction	7.833	7.5632	-0.2698	-	-	0.067	-0.6641	-0.6641
53	CHEMBL1173210	Training	7.058	6.9942	-0.0638	6.9897	-0.0683	0.0651	-0.1569	-0.1679
54	CHEMBL1173508	Prediction	7.337	7.0971	-0.2399	-	-	0.0622	-0.5889	-0.5889
55	CHEMBL1258607	Training	8.097	7.766	-0.331	7.7647	-0.3323	0.0038	-0.7884	-0.7915
56	CHEMBL127411	Training	8.143	7.9041	-0.2389	7.9034	-0.2396	0.0029	-0.5687	-0.5704
57	CHEMBL1275630	Training	8.337	8.5996	0.2626	8.6008	0.2638	0.0044	0.6257	0.6284
58	CHEMBL1276838	Training	8.959	8.4309	-0.5281	8.4291	-0.5299	0.0035	-1.2576	-1.262
59	CHEMBL1276839	Training	7.921	8.3476	0.4266	8.3493	0.4283	0.0038	1.0162	1.0201
60	CHEMBL1276925	Training	9.046	8.4736	-0.5724	8.4715	-0.5745	0.0037	-1.3633	-1.3683
61	CHEMBL1276926	Prediction	8.31	8.2678	-0.0422	-	-	0.0048	-0.1005	-0.1005
62	CHEMBL1277010	Prediction	8.108	8.7305	0.6225	-	-	0.0054	1.4838	1.4838
63	CHEMBL1277011	Training	8.585	8.5492	-0.0358	8.5491	-0.0359	0.0041	-0.0853	-0.0856
64	CHEMBL1277104	Training	8.796	8.3749	-0.4211	8.3725	-0.4235	0.0056	-1.004	-1.0097
65	CHEMBL1277105	Training	8.959	8.4512	-0.5078	8.4489	-0.5101	0.0045	-1.21	-1.2154
66	CHEMBL1277192	Training	7.959	8.3231	0.3641	8.3245	0.3655	0.0037	0.8673	0.8705
67	CHEMBL1277466	Training	8.337	8.4631	0.1261	8.4637	0.1267	0.0046	0.3005	0.3018
68	CHEMBL1277467	Training	8.538	8.5086	-0.0294	8.5085	-0.0295	0.0039	-0.07	-0.0703
69	CHEMBL1277564	Training	8.77	8.3763	-0.3937	8.3741	-0.3959	0.0056	-0.9387	-0.944
70	CHEMBL1277565	Training	8.796	8.4869	-0.3091	8.4854	-0.3106	0.0047	-0.7366	-0.7401
71	CHEMBL1277656	Training	8.77	8.4848	-0.2852	8.4834	-0.2866	0.0047	-0.6797	-0.6829
72	CHEMBL1277657	Training	8.721	8.5737	-0.1473	8.5731	-0.1479	0.0042	-0.3509	-0.3524
73	CHEMBL1277749	Training	6.873	7.629	0.756	7.6329	0.7599	0.0052	1.802	1.8114
74	CHEMBL1277750	Training	6.903	7.6297	0.7267	7.6354	0.7324	0.0079	1.7344	1.7481
75	CHEMBL1277751	Training	8.745	8.4673	-0.2777	8.466	-0.279	0.0046	-0.6617	-0.6648
76	CHEMBL1277752	Training	8.658	8.5744	-0.0836	8.574	-0.084	0.0042	-0.1992	-0.2
77	CHEMBL1277835	Training	7.056	7.7578	0.7018	7.7605	0.7045	0.0039	1.6717	1.6782
78	CHEMBL1277836	Training	8.745	8.5989	-0.1461	8.5982	-0.1468	0.0044	-0.3481	-0.3497
79	CHEMBL1277837	Training	8.538	8.4813	-0.0567	8.481	-0.057	0.0047	-0.1351	-0.1358
80	CHEMBL1277916	Training	7.319	7.8417	0.5227	7.8452	0.5262	0.0065	1.2468	1.255
81	CHEMBL1277917	Prediction	8.721	8.4932	-0.2278	-	-	0.0038	-0.5426	-0.5426
82	CHEMBL1277918	Prediction	8.854	8.5807	-0.2733	-	-	0.0043	-0.6511	-0.6511
83	CHEMBL1277998	Training	8.26	8.1992	-0.0608	8.199	-0.061	0.0043	-0.1448	-0.1454
84	CHEMBL1277999	Training	8.77	8.3238	-0.4462	8.3222	-0.4478	0.0037	-1.0627	-1.0666
85	CHEMBL1278000	Training	8.699	8.5737	-0.1253	8.5732	-0.1258	0.0042	-0.2985	-0.2998
86	CHEMBL1278001	Training	8.125	8.5905	0.4655	8.5925	0.4675	0.0043	1.1091	1.1139
87	CHEMBL1278090	Training	8.284	8.2153	-0.0687	8.215	-0.069	0.0044	-0.1636	-0.1644
88	CHEMBL1278091	Training	8.398	8.3147	-0.0833	8.3143	-0.0837	0.0051	-0.1985	-0.1996
89	CHEMBL1278092	Training	8.495	8.5135	0.0185	8.5136	0.0186	0.0039	0.0441	0.0443
90	CHEMBL1278179	Training	9	8.4071	-0.5929	8.4046	-0.5954	0.0042	-1.4125	-1.4184
91	CHEMBL1278180	Prediction	8.092	8.4295	0.3375	-	-	0.0043	0.8041	0.8041
92	CHEMBL131495	Prediction	6.4	5.6723	-0.7277	-	-	0.0072	-1.7363	-1.7363
93	CHEMBL142936	Training	6.24	6.1194	-0.1206	6.1184	-0.1216	0.0078	-0.2879	-0.2902
94	CHEMBL1628227	Training	6.979	6.9731	-0.0059	6.9731	-0.0059	0.0049	-0.014	-0.0141
95	CHEMBL1642114	Training	9.071	8.5023	-0.5687	8.5002	-0.5708	0.0037	-1.3544	-1.3594
96	CHEMBL1642412	Training	8.469	7.7837	-0.6853	7.782	-0.687	0.0025	-1.6312	-1.6352
97	CHEMBL1642413	Training	7.928	7.7992	-0.1288	7.7988	-0.1292	0.003	-0.3068	-0.3077
98	CHEMBL1642414	Training	7.967	7.9048	-0.0622	7.9047	-0.0623	0.0029	-0.148	-0.1484
99	CHEMBL1642415	Training	7.818	7.888	0.07	7.8882	0.0702	0.0029	0.1667	0.1672
100	CHEMBL1642416	Training	7.799	7.9006	0.1016	7.9009	0.1019	0.0029	0.242	0.2427
101	CHEMBL1642417	Training	8.066	7.3451	-0.7209	7.3384	-0.7276	0.0091	-1.7217	-1.7376
102	CHEMBL1642418	Training	8.108	7.8642	-0.2438	7.8635	-0.2445	0.0029	-0.5804	-0.5821
103	CHEMBL1642419	Training	8.036	7.8741	-0.1619	7.8734	-0.1626	0.0042	-0.3858	-0.3874
104	CHEMBL1642420	Training	7.975	7.231	-0.744	7.2242	-0.7508	0.0091	-1.7769	-1.7932
105	CHEMBL1642421	Training	7.635	7.8341	0.1991	7.8347	0.1997	0.003	0.4742	0.4756
106	CHEMBL1642422	Training	7.521	7.3101	-0.2109	7.3082	-0.2128	0.0091	-0.5037	-0.5083
107	CHEMBL1642424	Training	7.971	7.2632	-0.7078	7.2567	-0.7143	0.0091	-1.6904	-1.706
108	CHEMBL1642425	Prediction	7.693	7.3409	-0.3521	-	-	0.0091	-0.8409	-0.8409
109	CHEMBL1642426	Training	7.516	7.336	-0.18	7.3343	-0.1817	0.0091	-0.4299	-0.4339
110	CHEMBL1642427	Training	7.085	7.301	0.216	7.303	0.218	0.0091	0.5159	0.5206
111	CHEMBL1642428	Prediction	7.257	7.664	0.407	-	-	0.0026	0.9689	0.9689
112	CHEMBL1642429	Training	7.197	7.1078	-0.0892	7.1072	-0.0898	0.0074	-0.2128	-0.2144
113	CHEMBL1642430	Prediction	7.593	7.3234	-0.2696	-	-	0.0091	-0.6439	-0.6439
114	CHEMBL1642431	Training	7.52	7.8887	0.3687	7.8898	0.3698	0.0029	0.8779	0.8805
115	CHEMBL1642845	Training	8.553	9.0209	0.4679	9.0278	0.4748	0.0147	1.1206	1.1373
116	CHEMBL1642846	Training	8.377	8.8552	0.4782	8.8589	0.4819	0.0076	1.1413	1.1501
117	CHEMBL1642848	Training	8.174	9.0517	0.8777	9.0633	0.8893	0.013	2.1003	2.128
118	CHEMBL1642849	Training	8.854	9.058	0.204	9.0607	0.2067	0.0131	0.4881	0.4946
119	CHEMBL1642850	Training	8.367	9.058	0.691	9.0671	0.7001	0.0131	1.6536	1.6754
120	CHEMBL1642851	Training	9.155	9.1273	-0.0277	9.1269	-0.0281	0.0123	-0.0663	-0.0671
121	CHEMBL1642852	Prediction	8.77	9.0629	0.2929	-	-	0.0131	0.7009	0.7009
122	CHEMBL1642853	Training	8.456	9.051	0.595	9.0588	0.6028	0.013	1.4238	1.4426
123	CHEMBL1642862	Prediction	7.921	8.7138	0.7928	-	-	0.0076	1.8921	1.8921
124	CHEMBL1642863	Training	7.854	8.7089	0.8549	8.7155	0.8615	0.0076	2.0402	2.0558
125	CHEMBL1642866	Training	8.959	8.1728	-0.7862	8.1702	-0.7888	0.0034	-1.8722	-1.8786
126	CHEMBL1642867	Training	7.62	8.3289	0.7089	8.3315	0.7115	0.0036	1.6885	1.6947
127	CHEMBL1642869	Prediction	7.187	7.5508	0.3638	-	-	0.0086	0.8686	0.8686
128	CHEMBL1642870	Prediction	7.921	7.6474	-0.2736	-	-	0.0092	-0.6535	-0.6535
129	CHEMBL1642871	Prediction	7.509	8.2988	0.7898	-	-	0.0035	1.8811	1.8811
130	CHEMBL1642872	Training	8.469	8.1274	-0.3416	8.1263	-0.3427	0.0032	-0.8135	-0.8161
131	CHEMBL1642873	Training	8.319	8.2422	-0.0768	8.2419	-0.0771	0.0033	-0.183	-0.1836
132	CHEMBL1642874	Training	7.569	7.6012	0.0322	7.6015	0.0325	0.0089	0.0769	0.0776
133	CHEMBL1642875	Training	7.62	7.716	0.096	7.717	0.097	0.0102	0.2294	0.2318
134	CHEMBL1642877	Training	8.009	8.203	0.194	8.2036	0.1946	0.0032	0.4619	0.4634
135	CHEMBL1642878	Training	8.538	8.697	0.159	8.6983	0.1603	0.0075	0.3795	0.3824
136	CHEMBL1642880	Training	8.509	9.0314	0.5224	9.0377	0.5287	0.0118	1.2494	1.2644
137	CHEMBL1642882	Training	9	9.0412	0.0412	9.0417	0.0417	0.0119	0.0986	0.0998
138	CHEMBL1642883	Training	9.097	9.0132	-0.0838	9.0122	-0.0848	0.0118	-0.2004	-0.2027
139	CHEMBL1642885	Training	8.638	9.0601	0.4221	9.0652	0.4272	0.012	1.0096	1.0218
140	CHEMBL1642886	Prediction	9	9.0125	0.0125	-	-	0.0118	0.0299	0.0299
141	CHEMBL1642887	Training	8.824	9.0139	0.1899	9.0162	0.1922	0.0118	0.4542	0.4596
142	CHEMBL1642889	Training	9.222	8.9782	-0.2438	8.9754	-0.2466	0.0116	-0.5829	-0.5898
143	CHEMBL1668501	Training	7.78	7.9123	0.1323	7.9135	0.1335	0.0088	0.316	0.3188
144	CHEMBL1668502	Prediction	7.64	8.0131	0.3731	-	-	0.0092	0.8912	0.8912
145	CHEMBL1668570	Prediction	7.82	7.9438	0.1238	-	-	0.009	0.2957	0.2957
146	CHEMBL1668574	Training	8.17	7.7815	-0.3885	7.7783	-0.3917	0.0081	-0.9275	-0.9351
147	CHEMBL1668575	Prediction	6.88	7.7373	0.8573	-	-	0.0085	2.0469	2.0469
148	CHEMBL1668576	Training	8.4	7.9194	-0.4806	7.9151	-0.4849	0.0088	-1.1477	-1.1579
149	CHEMBL1668577	Training	7.43	7.8059	0.3759	7.8091	0.3791	0.0082	0.8975	0.9049
150	CHEMBL1668578	Training	7.43	7.8906	0.4606	7.8947	0.4647	0.0087	1.0999	1.1095
151	CHEMBL1668579	Training	7.35	7.8584	0.5084	7.8628	0.5128	0.0085	1.2139	1.2243
152	CHEMBL1668581	Training	8.1	7.7205	-0.3795	7.7173	-0.3827	0.0084	-0.9059	-0.9136
153	CHEMBL1668583	Prediction	8.41	8.3966	-0.0134	-	-	0.0033	-0.0318	-0.0318
154	CHEMBL1668585	Prediction	8.84	8.4785	-0.3615	-	-	0.0036	-0.8609	-0.8609
155	CHEMBL1668587	Training	8.12	8.4618	0.3418	8.463	0.343	0.0035	0.8139	0.8168
156	CHEMBL1668589	Training	8.93	8.4022	-0.5278	8.4005	-0.5295	0.0033	-1.2568	-1.261
157	CHEMBL1668593	Training	7.93	8.3036	0.3736	8.3047	0.3747	0.003	0.8894	0.892
158	CHEMBL1668594	Training	8.7	8.3722	-0.3278	8.3711	-0.3289	0.0033	-0.7807	-0.7833
159	CHEMBL1668595	Training	8.02	8.1587	0.1387	8.1591	0.1391	0.0029	0.3301	0.3311
160	CHEMBL1733660	Training	7.056	6.9458	-0.1102	6.945	-0.111	0.0073	-0.2629	-0.2648
161	CHEMBL175718	Training	6.474	7.0803	0.6063	7.0851	0.6111	0.008	1.4471	1.4588
162	CHEMBL175732	Training	6.9	7.2335	0.3335	7.2376	0.3376	0.0122	0.7977	0.8075
163	CHEMBL175794	Training	6.935	7.3917	0.4567	7.3958	0.4608	0.0088	1.0907	1.1004
164	CHEMBL175798	Training	6.932	7.2469	0.3149	7.2495	0.3175	0.0082	0.7517	0.7579
165	CHEMBL175940	Training	8.721	8.5086	-0.2124	8.5075	-0.2135	0.0049	-0.5062	-0.5087
166	CHEMBL175980	Training	6.882	6.9571	0.0751	6.9575	0.0755	0.0056	0.1791	0.1801
167	CHEMBL176117	Training	7.827	8.0306	0.2036	8.0311	0.2041	0.0025	0.4846	0.4858
168	CHEMBL176134	Training	6.852	7.2896	0.4376	7.2933	0.4413	0.0084	1.0446	1.0534
169	CHEMBL176218	Training	7.735	7.9228	0.1878	7.9246	0.1896	0.0098	0.4487	0.4531
170	CHEMBL1762569	Training	7.839	7.7654	-0.0736	7.7648	-0.0742	0.0081	-0.1758	-0.1772
171	CHEMBL1762570	Training	7.052	7.7661	0.7141	7.7719	0.7199	0.0081	1.7045	1.7183
172	CHEMBL177005	Training	6.997	7.1916	0.1946	7.1932	0.1962	0.0082	0.4645	0.4683
173	CHEMBL178123	Training	7.538	7.6879	0.1499	7.6882	0.1502	0.0025	0.3567	0.3576
174	CHEMBL178193	Training	7.721	7.8992	0.1782	7.8998	0.1788	0.0029	0.4243	0.4256
175	CHEMBL178234	Prediction	8.523	8.1456	-0.3774	-	-	0.0031	-0.8987	-0.8987
176	CHEMBL1782357	Training	7.092	7.2044	0.1124	7.2063	0.1143	0.0165	0.2695	0.2741
177	CHEMBL1782358	Prediction	7.301	7.1995	-0.1015	-	-	0.0165	-0.2432	-0.2432
178	CHEMBL1782359	Training	6.959	7.203	0.244	7.2071	0.2481	0.0165	0.585	0.5948
179	CHEMBL1782360	Training	7.638	7.2339	-0.4041	7.2274	-0.4106	0.0157	-0.9684	-0.9839
180	CHEMBL1782361	Training	6.959	7.1513	0.1923	7.1544	0.1954	0.0163	0.4608	0.4685
181	CHEMBL1782362	Training	7.108	7.1478	0.0398	7.1484	0.0404	0.0163	0.0953	0.0969
182	CHEMBL1782363	Prediction	6.824	7.2248	0.4008	-	-	0.0157	0.9603	0.9603
183	CHEMBL1782364	Training	6.796	7.1331	0.3371	7.1386	0.3426	0.0163	0.8079	0.8212
184	CHEMBL1782365	Training	6.481	7.1729	0.6919	7.1845	0.7035	0.0164	1.6587	1.6863
185	CHEMBL1782366	Prediction	6.523	7.1806	0.6576	-	-	0.0164	1.5765	1.5765
186	CHEMBL1783582	Prediction	7.854	8.2181	0.3641	-	-	0.0045	0.8676	0.8676
187	CHEMBL1783599	Training	7.26	8.1334	0.8734	8.1386	0.8786	0.006	2.0826	2.0951
188	CHEMBL1783601	Training	7.721	8.3553	0.6343	8.3578	0.6368	0.0039	1.5109	1.5168
189	CHEMBL1783607	Training	8.42	8.4267	0.0067	8.4267	0.0067	0.0043	0.016	0.016
190	CHEMBL1783608	Prediction	8.018	8.1852	0.1672	-	-	0.0042	0.3984	0.3984
191	CHEMBL1785058	Training	7.55	7.2892	-0.2608	7.2836	-0.2664	0.0212	-0.6266	-0.6402
192	CHEMBL1785060	Training	7.836	7.7055	-0.1305	7.7048	-0.1312	0.0057	-0.3111	-0.3129
193	CHEMBL1785061	Training	7.747	7.7776	0.0306	7.7778	0.0308	0.0057	0.0729	0.0734
194	CHEMBL1785062	Training	7.947	7.7965	-0.1505	7.7956	-0.1514	0.0057	-0.3588	-0.3609
195	CHEMBL1785063	Training	8.081	7.7916	-0.2894	7.7899	-0.2911	0.0057	-0.69	-0.694
196	CHEMBL1785064	Training	7.745	7.8406	0.0956	7.8411	0.0961	0.0058	0.2279	0.2292
197	CHEMBL1785066	Prediction	8.502	7.8749	-0.6271	-	-	0.0072	-1.4962	-1.4962
198	CHEMBL1785067	Training	8.11	7.7909	-0.3191	7.7891	-0.3209	0.0057	-0.7608	-0.7652
199	CHEMBL1785069	Training	7.827	7.7776	-0.0494	7.7773	-0.0497	0.0057	-0.1178	-0.1185
200	CHEMBL1785070	Training	8.588	7.828	-0.76	7.8225	-0.7655	0.0072	-1.8133	-1.8265
201	CHEMBL1785071	Training	8.254	7.7384	-0.5156	7.7346	-0.5194	0.0073	-1.2302	-1.2393
202	CHEMBL1785073	Prediction	8.03	7.8308	-0.1992	-	-	0.0058	-0.475	-0.475
203	CHEMBL178767	Training	8.155	7.8866	-0.2684	7.8859	-0.2691	0.0029	-0.6389	-0.6408
204	CHEMBL178869	Prediction	7.699	7.7956	0.0966	-	-	0.0025	0.23	0.23
205	CHEMBL178870	Training	8.523	7.8285	-0.6945	7.8268	-0.6962	0.0025	-1.6531	-1.6573
206	CHEMBL179006	Training	7.73	7.4302	-0.2998	7.4275	-0.3025	0.009	-0.7159	-0.7224
207	CHEMBL179034	Training	7.287	7.2531	-0.0339	7.2529	-0.0341	0.006	-0.0807	-0.0812
208	CHEMBL179173	Training	7.569	7.7319	0.1629	7.7324	0.1634	0.0025	0.3879	0.3888
209	CHEMBL179232	Training	7.114	7.2729	0.1589	7.2738	0.1598	0.0056	0.3788	0.3809
210	CHEMBL179264	Training	6.71	6.6667	-0.0433	6.6663	-0.0437	0.0071	-0.1034	-0.1041
211	CHEMBL179344	Training	7.701	7.9571	0.2561	7.9579	0.2569	0.0031	0.6098	0.6117
212	CHEMBL180066	Training	8	7.7775	-0.2225	7.7768	-0.2232	0.0031	-0.5299	-0.5315
213	CHEMBL180221	Training	8	7.8957	-0.1043	7.8954	-0.1046	0.0029	-0.2482	-0.249
214	CHEMBL180765	Training	8.301	7.781	-0.52	7.7794	-0.5216	0.0031	-1.2382	-1.242
215	CHEMBL180823	Training	7.854	7.8145	-0.0395	7.8144	-0.0396	0.0025	-0.094	-0.0942
216	CHEMBL180826	Training	7.921	7.7781	-0.1429	7.7778	-0.1432	0.0025	-0.3401	-0.3409
217	CHEMBL181425	Training	7.301	7.8677	0.5667	7.8692	0.5682	0.0025	1.349	1.3525
218	CHEMBL181938	Training	7.268	7.3489	0.0809	7.3496	0.0816	0.0091	0.1931	0.1949
219	CHEMBL182000	Training	8.398	7.8628	-0.5352	7.8615	-0.5365	0.0025	-1.274	-1.2772
220	CHEMBL182099	Training	8.301	7.8005	-0.5005	7.7993	-0.5017	0.0025	-1.1913	-1.1943
221	CHEMBL183203	Training	7.699	8.2729	0.5739	8.2749	0.5759	0.0034	1.3668	1.3715
222	CHEMBL1834221	Training	7.556	7.7479	0.1919	7.7483	0.1923	0.0023	0.4566	0.4577
223	CHEMBL1834225	Training	7.47	7.7234	0.2534	7.724	0.254	0.0023	0.603	0.6044
224	CHEMBL1834226	Training	8.058	7.7318	-0.3262	7.731	-0.327	0.0023	-0.7765	-0.7783
225	CHEMBL1834227	Training	7.836	7.7325	-0.1035	7.7322	-0.1038	0.0023	-0.2464	-0.247
226	CHEMBL1834228	Training	7.75	7.7346	-0.0154	7.7345	-0.0155	0.0023	-0.0367	-0.0368
227	CHEMBL1834229	Prediction	7.616	7.4169	-0.1991	-	-	0.0084	-0.4754	-0.4754
228	CHEMBL1834230	Training	8.097	7.7346	-0.3624	7.7337	-0.3633	0.0023	-0.8626	-0.8646
229	CHEMBL1834231	Training	7.47	7.6219	0.1519	7.6222	0.1522	0.0025	0.3615	0.3624
230	CHEMBL1834234	Training	7.622	7.5666	-0.0554	7.5664	-0.0556	0.0025	-0.1319	-0.1323
231	CHEMBL1834235	Training	8.032	7.5736	-0.4584	7.5724	-0.4596	0.0025	-1.0912	-1.094
232	CHEMBL1834238	Training	8.086	7.6562	-0.4298	7.6551	-0.4309	0.0024	-1.0231	-1.0255
233	CHEMBL1834240	Training	7.733	7.736	0.003	7.736	0.003	0.0023	0.007	0.0071
234	CHEMBL1834241	Training	7.77	7.638	-0.132	7.6377	-0.1323	0.0024	-0.3142	-0.315
235	CHEMBL1834242	Training	7.747	7.6898	-0.0572	7.6896	-0.0574	0.0024	-0.1362	-0.1365
236	CHEMBL1834243	Prediction	7.562	7.5953	0.0333	-	-	0.0025	0.0792	0.0792
237	CHEMBL1834332	Training	7.575	7.6625	0.0875	7.6627	0.0877	0.0024	0.2082	0.2087
238	CHEMBL1834333	Training	8.102	7.757	-0.345	7.7562	-0.3458	0.0023	-0.8212	-0.8231
239	CHEMBL1834334	Training	7.66	7.743	0.083	7.7432	0.0832	0.0023	0.1975	0.1979
240	CHEMBL1834335	Training	6.923	7.7584	0.8354	7.7603	0.8373	0.0023	1.9882	1.9928
241	CHEMBL1834338	Prediction	8.252	7.6974	-0.5546	-	-	0.0025	-1.3201	-1.3201
242	CHEMBL1834339	Training	7.764	7.6709	-0.0931	7.6707	-0.0933	0.0024	-0.2217	-0.2222
243	CHEMBL1834340	Training	8.071	7.8059	-0.2651	7.8052	-0.2658	0.0027	-0.631	-0.6327
244	CHEMBL1834341	Training	8.102	8.3805	0.2785	8.3814	0.2794	0.0032	0.6633	0.6654
245	CHEMBL1834342	Training	8.387	7.9935	-0.3935	7.9925	-0.3945	0.0024	-0.9366	-0.9389
246	CHEMBL1834345	Training	7.618	7.7311	0.1131	7.7313	0.1133	0.0023	0.2691	0.2697
247	CHEMBL1834346	Training	7.302	7.8494	0.5474	7.8508	0.5488	0.0026	1.303	1.3065
248	CHEMBL1834347	Training	8.194	7.8466	-0.3474	7.8456	-0.3484	0.0026	-0.8271	-0.8293
249	CHEMBL1834348	Training	8.284	7.8508	-0.4332	7.8496	-0.4344	0.0026	-1.0313	-1.0341
250	CHEMBL1834349	Training	7.148	7.8522	0.7042	7.854	0.706	0.0026	1.6763	1.6807
251	CHEMBL1834350	Training	8.143	8.291	0.148	8.2926	0.1496	0.011	0.3537	0.3576
252	CHEMBL1834351	Training	7.036	7.7332	0.6972	7.7348	0.6988	0.0023	1.6593	1.6632
253	CHEMBL184640	Prediction	7.638	8.3359	0.6979	-	-	0.0037	1.6623	1.6623
254	CHEMBL184652	Prediction	8.244	8.1308	-0.1132	-	-	0.0043	-0.2696	-0.2696
255	CHEMBL184671	Training	7.377	8.1497	0.7727	8.1523	0.7753	0.0033	1.8402	1.8463
256	CHEMBL185672	Training	7.244	8.2527	1.0087	8.2561	1.0121	0.0034	2.402	2.4101
257	CHEMBL185850	Training	7.602	8.1694	0.5674	8.1712	0.5692	0.0031	1.351	1.3552
258	CHEMBL185958	Training	8.432	8.2449	-0.1871	8.2442	-0.1878	0.0038	-0.4456	-0.4473
259	CHEMBL186585	Prediction	7.569	8.0504	0.4814	-	-	0.0029	1.1461	1.1461
260	CHEMBL186621	Training	7.495	7.0816	-0.4134	7.0794	-0.4156	0.0053	-0.9854	-0.9907
261	CHEMBL187278	Training	8.301	7.7781	-0.5229	7.7768	-0.5242	0.0025	-1.2446	-1.2477
262	CHEMBL188182	Training	7.602	8.1602	0.5582	8.1621	0.5601	0.0034	1.3294	1.3339
263	CHEMBL188285	Training	7.434	7.8873	0.4533	7.8887	0.4547	0.0029	1.0793	1.0825
264	CHEMBL188864	Training	8.108	7.8859	-0.2221	7.8853	-0.2227	0.0029	-0.5287	-0.5302
265	CHEMBL191429	Training	8.638	7.9998	-0.6382	7.9982	-0.6398	0.0024	-1.5191	-1.5228
266	CHEMBL1916745	Training	4.537	5.0687	0.5317	5.0786	0.5416	0.0182	1.2758	1.2994
267	CHEMBL1916746	Training	4.69	5.2857	0.5957	5.2966	0.6066	0.0179	1.4291	1.4552
268	CHEMBL1917342	Prediction	6.084	6.2946	0.2106	-	-	0.0074	0.5026	0.5026
269	CHEMBL1917346	Training	6.229	6.4578	0.2288	6.4592	0.2302	0.0063	0.5456	0.5491
270	CHEMBL1922617	Training	7.73	8.3855	0.6555	8.3877	0.6577	0.0034	1.5609	1.5662
271	CHEMBL1922618	Prediction	9.24	8.9209	-0.3191	-	-	0.0115	-0.7631	-0.7631
272	CHEMBL1922623	Prediction	7.78	8.3701	0.5901	-	-	0.0033	1.4052	1.4052
273	CHEMBL1922624	Prediction	8.36	8.9377	0.5777	-	-	0.0115	1.3813	1.3813
274	CHEMBL1922625	Training	8.73	8.6677	-0.0623	8.6672	-0.0628	0.0079	-0.1487	-0.1499
275	CHEMBL1922626	Training	8.74	8.653	-0.087	8.6523	-0.0877	0.0079	-0.2076	-0.2093
276	CHEMBL1922627	Training	8.51	8.6432	0.1332	8.6443	0.1343	0.008	0.318	0.3205
277	CHEMBL1922629	Training	9.01	8.6712	-0.3388	8.6685	-0.3415	0.0079	-0.8086	-0.8151
278	CHEMBL1922631	Prediction	8.33	8.4499	0.1199	-	-	0.0035	0.2854	0.2854
279	CHEMBL1922633	Training	9.19	8.6292	-0.5608	8.6247	-0.5653	0.008	-1.3385	-1.3493
280	CHEMBL1922634	Training	8.85	8.5347	-0.3153	8.5321	-0.3179	0.0082	-0.7526	-0.7588
281	CHEMBL1922636	Training	9.15	8.6355	-0.5145	8.6314	-0.5186	0.008	-1.228	-1.2379
282	CHEMBL1922637	Training	9.05	8.541	-0.509	8.5369	-0.5131	0.0082	-1.2149	-1.2249
283	CHEMBL1922639	Prediction	8.86	8.9902	0.1302	-	-	0.0116	0.3112	0.3112
284	CHEMBL1922640	Training	8.68	8.9916	0.3116	8.9952	0.3152	0.0116	0.745	0.7538
285	CHEMBL1922641	Training	8.569	8.7703	0.2013	8.7729	0.2039	0.0129	0.4817	0.488
286	CHEMBL1922716	Prediction	8.854	8.6457	-0.2083	-	-	0.0122	-0.4981	-0.4981
287	CHEMBL193376	Training	6.194	6.4286	0.2346	6.4307	0.2367	0.0089	0.5603	0.5653
288	CHEMBL193379	Training	8.3	8.1944	-0.1056	8.1941	-0.1059	0.0027	-0.2514	-0.2521
289	CHEMBL193400	Training	8.852	8.2315	-0.6205	8.2298	-0.6222	0.0027	-1.4772	-1.4813
290	CHEMBL193637	Training	5.35	6.1031	0.7531	6.1112	0.7612	0.0106	1.8	1.8194
291	CHEMBL193657	Training	7.367	7.8838	0.5168	7.8854	0.5184	0.0029	1.2305	1.2341
292	CHEMBL193665	Training	8.8	8.179	-0.621	8.1773	-0.6227	0.0026	-1.4783	-1.4822
293	CHEMBL193824	Training	8.337	7.7907	-0.5463	7.7894	-0.5476	0.0025	-1.3003	-1.3036
294	CHEMBL193841	Training	7.301	7.0816	-0.2194	7.0804	-0.2206	0.0053	-0.523	-0.5258
295	CHEMBL194307	Training	8.653	7.8901	-0.7629	7.8879	-0.7651	0.0029	-1.8163	-1.8216
296	CHEMBL194311	Prediction	7.602	8.1631	0.5611	-	-	0.0031	1.336	1.336
297	CHEMBL194360	Training	6.936	7.7214	0.7854	7.7235	0.7875	0.0027	1.8697	1.8748
298	CHEMBL194465	Training	7.638	7.6144	-0.0236	7.6143	-0.0237	0.0026	-0.0562	-0.0564
299	CHEMBL194568	Prediction	7.979	7.6865	-0.2925	-	-	0.0025	-0.6964	-0.6964
300	CHEMBL194750	Prediction	8	7.8286	-0.1714	-	-	0.003	-0.4082	-0.4082
301	CHEMBL194834	Training	7.31	7.9062	0.5962	7.908	0.598	0.0029	1.4195	1.4237
302	CHEMBL194904	Prediction	7.886	7.9013	0.0153	-	-	0.0029	0.0365	0.0365
303	CHEMBL1949963	Training	6.857	6.1344	-0.7226	6.1278	-0.7292	0.0089	-1.7257	-1.7413
304	CHEMBL1949964	Training	6.81	6.4564	-0.3536	6.4541	-0.3559	0.0064	-0.8434	-0.8488
305	CHEMBL1949965	Training	6.401	6.1854	-0.2156	6.1835	-0.2175	0.0088	-0.5147	-0.5193
306	CHEMBL1949967	Training	6.47	6.3521	-0.1179	6.3513	-0.1187	0.0066	-0.2813	-0.2832
307	CHEMBL1949968	Training	5.814	6.4018	0.5878	6.4056	0.5916	0.0065	1.4018	1.411
308	CHEMBL1949970	Training	6.125	6.4367	0.3117	6.4387	0.3137	0.0064	0.7435	0.7483
309	CHEMBL1949972	Training	6.896	6.4437	-0.4523	6.4404	-0.4556	0.0072	-1.0791	-1.0869
310	CHEMBL1949973	Training	6.833	6.5333	-0.2997	6.5315	-0.3015	0.006	-0.7145	-0.7189
311	CHEMBL195018	Training	8.398	7.8985	-0.4995	7.8971	-0.5009	0.0029	-1.1891	-1.1926
312	CHEMBL195317	Training	7	6.7561	-0.2439	6.7547	-0.2453	0.0057	-0.5815	-0.5849
313	CHEMBL195987	Training	7.38	7.6885	0.3085	7.6893	0.3093	0.0026	0.7345	0.7364
314	CHEMBL196094	Training	8.155	7.7984	-0.3566	7.7975	-0.3575	0.0025	-0.8488	-0.8509
315	CHEMBL196103	Training	8.1	8.3008	0.2008	8.3014	0.2014	0.0029	0.478	0.4794
316	CHEMBL196622	Training	8.398	8.14	-0.258	8.1392	-0.2588	0.0031	-0.6144	-0.6162
317	CHEMBL196644	Prediction	8.5	8.5079	0.0079	-	-	0.0039	0.0188	0.0188
318	CHEMBL196661	Training	7.664	7.8551	0.1911	7.8557	0.1917	0.003	0.4551	0.4564
319	CHEMBL196743	Training	8	7.7473	-0.2527	7.7467	-0.2533	0.0025	-0.6014	-0.6029
320	CHEMBL196791	Training	7.658	7.8138	0.1558	7.8142	0.1562	0.0025	0.3709	0.3719
321	CHEMBL196792	Training	7.796	7.83	0.034	7.8301	0.0341	0.003	0.0808	0.0811
322	CHEMBL196926	Training	7.886	7.7061	-0.1799	7.7055	-0.1805	0.0033	-0.4284	-0.4298
323	CHEMBL197297	Training	8.6	8.5856	-0.0144	8.5855	-0.0145	0.0043	-0.0343	-0.0345
324	CHEMBL197397	Training	7.398	7.8307	0.4327	7.8319	0.4339	0.003	1.0301	1.0332
325	CHEMBL197407	Training	7.714	7.72	0.006	7.7201	0.0061	0.0025	0.0144	0.0144
326	CHEMBL197574	Training	8.9	8.3211	-0.5789	8.3193	-0.5807	0.003	-1.3784	-1.3826
327	CHEMBL197845	Training	8.097	7.3463	-0.7507	7.3439	-0.7531	0.0031	-1.7875	-1.7931
328	CHEMBL198766	Training	7.854	7.8012	-0.0528	7.8011	-0.0529	0.0025	-0.1256	-0.1259
329	CHEMBL198827	Prediction	8.523	7.888	-0.635	-	-	0.0029	-1.5117	-1.5117
330	CHEMBL198941	Training	7.921	7.9314	0.0104	7.9315	0.0105	0.0029	0.0248	0.0249
331	CHEMBL2058415	Training	5.851	5.9335	0.0825	5.9349	0.0839	0.0166	0.1979	0.2012
332	CHEMBL2058418	Training	5.637	5.825	0.188	5.8282	0.1912	0.0163	0.4507	0.4582
333	CHEMBL2058703	Training	5.428	5.9335	0.5055	5.9421	0.5141	0.0166	1.212	1.2324
334	CHEMBL2058704	Training	6.066	5.9335	-0.1325	5.9313	-0.1347	0.0166	-0.3176	-0.3229
335	CHEMBL209383	Training	7.301	7.8313	0.5303	7.8329	0.5319	0.0029	1.2626	1.2663
336	CHEMBL209909	Training	6.538	7.4128	0.8748	7.4155	0.8775	0.0031	2.0829	2.0894
337	CHEMBL2103880	Training	8.886	8.3623	-0.5237	8.3603	-0.5257	0.0039	-1.2474	-1.2523
338	CHEMBL211577	Training	8.053	8.2076	0.1546	8.2083	0.1553	0.0044	0.3684	0.37
339	CHEMBL211688	Training	6.939	7.8269	0.8879	7.8293	0.8903	0.0027	2.1138	2.1195
340	CHEMBL212063	Prediction	7.678	7.5136	-0.1644	-	-	0.0026	-0.3914	-0.3914
341	CHEMBL212178	Training	7.284	7.515	0.231	7.5156	0.2316	0.0026	0.5498	0.5512
342	CHEMBL212227	Training	7.42	7.4044	-0.0156	7.4043	-0.0157	0.0031	-0.0372	-0.0373
343	CHEMBL213586	Training	7.208	7.8304	0.6224	7.8321	0.6241	0.0027	1.4817	1.4858
344	CHEMBL213589	Training	7.432	7.9426	0.5106	7.944	0.512	0.0027	1.2155	1.2187
345	CHEMBL2159457	Prediction	6.504	6.7881	0.2841	-	-	0.0056	0.6774	0.6774
346	CHEMBL2159458	Training	6.502	6.359	-0.143	6.3577	-0.1443	0.0088	-0.3415	-0.3445
347	CHEMBL2159459	Training	5.673	6.4682	0.7952	6.4739	0.8009	0.0072	1.8973	1.911
348	CHEMBL2159460	Training	6.752	6.5718	-0.1802	6.5705	-0.1815	0.0072	-0.43	-0.4331
349	CHEMBL2159461	Training	6.833	6.9392	0.1062	6.9401	0.1071	0.0083	0.2535	0.2556
350	CHEMBL2159462	Training	6.08	6.4654	0.3854	6.4689	0.3889	0.0089	0.9203	0.9286
351	CHEMBL2159463	Prediction	5.422	5.9998	0.5778	-	-	0.009	1.3799	1.3799
352	CHEMBL2159464	Training	6.064	6.6375	0.5735	6.6447	0.5807	0.0124	1.372	1.3893
353	CHEMBL2159465	Training	6.62	6.3128	-0.3072	6.3093	-0.3107	0.0111	-0.7344	-0.7427
354	CHEMBL2159466	Training	6.701	6.2078	-0.4932	6.2024	-0.4986	0.0109	-1.1789	-1.1919
355	CHEMBL2159467	Prediction	5.745	6.2168	0.4718	-	-	0.0067	1.1254	1.1254
356	CHEMBL2159468	Training	5.754	6.1083	0.3543	6.111	0.357	0.0076	0.8455	0.852
357	CHEMBL2159469	Training	5.875	6.3253	0.4503	6.3282	0.4532	0.0064	1.074	1.0809
358	CHEMBL2159470	Training	6.588	6.8041	0.2161	6.8058	0.2178	0.0077	0.5158	0.5198
359	CHEMBL2159471	Training	6.573	7.0274	0.4544	7.0299	0.4569	0.0055	1.0833	1.0893
360	CHEMBL2159472	Training	6.991	6.8027	-0.1883	6.8013	-0.1897	0.0077	-0.4493	-0.4528
361	CHEMBL2159473	Training	5.75	6.5962	0.8462	6.6067	0.8567	0.0122	2.0242	2.0492
362	CHEMBL2159474	Training	7.041	6.7299	-0.3111	6.7268	-0.3142	0.0098	-0.7432	-0.7506
363	CHEMBL2159475	Prediction	6.648	6.6298	-0.0182	-	-	0.0124	-0.0435	-0.0435
364	CHEMBL2159477	Training	6.298	6.723	0.425	6.7253	0.4273	0.0055	1.0132	1.0188
365	CHEMBL2159478	Training	6.447	6.9413	0.4943	6.9445	0.4975	0.0064	1.179	1.1865
366	CHEMBL2159479	Training	6.606	6.5746	-0.0314	6.5744	-0.0316	0.0061	-0.0748	-0.0753
367	CHEMBL2159480	Training	7.018	6.3716	-0.6464	6.3659	-0.6521	0.0088	-1.5435	-1.5572
368	CHEMBL2159481	Prediction	6.485	6.2708	-0.2142	-	-	0.0088	-0.5114	-0.5114
369	CHEMBL2159482	Training	6.022	6.5788	0.5568	6.5821	0.5601	0.0059	1.3277	1.3355
370	CHEMBL2159483	Training	6.288	6.5935	0.3055	6.5953	0.3073	0.0058	0.7285	0.7327
371	CHEMBL2159484	Prediction	6.807	6.1532	-0.6538	-	-	0.0109	-1.5628	-1.5628
372	CHEMBL2159485	Training	6.611	6.7888	0.1778	6.7898	0.1788	0.0054	0.4238	0.4261
373	CHEMBL2159486	Prediction	6.733	6.8125	0.0795	-	-	0.0102	0.19	0.19
374	CHEMBL2159487	Training	6.699	6.7299	0.0309	6.7302	0.0312	0.0098	0.0739	0.0746
375	CHEMBL2159488	Training	6.695	6.9385	0.2435	6.9401	0.2451	0.0064	0.5808	0.5845
376	CHEMBL2159489	Prediction	6.991	6.6859	-0.3051	-	-	0.0056	-0.7273	-0.7273
377	CHEMBL2159490	Training	6.27	7.0477	0.7777	7.052	0.782	0.0055	1.8541	1.8643
378	CHEMBL2159492	Training	6.567	6.7923	0.2253	6.7936	0.2266	0.0056	0.5372	0.5402
379	CHEMBL2163369	Training	7.703	7.9958	0.2928	7.9967	0.2937	0.0029	0.6971	0.6992
380	CHEMBL2163739	Prediction	7.134	7.853	0.719	-	-	0.0025	1.7115	1.7115
381	CHEMBL2163740	Training	7.408	7.9279	0.5199	7.9293	0.5213	0.0026	1.2376	1.2409
382	CHEMBL2165523	Training	8.055	7.7732	-0.2818	7.7724	-0.2826	0.0028	-0.6709	-0.6727
383	CHEMBL2165525	Prediction	7.793	8.0882	0.2952	-	-	0.0038	0.7032	0.7032
384	CHEMBL2165526	Training	7.804	8.0056	0.2016	8.0062	0.2022	0.0029	0.48	0.4814
385	CHEMBL2165527	Training	8.264	8.0595	-0.2045	8.0589	-0.2051	0.0029	-0.4869	-0.4883
386	CHEMBL2165528	Training	8.34	8.2093	-0.1307	8.2088	-0.1312	0.0038	-0.3113	-0.3125
387	CHEMBL2165529	Training	8.1	7.9195	-0.1805	7.919	-0.181	0.0029	-0.4297	-0.4309
388	CHEMBL2165530	Training	7.81	7.8607	0.0507	7.8608	0.0508	0.0025	0.1207	0.121
389	CHEMBL2165531	Training	7.386	7.9545	0.5685	7.9562	0.5702	0.0029	1.3535	1.3575
390	CHEMBL2165532	Training	7.362	7.8789	0.5169	7.8802	0.5182	0.0026	1.2305	1.2336
391	CHEMBL2165533	Training	7.821	8.0399	0.2189	8.0405	0.2195	0.0029	0.5212	0.5227
392	CHEMBL2165535	Prediction	7.484	7.9251	0.4411	-	-	0.0029	1.0502	1.0502
393	CHEMBL2165536	Training	7.614	7.9545	0.3405	7.9555	0.3415	0.0029	0.8107	0.8131
394	CHEMBL2165537	Training	7.604	8.1155	0.5115	8.1174	0.5134	0.0038	1.2183	1.223
395	CHEMBL2165538	Training	8.376	8.0042	-0.3718	8.0031	-0.3729	0.0029	-0.8852	-0.8877
396	CHEMBL2165539	Prediction	8.3	8.0147	-0.2853	-	-	0.0029	-0.6792	-0.6792
397	CHEMBL2165540	Training	8.572	8.2247	-0.3473	8.2234	-0.3486	0.0038	-0.8273	-0.8304
398	CHEMBL2165543	Prediction	7.914	7.832	-0.082	-	-	0.0025	-0.1951	-0.1951
399	CHEMBL2165544	Training	8.431	8.0154	-0.4156	8.0142	-0.4168	0.0029	-0.9895	-0.9923
400	CHEMBL2165545	Training	8.545	7.9909	-0.5541	7.9893	-0.5557	0.0029	-1.3192	-1.323
401	CHEMBL2165546	Training	8.09	7.8621	-0.2279	7.8615	-0.2285	0.0025	-0.5425	-0.5438
402	CHEMBL2165547	Training	8.299	8.0042	-0.2948	8.0034	-0.2956	0.0029	-0.7018	-0.7039
403	CHEMBL2165548	Training	8.367	8.0553	-0.3117	8.0544	-0.3126	0.0029	-0.7421	-0.7443
404	CHEMBL2165549	Prediction	8.039	7.8964	-0.1426	-	-	0.0026	-0.3394	-0.3394
405	CHEMBL2165550	Training	8.33	8.0798	-0.2502	8.079	-0.251	0.003	-0.5957	-0.5975
406	CHEMBL2165551	Training	7.983	7.7998	-0.1832	7.7994	-0.1836	0.0025	-0.436	-0.4371
407	CHEMBL2165552	Training	8.44	7.9657	-0.4743	7.9643	-0.4757	0.0029	-1.1292	-1.1324
408	CHEMBL2165553	Training	8.082	7.9734	-0.1086	7.9731	-0.1089	0.0029	-0.2585	-0.2593
409	CHEMBL2165554	Prediction	7.743	7.9643	0.2213	-	-	0.0029	0.5269	0.5269
410	CHEMBL2165555	Training	7.489	7.9951	0.5061	7.9966	0.5076	0.0029	1.205	1.2085
411	CHEMBL2165556	Training	7.86	8.1939	0.3339	8.1952	0.3352	0.0038	0.7953	0.7983
412	CHEMBL2165557	Training	8.23	8.0483	-0.1817	8.0478	-0.1822	0.0029	-0.4326	-0.4339
413	CHEMBL2165559	Training	7.81	7.9979	0.1879	7.9985	0.1885	0.0029	0.4474	0.4487
414	CHEMBL2165560	Training	7.69	7.8187	0.1287	7.819	0.129	0.0025	0.3064	0.3072
415	CHEMBL2165561	Training	7.538	7.8859	0.3479	7.887	0.349	0.0029	0.8284	0.8308
416	CHEMBL2165562	Training	8.162	8.0308	-0.1312	8.0304	-0.1316	0.0029	-0.3124	-0.3133
417	CHEMBL2165564	Training	7.213	7.7579	0.5449	7.7604	0.5474	0.0047	1.2984	1.3045
418	CHEMBL2165565	Training	7.537	7.746	0.209	7.7466	0.2096	0.0032	0.4976	0.4992
419	CHEMBL2165566	Training	7.766	7.8544	0.0884	7.8546	0.0886	0.0025	0.2105	0.211
420	CHEMBL2165567	Training	7.883	7.9195	0.0365	7.9196	0.0366	0.0026	0.0869	0.0871
421	CHEMBL2172183	Training	7.949	8.2268	0.2778	8.2278	0.2788	0.0038	0.6617	0.6642
422	CHEMBL2172184	Training	7.447	8.1302	0.6832	8.1328	0.6858	0.0038	1.6273	1.6334
423	CHEMBL2172185	Training	8.721	8.6768	-0.0442	8.6765	-0.0445	0.0079	-0.1055	-0.1063
424	CHEMBL2172186	Prediction	8.961	8.6768	-0.2842	-	-	0.0079	-0.6783	-0.6783
425	CHEMBL2172187	Training	9.167	8.6537	-0.5133	8.6496	-0.5174	0.0079	-1.2251	-1.2349
426	CHEMBL2172191	Training	8.678	8.6915	0.0135	8.6916	0.0136	0.0079	0.0322	0.0325
427	CHEMBL2172192	Training	8.121	8.695	0.574	8.6996	0.5786	0.0079	1.37	1.3809
428	CHEMBL2172193	Training	9.18	8.653	-0.527	8.6488	-0.5312	0.0079	-1.2578	-1.2679
429	CHEMBL220566	Training	7.959	7.7705	-0.1885	7.7699	-0.1891	0.0031	-0.4489	-0.4503
430	CHEMBL2207371	Training	8.005	7.7972	-0.2078	7.7957	-0.2093	0.0072	-0.4958	-0.4994
431	CHEMBL2207372	Training	7.954	7.8938	-0.0602	7.8934	-0.0606	0.0072	-0.1437	-0.1447
432	CHEMBL2207373	Training	7.88	7.8133	-0.0667	7.8129	-0.0671	0.0057	-0.1591	-0.16
433	CHEMBL2207374	Training	7.631	7.8945	0.2635	7.8964	0.2654	0.0072	0.6287	0.6332
434	CHEMBL2207375	Training	7.535	7.9337	0.3987	7.9375	0.4025	0.0093	0.9523	0.9613
435	CHEMBL2207376	Training	7.566	8.017	0.451	8.0212	0.4552	0.0092	1.0771	1.0871
436	CHEMBL2207377	Training	7.271	7.9204	0.6494	7.9251	0.6541	0.0072	1.5494	1.5606
437	CHEMBL2207382	Training	7.519	7.8882	0.3692	7.8909	0.3719	0.0072	0.8809	0.8872
438	CHEMBL2207383	Training	7.123	7.8714	0.7484	7.8768	0.7538	0.0072	1.7856	1.7986
439	CHEMBL2207387	Training	8.317	7.9155	-0.4015	7.9131	-0.4039	0.0059	-0.9574	-0.9631
440	CHEMBL2207388	Training	8.489	7.8917	-0.5973	7.8874	-0.6016	0.0072	-1.4251	-1.4354
441	CHEMBL2207389	Training	8.101	7.7699	-0.3311	7.768	-0.333	0.0057	-0.7894	-0.7939
442	CHEMBL2207768	Training	8.067	7.7328	-0.3342	7.7309	-0.3361	0.0057	-0.7968	-0.8013
443	CHEMBL223637	Training	7.824	7.6515	-0.1725	7.651	-0.173	0.0026	-0.4107	-0.4118
444	CHEMBL2260372	Training	7.194	6.8646	-0.3294	6.8629	-0.3311	0.0051	-0.7851	-0.7891
445	CHEMBL2260373	Training	7	6.7561	-0.2439	6.7547	-0.2453	0.0057	-0.5815	-0.5849
446	CHEMBL2260374	Training	7.076	7.874	0.798	7.8764	0.8004	0.0029	1.9	1.9056
447	CHEMBL2260375	Training	7.387	7.6156	0.2286	7.6174	0.2304	0.0078	0.5455	0.5498
448	CHEMBL2260377	Training	6.569	6.7561	0.1871	6.7572	0.1882	0.0057	0.4461	0.4487
449	CHEMBL2312637	Training	6.521	6.3759	-0.1451	6.3749	-0.1461	0.0066	-0.3462	-0.3485
450	CHEMBL2312638	Training	6.223	6.5243	0.3013	6.5261	0.3031	0.0061	0.7184	0.7227
451	CHEMBL2312639	Prediction	6.343	6.518	0.175	-	-	0.0061	0.4172	0.4172
452	CHEMBL2312640	Training	6.658	6.5431	-0.1149	6.5425	-0.1155	0.006	-0.2739	-0.2755
453	CHEMBL2312642	Training	6.487	6.1882	-0.2988	6.1856	-0.3014	0.0088	-0.7134	-0.7198
454	CHEMBL2312934	Training	6.59	6.3794	-0.2106	6.378	-0.212	0.0066	-0.5024	-0.5057
455	CHEMBL2312935	Training	5.876	6.3493	0.4733	6.3524	0.4764	0.0067	1.1289	1.1365
456	CHEMBL2312937	Training	6.315	6.1861	-0.1289	6.185	-0.13	0.0088	-0.3077	-0.3104
457	CHEMBL235070	Training	8.31	8.296	-0.014	8.296	-0.014	0.0035	-0.0332	-0.0334
458	CHEMBL235117	Training	8.409	8.2043	-0.2047	8.2036	-0.2054	0.0036	-0.4874	-0.4892
459	CHEMBL235118	Prediction	8.921	8.527	-0.394	-	-	0.0047	-0.9389	-0.9389
460	CHEMBL235306	Training	8.42	8.1442	-0.2758	8.1432	-0.2768	0.0033	-0.6569	-0.659
461	CHEMBL235734	Training	8.357	7.667	-0.69	7.6601	-0.6969	0.0099	-1.6486	-1.6651
462	CHEMBL235985	Training	7.959	7.8691	-0.0899	7.8689	-0.0901	0.0029	-0.2139	-0.2146
463	CHEMBL235986	Training	8.222	7.6808	-0.5412	7.6794	-0.5426	0.0026	-1.2883	-1.2917
464	CHEMBL235987	Training	7.854	7.7802	-0.0738	7.78	-0.074	0.0025	-0.1756	-0.176
465	CHEMBL236103	Training	9	9.0274	0.0274	9.0276	0.0276	0.0093	0.0654	0.066
466	CHEMBL236104	Training	9.155	9.0491	-0.1059	9.0481	-0.1069	0.0095	-0.253	-0.2555
467	CHEMBL236313	Prediction	8.699	9.1485	0.4495	-	-	0.009	1.0734	1.0734
468	CHEMBL236314	Training	8.77	9.1303	0.3603	9.1335	0.3635	0.0089	0.8603	0.8681
469	CHEMBL236334	Training	8.658	8.3044	-0.3536	8.3032	-0.3548	0.0035	-0.842	-0.845
470	CHEMBL236335	Training	8.824	8.1847	-0.6393	8.1825	-0.6415	0.0035	-1.5224	-1.5277
471	CHEMBL236405	Training	8.367	8.2646	-0.1024	8.2642	-0.1028	0.0034	-0.244	-0.2448
472	CHEMBL236540	Prediction	7.959	7.6502	-0.3088	-	-	0.0092	-0.7375	-0.7375
473	CHEMBL236571	Training	8.027	8.044	0.017	8.0441	0.0171	0.0038	0.0406	0.0408
474	CHEMBL236576	Training	8.071	8.0931	0.0221	8.0931	0.0221	0.0031	0.0525	0.0527
475	CHEMBL236577	Prediction	8.824	8.1959	-0.6281	-	-	0.0035	-1.4958	-1.4958
476	CHEMBL236578	Training	8.252	8.1918	-0.0602	8.1916	-0.0604	0.0032	-0.1434	-0.1439
477	CHEMBL236579	Training	8.301	8.196	-0.105	8.1956	-0.1054	0.0032	-0.2501	-0.2509
478	CHEMBL236772	Training	8.337	8.1763	-0.1607	8.1758	-0.1612	0.0034	-0.3826	-0.3839
479	CHEMBL236812	Prediction	8.721	8.541	-0.18	-	-	0.0048	-0.429	-0.429
480	CHEMBL236976	Training	7.921	8.1742	0.2532	8.1751	0.2541	0.0034	0.6031	0.6051
481	CHEMBL236986	Training	7.328	7.6087	0.2807	7.6095	0.2815	0.0026	0.6683	0.67
482	CHEMBL236988	Training	8.155	7.6228	-0.5322	7.6214	-0.5336	0.0026	-1.267	-1.2703
483	CHEMBL236989	Training	8.222	8.049	-0.173	8.0485	-0.1735	0.0029	-0.412	-0.4132
484	CHEMBL236990	Training	8.155	8.2464	0.0914	8.2467	0.0917	0.0038	0.2177	0.2185
485	CHEMBL237179	Training	7.475	7.7734	0.2984	7.7766	0.3016	0.0105	0.7131	0.7207
486	CHEMBL237389	Training	7.955	8.1938	0.2388	8.1947	0.2397	0.0035	0.5688	0.5708
487	CHEMBL237593	Training	8.119	8.31	0.191	8.3107	0.1917	0.0036	0.455	0.4566
488	CHEMBL237594	Prediction	7.939	8.1966	0.2576	-	-	0.0035	0.6136	0.6136
489	CHEMBL2377443	Training	6.578	5.7808	-0.7972	5.7752	-0.8028	0.007	-1.9019	-1.9154
490	CHEMBL2377445	Training	5.941	5.7808	-0.1602	5.7797	-0.1613	0.007	-0.3822	-0.3849
491	CHEMBL238277	Training	8	7.685	-0.315	7.6842	-0.3158	0.0026	-0.7498	-0.7518
492	CHEMBL238770	Training	8	8.0289	0.0289	8.0292	0.0292	0.0107	0.069	0.0698
493	CHEMBL240922	Prediction	8.699	8.1932	-0.5058	-	-	0.0032	-1.2045	-1.2045
494	CHEMBL2413985	Training	7.614	8.2104	0.5964	8.2131	0.5991	0.0044	1.4211	1.4273
495	CHEMBL2413988	Training	7.521	8.1411	0.6201	8.1436	0.6226	0.004	1.4772	1.4831
496	CHEMBL2413989	Training	8.783	8.2384	-0.5446	8.2359	-0.5471	0.0046	-1.2977	-1.3036
497	CHEMBL2413991	Prediction	8.081	8.1922	0.1112	-	-	0.0043	0.265	0.265
498	CHEMBL2442272	Training	6.13	5.9335	-0.1965	5.9302	-0.1998	0.0166	-0.471	-0.479
499	CHEMBL2442274	Training	5.852	5.825	-0.027	5.8246	-0.0274	0.0163	-0.0646	-0.0657
500	CHEMBL2448158	Training	7.903	7.8922	-0.0108	7.8922	-0.0108	0.0029	-0.0256	-0.0257
501	CHEMBL245806	Training	6.553	7.282	0.729	7.286	0.733	0.0055	1.7378	1.7474
502	CHEMBL246077	Prediction	7.9	7.8892	-0.0108	-	-	0.0023	-0.0256	-0.0256
503	CHEMBL246079	Prediction	8.7	7.8822	-0.8178	-	-	0.0023	-1.9464	-1.9464
504	CHEMBL246080	Prediction	8	7.7871	-0.2129	-	-	0.0023	-0.5068	-0.5068
505	CHEMBL246484	Training	6.2	5.7808	-0.4192	5.7778	-0.4222	0.007	-1.0001	-1.0072
506	CHEMBL246916	Training	8.1	7.8893	-0.2107	7.8887	-0.2113	0.0026	-0.5017	-0.503
507	CHEMBL247071	Training	6.879	7.1901	0.3111	7.1921	0.3131	0.0063	0.742	0.7467
508	CHEMBL247120	Training	7.4	7.689	0.289	7.6901	0.2901	0.0036	0.6883	0.6908
509	CHEMBL247121	Prediction	8.4	7.8634	-0.5366	-	-	0.0026	-1.2775	-1.2775
510	CHEMBL247477	Training	7.886	7.8265	-0.0595	7.8263	-0.0597	0.003	-0.1418	-0.1422
511	CHEMBL247871	Prediction	6.357	7.0657	0.7087	-	-	0.004	1.6882	1.6882
512	CHEMBL247885	Training	7.357	7.0816	-0.2754	7.0801	-0.2769	0.0053	-0.6565	-0.66
513	CHEMBL247886	Training	6.352	7.0816	0.7296	7.0855	0.7335	0.0053	1.7392	1.7486
514	CHEMBL248268	Prediction	6.658	6.9544	0.2964	-	-	0.0042	0.706	0.706
515	CHEMBL251857	Prediction	7.135	6.6456	-0.4894	-	-	0.0105	-1.1696	-1.1696
516	CHEMBL251861	Training	6.146	6.5371	0.3911	6.5409	0.3949	0.0095	0.9343	0.9432
517	CHEMBL252496	Prediction	6.057	6.5371	0.4801	-	-	0.0095	1.1468	1.1468
518	CHEMBL252673	Training	6.706	6.7541	0.0481	6.7547	0.0487	0.0122	0.1151	0.1165
519	CHEMBL252774	Training	7.046	7.4079	0.3619	7.409	0.363	0.0031	0.8616	0.8643
520	CHEMBL252902	Training	6.461	6.6456	0.1846	6.6476	0.1866	0.0105	0.4412	0.4459
521	CHEMBL253061	Prediction	6.021	6.6456	0.6246	-	-	0.0105	1.4928	1.4928
522	CHEMBL253095	Training	7.548	7.1901	-0.3579	7.1878	-0.3602	0.0063	-0.8535	-0.859
523	CHEMBL253397	Training	7.046	7.9368	0.8908	7.9395	0.8935	0.003	2.1209	2.1274
524	CHEMBL253502	Training	6.833	6.6456	-0.1874	6.6436	-0.1894	0.0105	-0.4478	-0.4526
525	CHEMBL253709	Training	6.807	6.4286	-0.3784	6.4252	-0.3818	0.0089	-0.9036	-0.9118
526	CHEMBL253718	Prediction	7.111	6.3201	-0.7909	-	-	0.0089	-1.8887	-1.8887
527	CHEMBL253826	Training	7.31	7.3911	0.0811	7.3913	0.0813	0.0031	0.193	0.1936
528	CHEMBL254298	Training	7.262	6.6456	-0.6164	6.639	-0.623	0.0105	-1.4732	-1.4889
529	CHEMBL254330	Training	6.533	6.4286	-0.1044	6.4277	-0.1053	0.0089	-0.2493	-0.2515
530	CHEMBL254331	Training	6.049	6.6456	0.5966	6.652	0.603	0.0105	1.4259	1.4411
531	CHEMBL26655	Prediction	7.009	6.8646	-0.1444	-	-	0.0051	-0.3441	-0.3441
532	CHEMBL298274	Prediction	8.77	8.067	-0.703	-	-	0.0036	-1.6744	-1.6744
533	CHEMBL299569	Training	8.31	7.8948	-0.4152	7.8929	-0.4171	0.0044	-0.9893	-0.9937
534	CHEMBL30713	Prediction	6.041	6.7561	0.7151	-	-	0.0057	1.705	1.705
535	CHEMBL318018	Training	9	8.1979	-0.8021	8.1954	-0.8046	0.0031	-1.9099	-1.9158
536	CHEMBL3216123	Training	7.97	7.9834	0.0134	7.9835	0.0135	0.0092	0.032	0.0323
537	CHEMBL3216565	Training	8.106	7.7811	-0.3249	7.7792	-0.3268	0.0057	-0.7746	-0.7791
538	CHEMBL3220215	Training	6.67	5.8893	-0.7807	5.8835	-0.7865	0.0074	-1.8629	-1.8767
539	CHEMBL3220219	Training	6.45	6.2539	-0.1961	6.2527	-0.1973	0.0061	-0.4677	-0.4706
540	CHEMBL3233402	Training	5.513	5.0687	-0.4443	5.0605	-0.4525	0.0182	-1.0659	-1.0857
541	CHEMBL3233665	Prediction	5.018	5.1772	0.1592	-	-	0.0178	0.382	0.382
542	CHEMBL3233666	Training	4.593	4.9602	0.3672	4.9674	0.3744	0.0192	0.8815	0.8988
543	CHEMBL3233667	Training	4.834	4.8517	0.0177	4.8521	0.0181	0.0207	0.0426	0.0435
544	CHEMBL3233668	Training	5.36	5.7808	0.4208	5.7838	0.4238	0.007	1.004	1.0111
545	CHEMBL3233669	Training	5.065	5.7808	0.7158	5.7859	0.7209	0.007	1.7078	1.7199
546	CHEMBL3233670	Training	5.534	5.5638	0.0298	5.564	0.03	0.008	0.0712	0.0717
547	CHEMBL3233671	Training	5.601	5.7808	0.1798	5.7821	0.1811	0.007	0.429	0.432
548	CHEMBL3233672	Training	5.711	5.7808	0.0698	5.7813	0.0703	0.007	0.1666	0.1677
549	CHEMBL3233673	Prediction	5.127	5.6723	0.5453	-	-	0.0072	1.3011	1.3011
550	CHEMBL3233675	Training	5.754	5.7808	0.0268	5.781	0.027	0.007	0.064	0.0644
551	CHEMBL3235744	Training	6.55	6.0999	-0.4501	6.0966	-0.4534	0.0073	-1.074	-1.082
552	CHEMBL3260785	Training	7.268	6.6346	-0.6334	6.6297	-0.6383	0.0076	-1.5116	-1.5232
553	CHEMBL3260786	Prediction	7	6.6346	-0.3654	-	-	0.0076	-0.8721	-0.8721
554	CHEMBL3260787	Training	6.187	6.5391	0.3521	6.5422	0.3552	0.0088	0.8408	0.8482
555	CHEMBL3260788	Prediction	5.921	6.6346	0.7136	-	-	0.0076	1.7029	1.7029
556	CHEMBL3260789	Training	6.854	6.6346	-0.2194	6.6329	-0.2211	0.0076	-0.5236	-0.5276
557	CHEMBL3260790	Training	7.155	6.9731	-0.1819	6.9722	-0.1828	0.0049	-0.4335	-0.4356
558	CHEMBL3260791	Training	7.076	6.9731	-0.1029	6.9726	-0.1034	0.0049	-0.2452	-0.2464
559	CHEMBL3260792	Training	7.319	6.9731	-0.3459	6.9714	-0.3476	0.0049	-0.8243	-0.8284
560	CHEMBL3260796	Prediction	7.26	6.9731	-0.2869	-	-	0.0049	-0.6837	-0.6837
561	CHEMBL3260801	Training	7.328	6.8646	-0.4634	6.8623	-0.4657	0.0051	-1.1044	-1.1101
562	CHEMBL3260802	Training	7.06	6.9731	-0.0869	6.9727	-0.0873	0.0049	-0.2071	-0.2081
563	CHEMBL3260804	Training	6.62	6.8646	0.2446	6.8659	0.2459	0.0051	0.583	0.586
564	CHEMBL3260805	Training	6.854	6.9731	0.1191	6.9737	0.1197	0.0049	0.2839	0.2853
565	CHEMBL3260807	Training	6.824	6.7561	-0.0679	6.7557	-0.0683	0.0057	-0.1619	-0.1628
566	CHEMBL3260808	Training	6.481	6.9731	0.4921	6.9755	0.4945	0.0049	1.1728	1.1786
567	CHEMBL3286399	Training	7.679	7.2369	-0.4421	7.2295	-0.4495	0.0163	-1.0598	-1.0774
568	CHEMBL3286432	Training	7.276	6.9434	-0.3326	6.9413	-0.3347	0.0064	-0.7932	-0.7983
569	CHEMBL3286581	Training	8.048	7.2614	-0.7866	7.2483	-0.7997	0.0164	-1.8856	-1.9169
570	CHEMBL3286582	Training	7.62	7.2376	-0.3824	7.2312	-0.3888	0.0163	-0.9167	-0.9319
571	CHEMBL3286583	Training	7.019	7.1312	0.1122	7.133	0.114	0.0161	0.2688	0.2732
572	CHEMBL3286586	Training	7.539	7.0507	-0.4883	7.0427	-0.4963	0.016	-1.1703	-1.1893
573	CHEMBL3286588	Training	7.329	7.1361	-0.1929	7.1329	-0.1961	0.0163	-0.4624	-0.4701
574	CHEMBL3286589	Training	6.738	7.2719	0.5339	7.2807	0.5427	0.0164	1.2797	1.301
575	CHEMBL3286590	Prediction	7.588	7.0759	-0.5121	-	-	0.016	-1.2274	-1.2274
576	CHEMBL3286591	Training	7.62	7.19	-0.43	7.1828	-0.4372	0.0163	-1.0308	-1.0479
577	CHEMBL3286592	Prediction	6.772	7.1949	0.4229	-	-	0.0163	1.0136	1.0136
578	CHEMBL3289708	Training	6.367	6.795	0.428	6.7994	0.4324	0.0101	1.0227	1.0332
579	CHEMBL3289944	Training	7	7.1093	0.1093	7.1099	0.1099	0.0056	0.2606	0.2621
580	CHEMBL3289946	Training	7.149	7.0925	-0.0565	7.0921	-0.0569	0.0069	-0.1348	-0.1357
581	CHEMBL3289950	Training	6.854	7.3424	0.4884	7.3456	0.4916	0.0065	1.1648	1.1725
582	CHEMBL3289951	Training	7.377	7.2437	-0.1333	7.2426	-0.1344	0.0078	-0.3182	-0.3207
583	CHEMBL3289953	Training	7.398	6.8678	-0.5302	6.8636	-0.5344	0.0079	-1.2655	-1.2756
584	CHEMBL3289957	Training	7.201	7.3227	0.1217	7.3238	0.1228	0.0083	0.2906	0.2931
585	CHEMBL3289958	Prediction	7.481	7.4242	-0.0568	-	-	0.007	-0.1354	-0.1354
586	CHEMBL3289963	Training	7.076	7.511	0.435	7.5143	0.4383	0.0076	1.0382	1.0461
587	CHEMBL3289964	Prediction	6.854	7.3892	0.5352	-	-	0.0088	1.2781	1.2781
588	CHEMBL3289965	Training	7.569	7.0687	-0.5003	7.0641	-0.5049	0.009	-1.1949	-1.2057
589	CHEMBL3289966	Prediction	6.921	7.0694	0.1484	-	-	0.009	0.3543	0.3543
590	CHEMBL3289967	Prediction	5.824	6.4514	0.6274	-	-	0.0063	1.4964	1.4964
591	CHEMBL3289968	Training	7.06	6.4542	-0.6058	6.4504	-0.6096	0.0063	-1.4447	-1.4539
592	CHEMBL3289969	Training	5.959	6.5116	0.5526	6.5151	0.5561	0.0062	1.3179	1.3261
593	CHEMBL3289971	Training	6.481	6.6083	0.1273	6.6091	0.1281	0.0064	0.3035	0.3055
594	CHEMBL3289981	Training	7.456	6.7727	-0.6833	6.7685	-0.6875	0.0061	-1.6295	-1.6394
595	CHEMBL3289982	Training	5.959	6.6628	0.7038	6.668	0.709	0.0073	1.6793	1.6916
596	CHEMBL3289983	Training	6.252	6.8945	0.6425	6.8979	0.6459	0.0053	1.5315	1.5397
597	CHEMBL3289987	Training	7.022	6.9505	-0.0715	6.9501	-0.0719	0.0054	-0.1706	-0.1715
598	CHEMBL3289990	Training	6.678	6.2393	-0.4387	6.2354	-0.4426	0.0088	-1.0475	-1.0568
599	CHEMBL3289992	Training	6.854	6.6719	-0.1821	6.6708	-0.1832	0.0061	-0.4341	-0.4368
600	CHEMBL3289996	Prediction	7.319	6.5005	-0.8185	-	-	0.0062	-1.952	-1.952
601	CHEMBL3289999	Training	7.18	6.5956	-0.5844	6.5913	-0.5887	0.0072	-1.3944	-1.4046
602	CHEMBL3290000	Training	6.886	7.0226	0.1366	7.0234	0.1374	0.0057	0.3257	0.3276
603	CHEMBL3290001	Training	6.602	6.5487	-0.0533	6.5484	-0.0536	0.0061	-0.1271	-0.1278
604	CHEMBL3290002	Training	7.081	6.5592	-0.5218	6.556	-0.525	0.0061	-1.2443	-1.2519
605	CHEMBL3290004	Training	6.876	6.5347	-0.3413	6.5327	-0.3433	0.006	-0.8137	-0.8187
606	CHEMBL3290011	Training	7.398	6.6642	-0.7338	6.6588	-0.7392	0.0073	-1.751	-1.7639
607	CHEMBL3290018	Training	7	6.984	-0.016	6.984	-0.016	0.0054	-0.038	-0.0382
608	CHEMBL3290019	Prediction	7	6.8399	-0.1601	-	-	0.0061	-0.3819	-0.3819
609	CHEMBL3290021	Training	7.155	6.8441	-0.3109	6.8424	-0.3126	0.0054	-0.7411	-0.7452
610	CHEMBL3329427	Training	7.004	6.8516	-0.1524	6.8501	-0.1539	0.0098	-0.3642	-0.3678
611	CHEMBL3329428	Prediction	6.928	6.7431	-0.1849	-	-	0.0084	-0.4415	-0.4415
612	CHEMBL3329431	Training	7.699	7.8852	0.1862	7.8874	0.1884	0.012	0.4453	0.4507
613	CHEMBL3329433	Training	7.959	8.1454	0.1864	8.1459	0.1869	0.0028	0.4437	0.445
614	CHEMBL3329434	Prediction	8.921	8.368	-0.553	-	-	0.0033	-1.3169	-1.3169
615	CHEMBL3329437	Training	8.244	7.6788	-0.5652	7.676	-0.568	0.005	-1.3471	-1.3539
616	CHEMBL3329443	Training	8.42	8.4806	0.0606	8.4808	0.0608	0.0037	0.1444	0.1449
617	CHEMBL3329444	Training	7.229	7.6407	0.4117	7.6445	0.4155	0.0092	0.9834	0.9925
618	CHEMBL3329445	Training	8.398	7.8625	-0.5355	7.8541	-0.5439	0.0156	-1.283	-1.3034
619	CHEMBL3329455	Training	7.854	7.3006	-0.5534	7.292	-0.562	0.0153	-1.3258	-1.3464
620	CHEMBL3331585	Prediction	8.796	8.2398	-0.5562	-	-	0.0032	-1.3243	-1.3243
621	CHEMBL3360992	Training	4.917	5.5638	0.6468	5.569	0.652	0.008	1.5439	1.5563
622	CHEMBL3360994	Training	4.847	5.4553	0.6083	5.461	0.614	0.0093	1.4529	1.4665
623	CHEMBL3360995	Training	5.706	5.4553	-0.2507	5.453	-0.253	0.0093	-0.5988	-0.6044
624	CHEMBL3360996	Prediction	5.288	5.4553	0.1673	-	-	0.0093	0.3996	0.3996
625	CHEMBL3360998	Training	5.721	5.7808	0.0598	5.7812	0.0602	0.007	0.1427	0.1437
626	CHEMBL3361000	Training	5.046	5.7938	0.7478	5.8024	0.7564	0.0113	1.788	1.8085
627	CHEMBL3361001	Prediction	5.923	5.7938	-0.1292	-	-	0.0113	-0.3088	-0.3088
628	CHEMBL3409035	Training	6.226	5.4553	-0.7707	5.4481	-0.7779	0.0093	-1.8408	-1.858
629	CHEMBL3409037	Training	6.22	5.5638	-0.6562	5.5585	-0.6615	0.008	-1.5663	-1.5788
630	CHEMBL3409247	Training	6.167	6.2006	0.0336	6.2009	0.0339	0.0096	0.0802	0.0809
631	CHEMBL3409248	Training	7.208	7.1299	-0.0781	7.129	-0.079	0.0115	-0.1867	-0.1889
632	CHEMBL3409261	Prediction	7.796	7.2587	-0.5373	-	-	0.0097	-1.2836	-1.2836
633	CHEMBL3410504	Prediction	7	7.298	0.298	-	-	0.0032	0.7096	0.7096
634	CHEMBL3423334	Prediction	5.798	6.1194	0.3214	-	-	0.0078	0.767	0.767
635	CHEMBL3423335	Training	5.837	5.2988	-0.5382	5.2872	-0.5498	0.0211	-1.2933	-1.3212
636	CHEMBL3423336	Training	6.077	5.5158	-0.5612	5.505	-0.572	0.0188	-1.347	-1.3728
637	CHEMBL3423339	Training	6.292	5.5158	-0.7762	5.5009	-0.7911	0.0188	-1.863	-1.8987
638	CHEMBL354417	Prediction	6.905	7.1754	0.2704	-	-	0.0118	0.6467	0.6467
639	CHEMBL359460	Training	7.745	7.8062	0.0612	7.8063	0.0613	0.003	0.1456	0.1461
640	CHEMBL359604	Training	6.928	6.7431	-0.1849	6.7415	-0.1865	0.0084	-0.4415	-0.4453
641	CHEMBL359967	Training	7.337	8.2911	0.9541	8.2945	0.9575	0.0035	2.2723	2.2803
642	CHEMBL360181	Prediction	7.81	8.1609	0.3509	-	-	0.0034	0.8357	0.8357
643	CHEMBL360234	Training	8.523	7.8138	-0.7092	7.812	-0.711	0.0025	-1.6881	-1.6923
644	CHEMBL360642	Training	7.357	8.0455	0.6885	8.0475	0.6905	0.0029	1.6391	1.644
645	CHEMBL361230	Prediction	8.328	7.9025	-0.4255	-	-	0.0029	-1.0131	-1.0131
646	CHEMBL361572	Training	8.523	7.8069	-0.7161	7.8047	-0.7183	0.003	-1.7051	-1.7103
647	CHEMBL362177	Training	7.509	7.9552	0.4462	7.9564	0.4474	0.0027	1.0622	1.0651
648	CHEMBL362220	Training	7.699	7.7326	0.0336	7.7327	0.0337	0.0025	0.0801	0.0803
649	CHEMBL362628	Training	8.658	8.3959	-0.2621	8.3943	-0.2637	0.0058	-0.625	-0.6286
650	CHEMBL362921	Training	7.644	8.1659	0.5219	8.1675	0.5235	0.0031	1.2426	1.2465
651	CHEMBL363275	Training	7.994	7.7823	-0.2117	7.7818	-0.2122	0.0025	-0.5038	-0.5051
652	CHEMBL363827	Training	8.036	7.7971	-0.2389	7.7963	-0.2397	0.003	-0.5689	-0.5707
653	CHEMBL363843	Training	8.155	7.4737	-0.6813	7.4719	-0.6831	0.0026	-1.6219	-1.6262
654	CHEMBL364248	Training	5.597	6.3201	0.7231	6.3266	0.7296	0.0089	1.7268	1.7424
655	CHEMBL365471	Training	7.538	7.7191	0.1811	7.7207	0.1827	0.0084	0.4325	0.4361
656	CHEMBL365993	Prediction	7.481	7.8775	0.3965	-	-	0.0029	0.9441	0.9441
657	CHEMBL366151	Training	7.917	8.189	0.272	8.1898	0.2728	0.0032	0.6476	0.6497
658	CHEMBL366248	Training	7.6	7.8959	0.2959	7.9018	0.3018	0.0196	0.7105	0.7247
659	CHEMBL366515	Training	6.818	6.9753	0.1573	6.9765	0.1585	0.0077	0.3754	0.3783
660	CHEMBL367088	Training	8.009	7.9915	-0.0175	7.9913	-0.0177	0.0128	-0.0418	-0.0423
661	CHEMBL367305	Training	7.503	7.8641	0.3611	7.8687	0.3657	0.0124	0.8639	0.8748
662	CHEMBL367730	Training	7.614	8.0957	0.4817	8.0975	0.4835	0.0037	1.1472	1.1515
663	CHEMBL367832	Training	7.282	8.0293	0.7473	8.0393	0.7573	0.0132	1.7885	1.8124
664	CHEMBL368058	Training	6.879	7.2462	0.3672	7.2492	0.3702	0.0082	0.8765	0.8838
665	CHEMBL368069	Training	7.128	7.3076	0.1796	7.3082	0.1802	0.0033	0.4277	0.4291
666	CHEMBL368557	Training	6.78	6.8927	0.1127	6.8939	0.1139	0.0104	0.2693	0.2721
667	CHEMBL368871	Prediction	7.385	7.7198	0.3348	-	-	0.0037	0.7974	0.7974
668	CHEMBL368959	Training	7.674	7.8493	0.1753	7.8497	0.1757	0.0023	0.4173	0.4183
669	CHEMBL370215	Training	8.301	7.6619	-0.6391	7.6603	-0.6407	0.0026	-1.5213	-1.5253
670	CHEMBL370306	Training	7.585	7.5948	0.0098	7.5948	0.0098	0.0027	0.0233	0.0233
671	CHEMBL370508	Training	7.469	7.7788	0.3098	7.7796	0.3106	0.0025	0.7375	0.7394
672	CHEMBL370719	Training	7.699	7.9349	0.2359	7.9356	0.2366	0.0029	0.5617	0.5633
673	CHEMBL371132	Prediction	8.071	7.788	-0.283	-	-	0.0031	-0.6739	-0.6739
674	CHEMBL371176	Training	9	8.235	-0.765	8.2329	-0.7671	0.0028	-1.8213	-1.8263
675	CHEMBL371318	Training	8.523	8.154	-0.369	8.1528	-0.3702	0.0031	-0.8787	-0.8814
676	CHEMBL371469	Training	8.155	7.8838	-0.2712	7.883	-0.272	0.0029	-0.6456	-0.6475
677	CHEMBL371876	Training	8.7	8.2196	-0.4804	8.2183	-0.4817	0.0027	-1.1437	-1.1468
678	CHEMBL371886	Training	8.097	7.6193	-0.4777	7.618	-0.479	0.0026	-1.1372	-1.1402
679	CHEMBL372109	Training	8	7.5323	-0.4677	7.5283	-0.4717	0.0085	-1.1167	-1.1263
680	CHEMBL372287	Prediction	8.2	8.2448	0.0448	-	-	0.0028	0.1066	0.1066
681	CHEMBL372537	Training	9.301	8.8095	-0.4915	8.8066	-0.4944	0.006	-1.1719	-1.179
682	CHEMBL372569	Training	8.009	8.1183	0.1093	8.1186	0.1096	0.003	0.2602	0.261
683	CHEMBL372853	Training	8.721	8.7067	-0.0143	8.7065	-0.0145	0.0113	-0.0343	-0.0347
684	CHEMBL3739680	Training	6.633	6.8826	0.2496	6.8839	0.2509	0.0053	0.5949	0.5981
685	CHEMBL3739745	Prediction	6.193	6.492	0.299	-	-	0.009	0.714	0.714
686	CHEMBL3740054	Training	6.327	6.2015	-0.1255	6.1997	-0.1273	0.0139	-0.3005	-0.3047
687	CHEMBL3740055	Training	6.559	6.5186	-0.0404	6.5182	-0.0408	0.009	-0.0966	-0.0974
688	CHEMBL3740235	Training	6.489	6.212	-0.277	6.209	-0.28	0.0109	-0.6621	-0.6694
689	CHEMBL3742076	Training	6.62	6.4255	-0.1945	6.4238	-0.1962	0.0089	-0.4645	-0.4686
690	CHEMBL375594	Training	6.845	7.6165	0.7715	7.6185	0.7735	0.0026	1.8365	1.8413
691	CHEMBL3758591	Training	6.551	6.1924	-0.3586	6.1874	-0.3636	0.0138	-0.8585	-0.8706
692	CHEMBL3759205	Prediction	6.253	7.1134	0.8604	-	-	0.0157	2.0616	2.0616
693	CHEMBL3759617	Training	6.268	6.9965	0.7285	7.0098	0.7418	0.0179	1.7475	1.7795
694	CHEMBL3785100	Training	8.319	7.9438	-0.3752	7.9429	-0.3761	0.0025	-0.893	-0.8953
695	CHEMBL3785231	Training	7.848	8.312	0.464	8.3171	0.4691	0.011	1.1091	1.1214
696	CHEMBL3785259	Prediction	7.733	7.5449	-0.1881	-	-	0.0025	-0.4478	-0.4478
697	CHEMBL3785278	Training	7.013	7.6478	0.6348	7.6493	0.6363	0.0024	1.5109	1.5146
698	CHEMBL3785431	Prediction	7.836	7.6688	-0.1672	-	-	0.0024	-0.398	-0.398
699	CHEMBL3785512	Training	8.215	7.4511	-0.7639	7.4486	-0.7664	0.0032	-1.8191	-1.8249
700	CHEMBL3785626	Prediction	8.143	7.7626	-0.3804	-	-	0.0023	-0.9055	-0.9055
701	CHEMBL3785864	Prediction	7.686	7.7654	0.0794	-	-	0.0023	0.1889	0.1889
702	CHEMBL3786087	Prediction	7.544	7.8949	0.3509	-	-	0.0026	0.8352	0.8352
703	CHEMBL378656	Training	7.77	7.5731	-0.1969	7.5725	-0.1975	0.0026	-0.4688	-0.47
704	CHEMBL3786693	Training	8.149	7.8767	-0.2723	7.8759	-0.2731	0.0026	-0.6483	-0.65
705	CHEMBL3786703	Training	7.323	7.6583	0.3353	7.6591	0.3361	0.0024	0.798	0.8
706	CHEMBL3786973	Training	8	7.7647	-0.2353	7.7641	-0.2359	0.0023	-0.5601	-0.5614
707	CHEMBL3787014	Training	8.06	7.7626	-0.2974	7.7619	-0.2981	0.0023	-0.7079	-0.7096
708	CHEMBL3787201	Prediction	8.237	7.554	-0.683	-	-	0.0025	-1.6259	-1.6259
709	CHEMBL3787246	Prediction	7.5	7.6268	0.1268	-	-	0.0025	0.3017	0.3017
710	CHEMBL378892	Training	7.824	7.7704	-0.0536	7.7703	-0.0537	0.0025	-0.1275	-0.1278
711	CHEMBL3797293	Training	7.444	7.3798	-0.0642	7.3795	-0.0645	0.0048	-0.1531	-0.1538
712	CHEMBL3797435	Training	8.155	7.3938	-0.7612	7.3902	-0.7648	0.0047	-1.814	-1.8224
713	CHEMBL3797717	Training	8.398	7.3959	-1.0021	7.3912	-1.0068	0.0046	-2.388	-2.3991
714	CHEMBL3798478	Training	8.301	7.3868	-0.9142	7.3824	-0.9186	0.0047	-2.1786	-2.1889
715	CHEMBL3798490	Training	8.097	7.3903	-0.7067	7.3869	-0.7101	0.0047	-1.6841	-1.692
716	CHEMBL3798840	Training	7.319	7.3896	0.0706	7.3899	0.0709	0.0047	0.1682	0.169
717	CHEMBL3798953	Training	7.959	7.3924	-0.5666	7.3897	-0.5693	0.0047	-1.3502	-1.3566
718	CHEMBL3799120	Training	8.222	7.4036	-0.8184	7.3998	-0.8222	0.0046	-1.9502	-1.9592
719	CHEMBL3799529	Training	8.523	7.4078	-1.1152	7.4027	-1.1203	0.0046	-2.6574	-2.6696
720	CHEMBL3799547	Training	7.62	7.4113	-0.2087	7.4103	-0.2097	0.0045	-0.4974	-0.4996
721	CHEMBL3799638	Training	7.796	7.1852	-0.6108	7.1829	-0.6131	0.0036	-1.4548	-1.4601
722	CHEMBL3800153	Training	7.268	7.3966	0.1286	7.3972	0.1292	0.0046	0.3064	0.3078
723	CHEMBL3800251	Training	7.921	7.99	0.069	7.9902	0.0692	0.0025	0.1643	0.1647
724	CHEMBL3800539	Prediction	7.658	7.3735	-0.2845	-	-	0.0048	-0.6781	-0.6781
725	CHEMBL3800576	Training	7.06	7.3574	0.2974	7.3588	0.2988	0.0049	0.7087	0.7122
726	CHEMBL380777	Training	7.237	7.6221	0.3851	7.6235	0.3865	0.0035	0.9171	0.9204
727	CHEMBL381415	Training	7.678	8.0691	0.3911	8.0705	0.3925	0.0036	0.9314	0.9347
728	CHEMBL381871	Training	7.35	7.7599	0.4099	7.761	0.411	0.0025	0.9758	0.9782
729	CHEMBL381887	Training	7.699	8.0364	0.3374	8.0374	0.3384	0.0029	0.8032	0.8056
730	CHEMBL382297	Training	7.319	7.8257	0.5067	7.827	0.508	0.0025	1.2062	1.2092
731	CHEMBL383354	Training	8.155	8.1706	0.0156	8.1706	0.0156	0.0029	0.0371	0.0372
732	CHEMBL38409	Prediction	6.796	6.5658	-0.2302	-	-	0.0091	-0.5497	-0.5497
733	CHEMBL385330	Training	7.854	7.3563	-0.4977	7.3517	-0.5023	0.0092	-1.1887	-1.1997
734	CHEMBL3883443	Training	7.824	7.806	-0.018	7.8058	-0.0182	0.0122	-0.043	-0.0435
735	CHEMBL3884154	Training	7.796	7.4595	-0.3365	7.4536	-0.3424	0.0172	-0.8069	-0.821
736	CHEMBL3885452	Training	7.921	7.8053	-0.1157	7.8039	-0.1171	0.0122	-0.2767	-0.2801
737	CHEMBL3895173	Training	8.1	7.8761	-0.2239	7.8755	-0.2245	0.0029	-0.533	-0.5345
738	CHEMBL39	Training	7.373	6.9731	-0.3999	6.9711	-0.4019	0.0049	-0.953	-0.9578
739	CHEMBL3904094	Training	5.787	6.4338	0.6468	6.4381	0.6511	0.0066	1.5429	1.5532
740	CHEMBL3908917	Training	7.6	7.8474	0.2474	7.8482	0.2482	0.003	0.5891	0.5909
741	CHEMBL3910287	Training	7.1	7.5464	0.4464	7.5479	0.4479	0.0033	1.0631	1.0665
742	CHEMBL3914155	Training	6.83	6.4338	-0.3962	6.4312	-0.3988	0.0066	-0.945	-0.9513
743	CHEMBL391517	Prediction	8.215	8.1056	-0.1094	-	-	0.0041	-0.2605	-0.2605
744	CHEMBL3916787	Training	7.4	7.8719	0.4719	7.8733	0.4733	0.0029	1.1236	1.1269
745	CHEMBL391713	Training	7.87	7.6775	-0.1925	7.6757	-0.1943	0.0094	-0.4598	-0.4642
746	CHEMBL3922670	Training	5.79	6.4338	0.6438	6.4381	0.6481	0.0066	1.5357	1.546
747	CHEMBL3923145	Prediction	5.599	6.3253	0.7263	-	-	0.0064	1.7323	1.7323
748	CHEMBL392318	Training	9.097	9.0267	-0.0703	9.026	-0.071	0.0093	-0.168	-0.1696
749	CHEMBL392541	Training	8.854	8.5355	-0.3185	8.5324	-0.3216	0.0096	-0.7608	-0.7681
750	CHEMBL392746	Training	9.155	8.518	-0.637	8.512	-0.643	0.0094	-1.5215	-1.5359
751	CHEMBL392760	Training	8.699	8.3506	-0.3484	8.3491	-0.3499	0.0044	-0.8301	-0.8338
752	CHEMBL392844	Training	7.796	7.881	0.085	7.8813	0.0853	0.0029	0.2025	0.2031
753	CHEMBL392899	Training	8.62	8.2023	-0.4177	8.2009	-0.4191	0.0032	-0.9947	-0.9979
754	CHEMBL392976	Training	8.495	8.0008	-0.4942	7.9948	-0.5002	0.012	-1.1819	-1.1963
755	CHEMBL393106	Prediction	8.328	8.0854	-0.2426	-	-	0.0031	-0.5777	-0.5777
756	CHEMBL393107	Training	8.469	8.1974	-0.2716	8.1965	-0.2725	0.0032	-0.6468	-0.6489
757	CHEMBL393312	Training	8.854	8.1946	-0.6594	8.1925	-0.6615	0.0032	-1.5702	-1.5753
758	CHEMBL393830	Training	8.432	8.3121	-0.1199	8.3117	-0.1203	0.0036	-0.2855	-0.2865
759	CHEMBL393997	Training	8.886	8.1945	-0.6915	8.1921	-0.6939	0.0035	-1.6467	-1.6525
760	CHEMBL394231	Training	8.377	8.191	-0.186	8.1904	-0.1866	0.0035	-0.4429	-0.4444
761	CHEMBL394232	Prediction	8.081	7.6628	-0.4182	-	-	0.0099	-0.9991	-0.9991
762	CHEMBL394302	Prediction	7.678	7.6837	0.0057	-	-	0.0025	0.0135	0.0135
763	CHEMBL394303	Training	8.097	7.7662	-0.3308	7.7654	-0.3316	0.0025	-0.7873	-0.7893
764	CHEMBL3944687	Training	7.9	7.8684	-0.0316	7.8683	-0.0317	0.0029	-0.0751	-0.0754
765	CHEMBL394689	Training	8.6	7.8647	-0.7353	7.8631	-0.7369	0.0023	-1.75	-1.754
766	CHEMBL3947670	Training	5.551	6.3253	0.7743	6.3303	0.7793	0.0064	1.8468	1.8586
767	CHEMBL394949	Prediction	8.4	7.9928	-0.4072	-	-	0.0025	-0.9692	-0.9692
768	CHEMBL395145	Prediction	7.523	7.9286	0.4056	-	-	0.0029	0.9657	0.9657
769	CHEMBL395465	Training	7.538	7.0816	-0.4564	7.0792	-0.4588	0.0053	-1.0879	-1.0938
770	CHEMBL3959964	Training	8	7.769	-0.231	7.7685	-0.2315	0.0025	-0.5498	-0.5511
771	CHEMBL396329	Training	7.027	7.7963	0.7693	7.7983	0.7713	0.0025	1.8313	1.8359
772	CHEMBL3971039	Prediction	6.9	7.7774	0.8774	-	-	0.0025	2.0886	2.0886
773	CHEMBL397380	Training	6.87	7.1707	0.3007	7.172	0.302	0.0045	0.7164	0.7197
774	CHEMBL398035	Training	8.5	7.9025	-0.5975	7.9011	-0.5989	0.0023	-1.4221	-1.4253
775	CHEMBL398808	Prediction	8.26	8.3093	0.0493	-	-	0.0036	0.1175	0.1175
776	CHEMBL399013	Training	8.602	8.2834	-0.3186	8.2823	-0.3197	0.0035	-0.7586	-0.7613
777	CHEMBL400608	Training	8.244	8.2121	-0.0319	8.212	-0.032	0.0032	-0.0761	-0.0763
778	CHEMBL400627	Training	8.569	8.2065	-0.3625	8.2053	-0.3637	0.0032	-0.8633	-0.8661
779	CHEMBL401018	Training	8.678	8.1609	-0.5171	8.1592	-0.5188	0.0034	-1.2313	-1.2354
780	CHEMBL401019	Training	8.699	8.203	-0.496	8.2014	-0.4976	0.0032	-1.1812	-1.185
781	CHEMBL401969	Training	6.59	7.1901	0.6001	7.1939	0.6039	0.0063	1.4312	1.4403
782	CHEMBL402810	Training	6.463	6.5371	0.0741	6.5378	0.0748	0.0095	0.177	0.1787
783	CHEMBL403843	Training	6.517	6.6456	0.1286	6.647	0.13	0.0105	0.3074	0.3107
784	CHEMBL404421	Training	6.658	6.8646	0.2066	6.8657	0.2077	0.0051	0.4924	0.4949
785	CHEMBL404552	Training	6.138	6.6456	0.5076	6.651	0.513	0.0105	1.2132	1.2261
786	CHEMBL4059662	Training	7.532	7.8301	0.2981	7.8323	0.3003	0.0072	0.7113	0.7164
787	CHEMBL4059916	Training	7.194	7.0816	-0.1124	7.081	-0.113	0.0053	-0.2679	-0.2693
788	CHEMBL4060415	Prediction	7.757	7.681	-0.076	-	-	0.0057	-0.1812	-0.1812
789	CHEMBL4060649	Training	7.222	6.6684	-0.5536	6.6651	-0.5569	0.0061	-1.32	-1.3281
790	CHEMBL4062687	Training	8.222	7.7832	-0.4388	7.7807	-0.4413	0.0057	-1.0462	-1.0522
791	CHEMBL4063362	Training	7.559	7.8406	0.2816	7.8426	0.2836	0.0072	0.6719	0.6768
792	CHEMBL4063897	Training	7.31	7.5122	0.2022	7.5127	0.2027	0.0026	0.4813	0.4825
793	CHEMBL4064995	Training	7.987	7.9358	-0.0512	7.9354	-0.0516	0.0072	-0.1222	-0.1231
794	CHEMBL4066047	Training	7.442	7.6411	0.1991	7.6423	0.2003	0.0057	0.4747	0.4775
795	CHEMBL4066125	Training	7.921	7.7972	-0.1238	7.7965	-0.1245	0.0057	-0.2952	-0.2969
796	CHEMBL4066971	Training	6.481	6.5061	0.0251	6.5062	0.0252	0.0061	0.0598	0.0601
797	CHEMBL4068056	Training	7.529	8.0723	0.5433	8.0773	0.5483	0.0092	1.2975	1.3095
798	CHEMBL4068577	Training	6.801	7.0816	0.2806	7.0831	0.2821	0.0053	0.6689	0.6725
799	CHEMBL4069104	Training	7.041	7.7594	0.7184	7.7647	0.7237	0.0073	1.7142	1.7268
800	CHEMBL4069315	Training	6.487	6.7593	0.2723	6.7623	0.2753	0.0107	0.6509	0.658
801	CHEMBL4069360	Training	7.043	7.5354	0.4924	7.5377	0.4947	0.0046	1.1734	1.1788
802	CHEMBL4070284	Training	8.057	7.8056	-0.2514	7.8038	-0.2532	0.0072	-0.5998	-0.6042
803	CHEMBL4070785	Training	7.699	7.3292	-0.3698	7.3202	-0.3788	0.0237	-0.8899	-0.9115
804	CHEMBL4070850	Training	7.738	7.8952	0.1572	7.8963	0.1583	0.0072	0.3751	0.3778
805	CHEMBL4071451	Training	7.174	6.4262	-0.7478	6.4214	-0.7526	0.0064	-1.7834	-1.7949
806	CHEMBL4071816	Prediction	8.036	7.8714	-0.1646	-	-	0.0072	-0.3927	-0.3927
807	CHEMBL4073450	Training	8.161	7.8672	-0.2938	7.8651	-0.2959	0.0072	-0.701	-0.7061
808	CHEMBL4073586	Training	8.301	7.6397	-0.6613	7.6366	-0.6644	0.0047	-1.5759	-1.5834
809	CHEMBL4074058	Training	7.991	7.7692	-0.2218	7.7679	-0.2231	0.0057	-0.5288	-0.5318
810	CHEMBL4074234	Training	7.55	7.8294	0.2794	7.831	0.281	0.0058	0.6661	0.67
811	CHEMBL4074732	Training	7.735	7.6796	-0.0554	7.6792	-0.0558	0.0074	-0.1321	-0.1331
812	CHEMBL4075144	Training	6.699	6.5873	-0.1117	6.5865	-0.1125	0.0065	-0.2665	-0.2682
813	CHEMBL4075422	Training	5.618	6.2631	0.6451	6.2723	0.6543	0.0141	1.5445	1.5666
814	CHEMBL4075673	Training	6.602	6.5641	-0.0379	6.5639	-0.0381	0.0059	-0.0903	-0.0908
815	CHEMBL4075727	Training	7.284	6.9731	-0.3109	6.9716	-0.3124	0.0049	-0.7409	-0.7446
816	CHEMBL4076408	Training	6.352	6.6929	0.3409	6.6954	0.3434	0.0074	0.8133	0.8194
817	CHEMBL4076525	Training	5.836	6.5795	0.7435	6.5864	0.7504	0.0092	1.7757	1.7922
818	CHEMBL4077040	Training	7.444	6.5655	-0.8785	6.5603	-0.8837	0.0059	-2.0946	-2.107
819	CHEMBL4077077	Prediction	7.252	6.9731	-0.2789	-	-	0.0049	-0.6647	-0.6647
820	CHEMBL4077537	Training	8.347	7.8903	-0.4567	7.887	-0.46	0.0072	-1.0897	-1.0976
821	CHEMBL4077937	Training	7.036	6.5929	-0.4431	6.59	-0.446	0.0064	-1.0569	-1.0638
822	CHEMBL4078873	Training	7.469	6.457	-1.012	6.4506	-1.0184	0.0063	-2.4134	-2.4288
823	CHEMBL4078912	Training	7.447	7.8952	0.4482	7.8984	0.4514	0.0072	1.0694	1.0771
824	CHEMBL4079150	Training	7.056	7.0816	0.0256	7.0818	0.0258	0.0053	0.0611	0.0614
825	CHEMBL4079397	Training	7.194	7.0816	-0.1124	7.081	-0.113	0.0053	-0.2679	-0.2693
826	CHEMBL4079859	Training	7.939	7.9834	0.0444	7.9837	0.0447	0.0072	0.1059	0.1066
827	CHEMBL4079871	Training	7.301	7.9484	0.6474	7.9531	0.6521	0.0072	1.5446	1.5558
828	CHEMBL4080086	Training	6.924	7.3681	0.4441	7.3699	0.4459	0.0041	1.058	1.0623
829	CHEMBL4080312	Training	7.523	7.0816	-0.4414	7.0792	-0.4438	0.0053	-1.0522	-1.0578
830	CHEMBL4080369	Training	6.678	6.5606	-0.1174	6.5599	-0.1181	0.0059	-0.2798	-0.2815
831	CHEMBL4080398	Training	5.991	6.5809	0.5899	6.5863	0.5953	0.0092	1.4088	1.4219
832	CHEMBL4080399	Training	7.523	6.6132	-0.9098	6.6074	-0.9156	0.0063	-2.1699	-2.1837
833	CHEMBL4081987	Training	7	6.3814	-0.6186	6.3769	-0.6231	0.0072	-1.4759	-1.4867
834	CHEMBL4082319	Training	7.629	7.7769	0.1479	7.7777	0.1487	0.0057	0.3526	0.3546
835	CHEMBL4083289	Training	8.244	7.9414	-0.3026	7.9392	-0.3048	0.0072	-0.722	-0.7273
836	CHEMBL4083893	Training	8.108	7.8525	-0.2555	7.8507	-0.2573	0.0072	-0.6096	-0.614
837	CHEMBL4083959	Prediction	7.423	7.835	0.412	-	-	0.0072	0.983	0.983
838	CHEMBL4085003	Training	7.936	7.7615	-0.1745	7.7602	-0.1758	0.0073	-0.4163	-0.4194
839	CHEMBL4085349	Training	7.237	7.6964	0.4594	7.699	0.462	0.0057	1.0953	1.1015
840	CHEMBL4085802	Prediction	7.456	6.7006	-0.7554	-	-	0.0059	-1.8011	-1.8011
841	CHEMBL4085949	Training	8.036	7.7818	-0.2542	7.7803	-0.2557	0.0057	-0.6061	-0.6096
842	CHEMBL4086515	Training	7.658	7.1901	-0.4679	7.1871	-0.4709	0.0063	-1.1159	-1.123
843	CHEMBL4087852	Training	6.495	6.3738	-0.1212	6.373	-0.122	0.0066	-0.2892	-0.2911
844	CHEMBL4087957	Training	8.018	7.7734	-0.2446	7.772	-0.246	0.0057	-0.5832	-0.5865
845	CHEMBL4088170	Training	7	6.9731	-0.0269	6.973	-0.027	0.0049	-0.0641	-0.0644
846	CHEMBL4090168	Prediction	7.538	7.7195	0.1815	-	-	0.0057	0.4327	0.4327
847	CHEMBL4090177	Prediction	7.728	7.8483	0.1203	-	-	0.0058	0.2868	0.2868
848	CHEMBL4090395	Training	7.523	7.5921	0.0691	7.5925	0.0695	0.0057	0.1648	0.1658
849	CHEMBL4091082	Training	6.317	6.7724	0.4554	6.7774	0.4604	0.0109	1.0885	1.1004
850	CHEMBL4091193	Training	6.921	6.8049	-0.1161	6.8042	-0.1168	0.0066	-0.2768	-0.2787
851	CHEMBL4091721	Training	7.81	7.9414	0.1314	7.9423	0.1323	0.0072	0.3135	0.3157
852	CHEMBL4092243	Training	6.602	6.317	-0.285	6.3149	-0.2871	0.0073	-0.6799	-0.685
853	CHEMBL4092681	Training	8.108	7.821	-0.287	7.8195	-0.2885	0.0052	-0.6842	-0.6877
854	CHEMBL4093110	Training	7.788	7.9015	0.1135	7.9023	0.1143	0.0072	0.2708	0.2727
855	CHEMBL4093699	Training	8.398	7.8973	-0.5007	7.8937	-0.5043	0.0072	-1.1947	-1.2033
856	CHEMBL4095054	Training	8.125	7.8966	-0.2284	7.8949	-0.2301	0.0072	-0.545	-0.5489
857	CHEMBL4095446	Training	7.255	7.6824	0.4274	7.6849	0.4299	0.0057	1.019	1.0248
858	CHEMBL4095670	Training	7.6	7.8413	0.2413	7.8431	0.2431	0.0072	0.5757	0.5799
859	CHEMBL4095896	Training	6.357	6.9731	0.6161	6.9762	0.6192	0.0049	1.4683	1.4756
860	CHEMBL4095979	Training	6.523	6.4844	-0.0386	6.4841	-0.0389	0.0062	-0.0921	-0.0927
861	CHEMBL4097459	Training	8.222	7.8924	-0.3296	7.89	-0.332	0.0072	-0.7864	-0.7921
862	CHEMBL4097856	Training	7.022	7.1901	0.1681	7.1912	0.1692	0.0063	0.4009	0.4035
863	CHEMBL4097882	Training	7.194	7.751	0.557	7.7542	0.5602	0.0057	1.328	1.3355
864	CHEMBL4097893	Prediction	7.457	7.8784	0.4214	-	-	0.0072	1.0054	1.0054
865	CHEMBL4098120	Training	7.194	7.5879	0.3939	7.5902	0.3962	0.0057	0.9392	0.9447
866	CHEMBL4098336	Training	7.097	6.9731	-0.1239	6.9725	-0.1245	0.0049	-0.2953	-0.2967
867	CHEMBL4098815	Prediction	7.506	7.5865	0.0805	-	-	0.0047	0.1918	0.1918
868	CHEMBL4100411	Training	8.367	7.9512	-0.4158	7.9482	-0.4188	0.0072	-0.9921	-0.9993
869	CHEMBL4100818	Training	7.721	7.8686	0.1476	7.8697	0.1487	0.0072	0.3522	0.3547
870	CHEMBL4101418	Training	7.845	7.6565	-0.1885	7.6554	-0.1896	0.0057	-0.4494	-0.4519
871	CHEMBL4101944	Training	6.458	7.2202	0.7622	7.2385	0.7805	0.0235	1.8337	1.8778
872	CHEMBL4103190	Training	7.224	7.7713	0.5473	7.7744	0.5504	0.0057	1.3048	1.3123
873	CHEMBL4103281	Training	8.108	7.6936	-0.4144	7.6912	-0.4168	0.0057	-0.988	-0.9936
874	CHEMBL4103397	Training	7.495	7.0816	-0.4134	7.0794	-0.4156	0.0053	-0.9854	-0.9907
875	CHEMBL4103475	Prediction	6.506	7.0979	0.5919	-	-	0.0136	1.4167	1.4167
876	CHEMBL4103656	Training	6.714	7.0816	0.3676	7.0836	0.3696	0.0053	0.8763	0.881
877	CHEMBL4103725	Training	6.745	6.5963	-0.1487	6.5955	-0.1495	0.0058	-0.3545	-0.3565
878	CHEMBL4103877	Training	7.77	7.765	-0.005	7.765	-0.005	0.0073	-0.0119	-0.012
879	CHEMBL4104479	Prediction	7.553	7.0816	-0.4714	-	-	0.0053	-1.1237	-1.1237
880	CHEMBL4104596	Prediction	6.886	6.5627	-0.3233	-	-	0.0059	-0.7708	-0.7708
881	CHEMBL4105377	Training	8.244	7.9393	-0.3047	7.9371	-0.3069	0.0072	-0.727	-0.7323
882	CHEMBL410710	Training	7.004	6.6346	-0.3694	6.6318	-0.3722	0.0076	-0.8816	-0.8883
883	CHEMBL4125735	Prediction	8.523	8.6304	0.1074	-	-	0.0111	0.2567	0.2567
884	CHEMBL4126145	Training	5.595	6.0109	0.4159	6.0144	0.4194	0.0084	0.9928	1.0012
885	CHEMBL4126633	Training	7.31	7.6753	0.3653	7.6762	0.3662	0.0025	0.8695	0.8717
886	CHEMBL4128013	Training	7.215	7.7509	0.5359	7.7526	0.5376	0.0031	1.276	1.28
887	CHEMBL4129259	Training	7.347	7.557	0.21	7.5576	0.2106	0.0027	0.4999	0.5013
888	CHEMBL413525	Training	8.398	8.1603	-0.2377	8.1595	-0.2385	0.0031	-0.566	-0.5678
889	CHEMBL415	Training	6.951	6.5391	-0.4119	6.5355	-0.4155	0.0088	-0.9836	-0.9922
890	CHEMBL415046	Training	7.155	7.3939	0.2389	7.3946	0.2396	0.0031	0.5688	0.5705
891	CHEMBL4159555	Training	6.959	6.5865	-0.3725	6.5797	-0.3793	0.018	-0.8936	-0.9099
892	CHEMBL4160798	Training	7.377	6.7561	-0.6209	6.7525	-0.6245	0.0057	-1.4803	-1.4889
893	CHEMBL4160888	Training	7.523	7.1901	-0.3329	7.188	-0.335	0.0063	-0.7939	-0.7989
894	CHEMBL4161125	Training	7.678	7.2986	-0.3794	7.2956	-0.3824	0.0078	-0.9055	-0.9126
895	CHEMBL4161308	Prediction	7.699	7.1901	-0.5089	-	-	0.0063	-1.2136	-1.2136
896	CHEMBL4162914	Prediction	6.595	7.1901	0.5951	-	-	0.0063	1.4193	1.4193
897	CHEMBL4164195	Training	6.506	6.7561	0.2501	6.7575	0.2515	0.0057	0.5963	0.5997
898	CHEMBL4164639	Training	5.903	6.1525	0.2495	6.1572	0.2542	0.0184	0.5987	0.6099
899	CHEMBL4164725	Training	7.097	7.2986	0.2016	7.3002	0.2032	0.0078	0.4812	0.485
900	CHEMBL4165620	Training	7.444	7.2986	-0.1454	7.2975	-0.1465	0.0078	-0.347	-0.3497
901	CHEMBL4166040	Training	6.857	7.1901	0.3331	7.1922	0.3352	0.0063	0.7945	0.7995
902	CHEMBL4166211	Training	6.783	7.2986	0.5156	7.3027	0.5197	0.0078	1.2307	1.2404
903	CHEMBL4166372	Training	6.495	6.5865	0.0915	6.5882	0.0932	0.018	0.2196	0.2236
904	CHEMBL4167974	Training	6.752	7.2986	0.5466	7.3029	0.5509	0.0078	1.3046	1.315
905	CHEMBL4168070	Training	6.79	7.1901	0.4001	7.1927	0.4027	0.0063	0.9542	0.9603
906	CHEMBL4168165	Training	6.967	7.0816	0.1146	7.0822	0.1152	0.0053	0.2732	0.2747
907	CHEMBL4169050	Training	7.208	6.8646	-0.3434	6.8629	-0.3451	0.0051	-0.8184	-0.8226
908	CHEMBL4169236	Training	7.886	7.2986	-0.5874	7.294	-0.592	0.0078	-1.4019	-1.413
909	CHEMBL4170187	Training	7.481	6.5865	-0.8945	6.5701	-0.9109	0.018	-2.1459	-2.1852
910	CHEMBL4171417	Training	7.097	6.8646	-0.2324	6.8634	-0.2336	0.0051	-0.5539	-0.5567
911	CHEMBL4171504	Training	7.377	7.1901	-0.1869	7.1889	-0.1881	0.0063	-0.4457	-0.4485
912	CHEMBL4172073	Training	7.585	7.1901	-0.3949	7.1876	-0.3974	0.0063	-0.9418	-0.9478
913	CHEMBL4172424	Prediction	7.244	7.1901	-0.0539	-	-	0.0063	-0.1285	-0.1285
914	CHEMBL4172521	Training	5.887	6.1525	0.2655	6.1575	0.2705	0.0184	0.6371	0.6491
915	CHEMBL4172620	Training	7.036	7.2986	0.2626	7.3007	0.2647	0.0078	0.6268	0.6318
916	CHEMBL4173336	Prediction	6.347	6.5865	0.2395	-	-	0.018	0.5747	0.5747
917	CHEMBL4173628	Training	6.9	7.0816	0.1816	7.0826	0.1826	0.0053	0.4329	0.4352
918	CHEMBL4173960	Training	7.215	7.2986	0.0836	7.2993	0.0843	0.0078	0.1996	0.2012
919	CHEMBL4174125	Training	6.848	7.1901	0.3421	7.1923	0.3443	0.0063	0.8159	0.8211
920	CHEMBL4174680	Training	6.996	7.2986	0.3026	7.301	0.305	0.0078	0.7223	0.728
921	CHEMBL4174854	Training	7.252	6.7561	-0.4959	6.7532	-0.4988	0.0057	-1.1823	-1.1891
922	CHEMBL4176014	Training	6.971	7.0816	0.1106	7.0822	0.1112	0.0053	0.2637	0.2651
923	CHEMBL4202520	Training	5.277	5.4585	0.1815	5.4616	0.1846	0.0169	0.4353	0.4427
924	CHEMBL4202947	Training	5.203	5.4585	0.2555	5.4629	0.2599	0.0169	0.6127	0.6232
925	CHEMBL4203310	Training	5.667	6.1356	0.4686	6.1463	0.4793	0.0222	1.1266	1.1522
926	CHEMBL4203581	Prediction	5.111	5.2415	0.1305	-	-	0.0149	0.3126	0.3126
927	CHEMBL4206366	Training	5.183	5.4585	0.2755	5.4633	0.2803	0.0169	0.6606	0.672
928	CHEMBL4206881	Training	5.255	5.35	0.095	5.3515	0.0965	0.0156	0.2277	0.2313
929	CHEMBL4207653	Prediction	5.615	6.0109	0.3959	-	-	0.0084	0.9451	0.9451
930	CHEMBL4207835	Training	5.324	5.4585	0.1345	5.4608	0.1368	0.0169	0.3226	0.3281
931	CHEMBL4207884	Training	6.606	6.8646	0.2586	6.8659	0.2599	0.0051	0.6164	0.6195
932	CHEMBL4208468	Training	5.771	5.35	-0.421	5.3434	-0.4276	0.0156	-1.0087	-1.0247
933	CHEMBL4208934	Training	6.917	7.0816	0.1646	7.0825	0.1655	0.0053	0.3924	0.3945
934	CHEMBL4209274	Training	6.381	6.8646	0.4836	6.8671	0.4861	0.0051	1.1526	1.1585
935	CHEMBL4209807	Training	5.546	5.2415	-0.3045	5.2369	-0.3091	0.0149	-0.7293	-0.7403
936	CHEMBL4210782	Training	6.963	6.8646	-0.0984	6.8641	-0.0989	0.0051	-0.2345	-0.2357
937	CHEMBL4211253	Training	5.698	5.4585	-0.2395	5.4544	-0.2436	0.0169	-0.5742	-0.584
938	CHEMBL4213352	Training	5.812	6.2279	0.4159	6.2311	0.4191	0.0077	0.9925	1.0001
939	CHEMBL4214208	Training	5.339	5.4585	0.1195	5.4606	0.1216	0.0169	0.2866	0.2915
940	CHEMBL4214709	Training	5.947	5.2415	-0.7055	5.2309	-0.7161	0.0149	-1.6898	-1.7153
941	CHEMBL4215875	Training	6.308	6.9731	0.6651	6.9764	0.6684	0.0049	1.5851	1.593
942	CHEMBL4216126	Training	6.572	6.3058	-0.2662	6.3028	-0.2692	0.0111	-0.6364	-0.6435
943	CHEMBL4216263	Training	5.778	6.042	0.264	6.0467	0.2687	0.0175	0.6333	0.6445
944	CHEMBL4217761	Training	6.699	6.1356	-0.5634	6.1228	-0.5762	0.0222	-1.3545	-1.3853
945	CHEMBL4218625	Training	5.324	5.35	0.026	5.3504	0.0264	0.0156	0.0624	0.0634
946	CHEMBL4218801	Training	6.444	6.8646	0.4206	6.8667	0.4227	0.0051	1.0025	1.0076
947	CHEMBL4238897	Training	6.463	7.3228	0.8598	7.3275	0.8645	0.0055	2.0497	2.061
948	CHEMBL4239705	Training	6.983	7.3571	0.3741	7.3592	0.3762	0.0056	0.8918	0.8969
949	CHEMBL4243497	Training	6.458	7.1632	0.7052	7.1673	0.7093	0.0058	1.6814	1.6912
950	CHEMBL4243579	Training	7.036	6.7412	-0.2948	6.7394	-0.2966	0.006	-0.703	-0.7073
951	CHEMBL4243932	Training	6.886	7.439	0.553	7.4422	0.5562	0.0059	1.3185	1.3263
952	CHEMBL4245997	Prediction	6.116	6.6523	0.5363	-	-	0.006	1.2788	1.2788
953	CHEMBL4248597	Training	6.193	6.7244	0.5314	6.7276	0.5346	0.006	1.2671	1.2748
954	CHEMBL4249179	Training	6.536	6.7153	0.1793	6.7164	0.1804	0.006	0.4275	0.4301
955	CHEMBL4249640	Training	6.304	6.6425	0.3385	6.6445	0.3405	0.006	0.8072	0.8121
956	CHEMBL425197	Training	7.658	7.7907	0.1327	7.7911	0.1331	0.0025	0.3159	0.3167
957	CHEMBL425714	Prediction	7.796	8.1484	0.3524	-	-	0.0031	0.839	0.839
958	CHEMBL426567	Training	6.975	6.5391	-0.4359	6.5352	-0.4398	0.0088	-1.0409	-1.0501
959	CHEMBL426640	Training	8.1	8.4911	0.3911	8.4926	0.3926	0.0038	0.9316	0.9351
960	CHEMBL427184	Training	8.155	7.9391	-0.2159	7.9385	-0.2165	0.0029	-0.514	-0.5154
961	CHEMBL427354	Training	7.244	7.0816	-0.1624	7.0807	-0.1633	0.0053	-0.3871	-0.3892
962	CHEMBL431298	Prediction	8.589	8.2958	-0.2932	-	-	0.0035	-0.6982	-0.6982
963	CHEMBL433461	Training	7.291	8.2622	0.9712	8.2733	0.9823	0.0113	2.3221	2.3487
964	CHEMBL433765	Training	7.538	6.8646	-0.6734	6.8612	-0.6768	0.0051	-1.605	-1.6131
965	CHEMBL433979	Prediction	6.609	6.9017	0.2927	-	-	0.0142	0.701	0.701
966	CHEMBL434365	Prediction	7.42	7.85	0.43	-	-	0.0028	1.0237	1.0237
967	CHEMBL434932	Prediction	8.523	8.1435	-0.3795	-	-	0.0031	-0.9037	-0.9037
968	CHEMBL435534	Training	6.866	6.9731	0.1071	6.9736	0.1076	0.0049	0.2553	0.2565
969	CHEMBL4434735	Training	5.765	6.1151	0.3501	6.1193	0.3543	0.0119	0.8372	0.8473
970	CHEMBL4435528	Training	7.26	6.5391	-0.7209	6.5327	-0.7273	0.0088	-1.7214	-1.7366
971	CHEMBL4435529	Training	6.963	6.8646	-0.0984	6.8641	-0.0989	0.0051	-0.2345	-0.2357
972	CHEMBL4438349	Training	6.26	6.042	-0.218	6.0382	-0.2218	0.0175	-0.5228	-0.532
973	CHEMBL4438777	Training	6.879	6.6476	-0.2314	6.646	-0.233	0.007	-0.552	-0.5559
974	CHEMBL4440130	Prediction	8.398	7.8691	-0.5289	-	-	0.0025	-1.259	-1.259
975	CHEMBL4440402	Training	7.854	7.6022	-0.2518	7.6	-0.254	0.0089	-0.6012	-0.6066
976	CHEMBL4440598	Prediction	7.745	7.7144	-0.0306	-	-	0.0025	-0.0727	-0.0727
977	CHEMBL4440695	Training	7.237	6.6623	-0.5747	6.6533	-0.5837	0.0156	-1.3769	-1.3987
978	CHEMBL4441060	Training	8	7.1702	-0.8298	7.1556	-0.8444	0.0173	-1.99	-2.025
979	CHEMBL4441691	Training	6.323	6.6476	0.3246	6.6499	0.3269	0.007	0.7744	0.7798
980	CHEMBL4442332	Training	8	7.8066	-0.1934	7.8049	-0.1951	0.0089	-0.4618	-0.466
981	CHEMBL4442337	Training	5.19	5.825	0.635	5.8356	0.6456	0.0163	1.5222	1.5474
982	CHEMBL4442385	Training	5.835	5.7938	-0.0412	5.7934	-0.0416	0.0113	-0.0984	-0.0995
983	CHEMBL4442456	Prediction	7.699	7.7103	0.0113	-	-	0.0025	0.0268	0.0268
984	CHEMBL4444655	Training	7.699	7.7775	0.0785	7.7777	0.0787	0.0031	0.1868	0.1874
985	CHEMBL4446018	Prediction	7.62	7.7942	0.1742	-	-	0.0025	0.4147	0.4147
986	CHEMBL4446215	Training	7.602	7.6569	0.0549	7.6573	0.0553	0.008	0.1309	0.132
987	CHEMBL4447200	Prediction	7.745	7.669	-0.076	-	-	0.0026	-0.181	-0.181
988	CHEMBL4447330	Prediction	5.239	5.7938	0.5548	-	-	0.0113	1.3266	1.3266
989	CHEMBL4449148	Prediction	6.306	6.1691	-0.1369	-	-	0.0098	-0.327	-0.327
990	CHEMBL445	Training	6.67	6.8646	0.1946	6.8656	0.1956	0.0051	0.4638	0.4662
991	CHEMBL4450907	Training	7.469	6.8951	-0.5739	6.8855	-0.5835	0.0165	-1.3757	-1.3987
992	CHEMBL4451494	Prediction	5.771	6.5391	0.7681	-	-	0.0088	1.8341	1.8341
993	CHEMBL4451666	Training	7.301	7.1317	-0.1693	7.1288	-0.1722	0.017	-0.406	-0.413
994	CHEMBL4451939	Training	8.046	7.7941	-0.2519	7.792	-0.254	0.0082	-0.6014	-0.6064
995	CHEMBL4452121	Training	5.38	5.9335	0.5535	5.9429	0.5629	0.0166	1.327	1.3494
996	CHEMBL4452416	Training	7.959	7.7949	-0.1641	7.7945	-0.1645	0.0025	-0.3905	-0.3915
997	CHEMBL4452569	Training	5.54	6.1505	0.6105	6.1623	0.6223	0.0189	1.4654	1.4935
998	CHEMBL4453250	Training	7.638	7.6758	0.0378	7.6761	0.0381	0.0081	0.0901	0.0909
999	CHEMBL4453733	Prediction	7.678	8.1656	0.4876	-	-	0.0041	1.1617	1.1617
1000	CHEMBL4454105	Prediction	6.804	6.2236	-0.5804	-	-	0.0099	-1.3867	-1.3867
1001	CHEMBL4454873	Training	6.658	6.8646	0.2066	6.8657	0.2077	0.0051	0.4924	0.4949
1002	CHEMBL4456046	Training	6.036	6.2236	0.1876	6.2254	0.1894	0.0099	0.4481	0.4526
1003	CHEMBL4456224	Prediction	8.222	7.7445	-0.4775	-	-	0.0025	-1.1365	-1.1365
1004	CHEMBL445652	Training	7.745	8.1469	0.4019	8.1483	0.4033	0.0033	0.9572	0.9603
1005	CHEMBL4457045	Training	6.282	6.6476	0.3656	6.6502	0.3682	0.007	0.8722	0.8783
1006	CHEMBL4457109	Training	6.338	6.2236	-0.1144	6.2224	-0.1156	0.0099	-0.2734	-0.2761
1007	CHEMBL4458840	Training	6.701	6.3221	-0.3789	6.3167	-0.3843	0.014	-0.9072	-0.92
1008	CHEMBL4459863	Training	7.432	7.7768	0.3448	7.7778	0.3458	0.0031	0.8209	0.8234
1009	CHEMBL4461327	Training	8	7.6148	-0.3852	7.6113	-0.3887	0.009	-0.9198	-0.9282
1010	CHEMBL446194	Training	7.509	8.0861	0.5771	8.0878	0.5788	0.0031	1.374	1.3782
1011	CHEMBL4462814	Training	7.041	6.6476	-0.3934	6.6448	-0.3962	0.007	-0.9385	-0.9451
1012	CHEMBL4462820	Training	5.53	6.042	0.512	6.0511	0.5211	0.0175	1.2281	1.2499
1013	CHEMBL4462839	Training	5.896	6.2236	0.3276	6.2268	0.3308	0.0099	0.7826	0.7904
1014	CHEMBL4463737	Prediction	6.804	7.7163	0.9123	-	-	0.0084	2.1781	2.1781
1015	CHEMBL4464285	Training	6.519	6.5391	0.0201	6.5393	0.0203	0.0088	0.048	0.0484
1016	CHEMBL4464377	Prediction	5.52	5.825	0.305	-	-	0.0163	0.7312	0.7312
1017	CHEMBL4464512	Training	6.429	6.2229	-0.2061	6.2208	-0.2082	0.0099	-0.4925	-0.4974
1018	CHEMBL4464881	Prediction	7.119	6.6476	-0.4714	-	-	0.007	-1.1246	-1.1246
1019	CHEMBL4465181	Training	6.879	6.1144	-0.7646	6.1052	-0.7738	0.0119	-1.8287	-1.8507
1020	CHEMBL4465638	Training	8.046	7.6191	-0.4269	7.6157	-0.4303	0.0079	-1.019	-1.0271
1021	CHEMBL4465929	Training	6.295	7.0816	0.7866	7.0858	0.7908	0.0053	1.8751	1.8852
1022	CHEMBL4466071	Training	7.796	7.6127	-0.1833	7.6111	-0.1849	0.009	-0.4377	-0.4416
1023	CHEMBL4467357	Prediction	6.462	6.5391	0.0771	-	-	0.0088	0.1841	0.1841
1024	CHEMBL4467359	Training	7.102	7.1646	0.0626	7.1657	0.0637	0.0172	0.1501	0.1527
1025	CHEMBL4468014	Prediction	6.979	8.0243	1.0453	-	-	0.0095	2.4969	2.4969
1026	CHEMBL4468235	Training	6.255	6.7561	0.5011	6.759	0.504	0.0057	1.1947	1.2016
1027	CHEMBL4468396	Training	7	7.8598	0.8598	7.8679	0.8679	0.0093	2.0536	2.0729
1028	CHEMBL4469147	Training	7.824	7.4007	-0.4233	7.3974	-0.4266	0.0078	-1.0103	-1.0183
1029	CHEMBL4469325	Training	6.607	7.2107	0.6037	7.2153	0.6083	0.0075	1.4406	1.4515
1030	CHEMBL4469539	Training	5.851	5.5638	-0.2872	5.5615	-0.2895	0.008	-0.6855	-0.691
1031	CHEMBL4469792	Training	8	7.9032	-0.0968	7.9024	-0.0976	0.0087	-0.2311	-0.2331
1032	CHEMBL4469860	Prediction	7.538	7.5616	0.0236	-	-	0.0087	0.0565	0.0565
1033	CHEMBL4469870	Prediction	7.523	7.8572	0.3342	-	-	0.003	0.7958	0.7958
1034	CHEMBL4470304	Training	5.28	5.7938	0.5138	5.7997	0.5197	0.0113	1.2286	1.2426
1035	CHEMBL4470487	Training	6.983	6.2236	-0.7594	6.216	-0.767	0.0099	-1.8144	-1.8325
1036	CHEMBL4470718	Prediction	8.301	7.7249	-0.5761	-	-	0.0025	-1.3712	-1.3712
1037	CHEMBL4471055	Prediction	8.097	7.6386	-0.4584	-	-	0.0092	-1.0947	-1.0947
1038	CHEMBL4472629	Training	8.398	7.5099	-0.8881	7.5032	-0.8948	0.0074	-2.1192	-2.1351
1039	CHEMBL4473026	Prediction	5.791	6.2236	0.4326	-	-	0.0099	1.0335	1.0335
1040	CHEMBL4473083	Training	6.893	7.0816	0.1886	7.0826	0.1896	0.0053	0.4496	0.452
1041	CHEMBL4476372	Prediction	5.79	6.042	0.252	-	-	0.0175	0.6045	0.6045
1042	CHEMBL4476520	Training	5.46	6.042	0.582	6.0524	0.5924	0.0175	1.396	1.4208
1043	CHEMBL4483304	Training	7.77	7.4056	-0.3644	7.4027	-0.3673	0.0078	-0.8698	-0.8766
1044	CHEMBL4514440	Training	7.699	7.9375	0.2385	7.9382	0.2392	0.003	0.5678	0.5696
1045	CHEMBL4515075	Training	7.721	7.3825	-0.3385	7.3814	-0.3396	0.0033	-0.806	-0.8087
1046	CHEMBL4516621	Prediction	6.22	6.042	-0.178	-	-	0.0175	-0.4268	-0.4268
1047	CHEMBL4516784	Training	7.721	7.8395	0.1185	7.8405	0.1195	0.0084	0.283	0.2854
1048	CHEMBL4519266	Prediction	7.046	6.6476	-0.3984	-	-	0.007	-0.9505	-0.9505
1049	CHEMBL4520580	Training	8.319	7.8418	-0.4772	7.8379	-0.4811	0.0081	-1.1391	-1.1484
1050	CHEMBL4521199	Training	7.854	7.722	-0.132	7.7209	-0.1331	0.0079	-0.3151	-0.3176
1051	CHEMBL4524981	Training	6.83	7.0816	0.2516	7.083	0.253	0.0053	0.5998	0.603
1052	CHEMBL4526012	Training	6.611	5.9335	-0.6775	5.9221	-0.6889	0.0166	-1.6241	-1.6516
1053	CHEMBL4527124	Prediction	6.45	7.0816	0.6316	-	-	0.0053	1.5056	1.5056
1054	CHEMBL4530023	Prediction	7.886	8.0649	0.1789	-	-	0.0025	0.4259	0.4259
1055	CHEMBL4530770	Training	6.149	6.4013	0.2523	6.4057	0.2567	0.0172	0.605	0.6156
1056	CHEMBL4532712	Prediction	6.684	7.0816	0.3976	-	-	0.0053	0.9478	0.9478
1057	CHEMBL4532741	Prediction	6.46	5.6853	-0.7747	-	-	0.0136	-1.8543	-1.8543
1058	CHEMBL4534733	Training	8.086	7.7779	-0.3081	7.7767	-0.3093	0.0039	-0.7339	-0.7368
1059	CHEMBL4535764	Training	6.111	6.8646	0.7536	6.8684	0.7574	0.0051	1.7961	1.8053
1060	CHEMBL4536834	Training	7.149	7.2517	0.1027	7.2526	0.1036	0.0085	0.2453	0.2474
1061	CHEMBL4537701	Prediction	6.971	7.6751	0.7041	-	-	0.0081	1.6806	1.6806
1062	CHEMBL4538667	Training	5.485	5.9023	0.4173	5.9064	0.4214	0.0096	0.997	1.0066
1063	CHEMBL4540404	Prediction	6.013	6.2236	0.2106	-	-	0.0099	0.5031	0.5031
1064	CHEMBL4541473	Training	7.678	7.296	-0.382	7.2945	-0.3835	0.0041	-0.9099	-0.9136
1065	CHEMBL4541526	Prediction	6.39	6.042	-0.348	-	-	0.0175	-0.8345	-0.8345
1066	CHEMBL4541828	Training	7.921	7.7957	-0.1253	7.7953	-0.1257	0.003	-0.2984	-0.2993
1067	CHEMBL4543169	Training	7.658	7.7859	0.1279	7.7863	0.1283	0.0031	0.3044	0.3054
1068	CHEMBL4544099	Training	7.638	7.4359	-0.2021	7.434	-0.204	0.0092	-0.4828	-0.4873
1069	CHEMBL4548041	Training	6.889	7.0816	0.1926	7.0826	0.1936	0.0053	0.4591	0.4616
1070	CHEMBL4549734	Training	7.553	7.5263	-0.0267	7.5262	-0.0268	0.0058	-0.0635	-0.0639
1071	CHEMBL4550561	Training	7.377	7.6577	0.2807	7.6607	0.2837	0.0108	0.6709	0.6782
1072	CHEMBL4550806	Training	8.046	7.8712	-0.1748	7.8698	-0.1762	0.008	-0.4173	-0.4207
1073	CHEMBL4551197	Prediction	8.097	7.8265	-0.2705	-	-	0.003	-0.6442	-0.6442
1074	CHEMBL4551220	Training	7.222	7.2322	0.0102	7.2322	0.0102	0.0084	0.0242	0.0244
1075	CHEMBL4551858	Training	8.569	8.0033	-0.5657	8.0019	-0.5671	0.0024	-1.3465	-1.3498
1076	CHEMBL4552168	Training	8.046	7.7339	-0.3121	7.7314	-0.3146	0.0079	-0.745	-0.751
1077	CHEMBL4555115	Training	6.1	5.9335	-0.1665	5.9307	-0.1693	0.0166	-0.3991	-0.4058
1078	CHEMBL4555349	Training	5.61	5.9335	0.3235	5.939	0.329	0.0166	0.7756	0.7887
1079	CHEMBL4557068	Prediction	7.301	7.6324	0.3314	-	-	0.0076	0.7909	0.7909
1080	CHEMBL4557247	Training	7.585	7.2537	-0.3313	7.2527	-0.3323	0.0033	-0.7888	-0.7914
1081	CHEMBL4558202	Training	5.42	6.042	0.622	6.0531	0.6331	0.0175	1.4919	1.5184
1082	CHEMBL4558397	Prediction	6.378	6.5391	0.1611	-	-	0.0088	0.3847	0.3847
1083	CHEMBL4558433	Prediction	8.155	7.788	-0.367	-	-	0.0031	-0.8739	-0.8739
1084	CHEMBL4558840	Training	7.086	7.846	0.76	7.8483	0.7623	0.003	1.8096	1.815
1085	CHEMBL4559172	Training	7.959	7.7586	-0.2004	7.7579	-0.2011	0.0031	-0.4772	-0.4787
1086	CHEMBL4559312	Prediction	5.87	6.042	0.172	-	-	0.0175	0.4126	0.4126
1087	CHEMBL4559790	Training	6.275	6.6476	0.3726	6.6502	0.3752	0.007	0.8889	0.8952
1088	CHEMBL4562787	Training	6.889	7.4183	0.5293	7.4231	0.5341	0.0089	1.2641	1.2755
1089	CHEMBL4564093	Prediction	5.706	5.9023	0.1963	-	-	0.0096	0.469	0.469
1090	CHEMBL4565216	Training	7.854	7.874	0.02	7.8741	0.0201	0.0029	0.0477	0.0479
1091	CHEMBL4565614	Training	6.578	6.6476	0.0696	6.6481	0.0701	0.007	0.166	0.1672
1092	CHEMBL4565881	Training	5.31	5.825	0.515	5.8336	0.5236	0.0163	1.2345	1.255
1093	CHEMBL4566557	Training	7.886	7.6253	-0.2607	7.6229	-0.2631	0.0091	-0.6225	-0.6282
1094	CHEMBL4566992	Prediction	7.509	7.4618	-0.0472	-	-	0.0093	-0.1128	-0.1128
1095	CHEMBL45695	Prediction	8.244	7.9865	-0.2575	-	-	0.0032	-0.6132	-0.6132
1096	CHEMBL4569676	Training	7.921	7.9858	0.0648	7.986	0.065	0.0024	0.1542	0.1546
1097	CHEMBL4569757	Training	6.036	6.2243	0.1883	6.2261	0.1901	0.0099	0.4498	0.4543
1098	CHEMBL4570584	Training	7.06	7.0816	0.0216	7.0817	0.0217	0.0053	0.0515	0.0518
1099	CHEMBL4571045	Training	7.886	7.6557	-0.2303	7.6551	-0.2309	0.0026	-0.5483	-0.5497
1100	CHEMBL4571059	Training	7.347	7.7737	0.4267	7.7754	0.4284	0.0039	1.0164	1.0203
1101	CHEMBL4571077	Training	6.74	6.6232	-0.1168	6.6218	-0.1182	0.0118	-0.2794	-0.2827
1102	CHEMBL4571469	Training	7.509	7.605	0.096	7.6059	0.0969	0.0089	0.2293	0.2314
1103	CHEMBL4572158	Training	8.046	7.7747	-0.2713	7.7738	-0.2722	0.0031	-0.6461	-0.6481
1104	CHEMBL4572260	Training	8.585	7.9412	-0.6438	7.9363	-0.6487	0.0076	-1.5364	-1.5481
1105	CHEMBL4573880	Training	7.081	7.5421	0.4611	7.546	0.465	0.0085	1.1008	1.1103
1106	CHEMBL4573883	Training	5.23	5.825	0.595	5.8349	0.6049	0.0163	1.4263	1.4499
1107	CHEMBL457570	Prediction	7.292	7.6533	0.3613	-	-	0.0035	0.8605	0.8605
1108	CHEMBL4578632	Training	7.602	8.0033	0.4013	8.0043	0.4023	0.0024	0.9552	0.9575
1109	CHEMBL4579883	Training	7.131	7.214	0.083	7.2147	0.0837	0.0083	0.198	0.1997
1110	CHEMBL4583507	Training	5.46	6.042	0.582	6.0524	0.5924	0.0175	1.396	1.4208
1111	CHEMBL4584325	Training	6.629	7.0816	0.4526	7.084	0.455	0.0053	1.0789	1.0847
1112	CHEMBL4584719	Prediction	6.173	5.7938	-0.3792	-	-	0.0113	-0.9065	-0.9065
1113	CHEMBL4585956	Training	6.1	6.042	-0.058	6.041	-0.059	0.0175	-0.139	-0.1415
1114	CHEMBL4586276	Prediction	7.602	7.8619	0.2599	-	-	0.0028	0.6188	0.6188
1115	CHEMBL4586353	Training	7.854	7.7822	-0.0718	7.7816	-0.0724	0.0081	-0.1715	-0.1729
1116	CHEMBL4589391	Training	6.77	7.2322	0.4622	7.2361	0.4661	0.0084	1.1034	1.1127
1117	CHEMBL4591250	Training	6.903	7.228	0.325	7.2307	0.3277	0.0084	0.7758	0.7824
1118	CHEMBL4591410	Training	6.917	6.5391	-0.3779	6.5358	-0.3812	0.0088	-0.9024	-0.9103
1119	CHEMBL4591630	Prediction	6.607	6.8646	0.2576	-	-	0.0051	0.614	0.614
1120	CHEMBL4591878	Training	6.9	7.2684	0.3684	7.2696	0.3696	0.0032	0.8773	0.8802
1121	CHEMBL4592085	Training	7.745	7.2241	-0.5209	7.2147	-0.5303	0.0176	-1.2495	-1.2719
1122	CHEMBL4592256	Training	5.86	6.042	0.182	6.0453	0.1853	0.0175	0.4366	0.4444
1123	CHEMBL4592941	Training	5.629	6.2222	0.5932	6.2281	0.5991	0.0099	1.4172	1.4313
1124	CHEMBL459347	Prediction	7.658	8.0719	0.4139	-	-	0.0026	0.9852	0.9852
1125	CHEMBL459348	Training	7.658	8.1769	0.5189	8.1783	0.5203	0.0026	1.2352	1.2385
1126	CHEMBL459349	Prediction	7.387	8.1041	0.7171	-	-	0.0027	1.7071	1.7071
1127	CHEMBL459371	Prediction	7.921	7.7564	-0.1646	-	-	0.0113	-0.3935	-0.3935
1128	CHEMBL459372	Training	7.886	8.2875	0.4015	8.2886	0.4026	0.0029	0.9558	0.9586
1129	CHEMBL45977	Training	8.523	7.948	-0.575	7.9462	-0.5768	0.0031	-1.3691	-1.3733
1130	CHEMBL45987	Training	8.328	8.0025	-0.3255	8.0009	-0.3271	0.005	-0.7757	-0.7796
1131	CHEMBL459987	Training	8.149	8.3148	0.1658	8.3153	0.1663	0.003	0.3947	0.3958
1132	CHEMBL459988	Prediction	8.013	8.2742	0.2612	-	-	0.0029	0.6218	0.6218
1133	CHEMBL459989	Training	7.602	8.025	0.423	8.0261	0.4241	0.0025	1.0069	1.0094
1134	CHEMBL460001	Training	7.056	7.6479	0.5919	7.654	0.598	0.0102	1.4144	1.429
1135	CHEMBL460194	Training	7.886	8.1202	0.2342	8.1208	0.2348	0.0028	0.5575	0.559
1136	CHEMBL460195	Training	8.509	8.3918	-0.1172	8.3914	-0.1176	0.0034	-0.2792	-0.2801
1137	CHEMBL462529	Training	7.509	8.1034	0.5944	8.105	0.596	0.0027	1.415	1.4188
1138	CHEMBL4632519	Training	5.519	5.7938	0.2748	5.797	0.278	0.0113	0.6571	0.6647
1139	CHEMBL4635229	Training	6.382	6.9731	0.5911	6.976	0.594	0.0049	1.4088	1.4157
1140	CHEMBL4635363	Training	5.942	5.7938	-0.1482	5.7922	-0.1498	0.0113	-0.3542	-0.3583
1141	CHEMBL4636165	Training	6.451	7.1901	0.7391	7.1948	0.7438	0.0063	1.7627	1.7739
1142	CHEMBL4636435	Training	5.657	5.7938	0.1368	5.7954	0.1384	0.0113	0.3272	0.3309
1143	CHEMBL4638308	Training	6.724	6.4573	-0.2667	6.4544	-0.2696	0.0108	-0.6374	-0.6444
1144	CHEMBL4639203	Training	6.271	5.7938	-0.4772	5.7884	-0.4826	0.0113	-1.1408	-1.1539
1145	CHEMBL4639400	Prediction	6.879	7.0816	0.2026	-	-	0.0053	0.483	0.483
1146	CHEMBL4640150	Training	6.703	7.1901	0.4871	7.1932	0.4902	0.0063	1.1617	1.1691
1147	CHEMBL4640332	Training	6.387	7.0816	0.6946	7.0853	0.6983	0.0053	1.6558	1.6647
1148	CHEMBL4640588	Training	7.066	7.3035	0.2375	7.3044	0.2384	0.0038	0.5656	0.5677
1149	CHEMBL464099	Training	6.514	6.9731	0.4591	6.9754	0.4614	0.0049	1.0942	1.0996
1150	CHEMBL4641296	Training	6.499	7.2511	0.7521	7.2582	0.7592	0.0093	1.7965	1.8133
1151	CHEMBL4641609	Training	6.313	6.3418	0.0288	6.3422	0.0292	0.013	0.069	0.0699
1152	CHEMBL4642034	Training	6.492	7.0816	0.5896	7.0848	0.5928	0.0053	1.4055	1.413
1153	CHEMBL4642981	Training	6.421	6.3481	-0.0729	6.3472	-0.0738	0.0131	-0.1744	-0.1767
1154	CHEMBL4643450	Training	6.724	6.5595	-0.1645	6.558	-0.166	0.009	-0.3928	-0.3964
1155	CHEMBL4644906	Training	6.094	6.451	0.357	6.4549	0.3609	0.0108	0.8534	0.8627
1156	CHEMBL4645292	Training	5.312	6.0109	0.6989	6.0168	0.7048	0.0084	1.6684	1.6826
1157	CHEMBL4645308	Training	5.785	5.9023	0.1173	5.9035	0.1185	0.0096	0.2803	0.283
1158	CHEMBL4645793	Training	6.656	6.9962	0.3402	7.001	0.345	0.0139	0.8145	0.826
1159	CHEMBL4645997	Training	6.896	6.9731	0.0771	6.9735	0.0775	0.0049	0.1838	0.1847
1160	CHEMBL4646172	Training	6.991	7.1901	0.1991	7.1914	0.2004	0.0063	0.4749	0.4779
1161	CHEMBL4646861	Training	6.483	7.0816	0.5986	7.0848	0.6018	0.0053	1.4269	1.4346
1162	CHEMBL4648581	Training	6.599	6.4566	-0.1424	6.4551	-0.1439	0.0108	-0.3403	-0.344
1163	CHEMBL4649697	Training	6.449	7.1901	0.7411	7.1948	0.7458	0.0063	1.7675	1.7787
1164	CHEMBL471099	Training	7.721	7.7921	0.0711	7.7923	0.0713	0.0028	0.1693	0.1698
1165	CHEMBL471783	Training	7.387	7.902	0.515	7.9033	0.5163	0.0026	1.2259	1.2291
1166	CHEMBL476006	Training	8.347	8.3679	0.0209	8.368	0.021	0.0056	0.0498	0.0501
1167	CHEMBL47691	Training	8.481	7.9802	-0.5008	7.9786	-0.5024	0.0032	-1.1925	-1.1964
1168	CHEMBL477650	Prediction	7.276	8.088	0.812	-	-	0.0037	1.9339	1.9339
1169	CHEMBL478894	Training	7.77	7.8347	0.0647	7.8355	0.0655	0.0121	0.1549	0.1568
1170	CHEMBL478895	Training	7.509	7.8396	0.3306	7.8437	0.3347	0.0122	0.7909	0.8006
1171	CHEMBL479349	Training	7.538	7.8761	0.3381	7.877	0.339	0.0026	0.8048	0.8069
1172	CHEMBL479362	Training	7.481	7.8194	0.3384	7.8203	0.3393	0.0025	0.8056	0.8076
1173	CHEMBL479374	Prediction	7.301	7.245	-0.056	-	-	0.0076	-0.1337	-0.1337
1174	CHEMBL479375	Training	6.907	7.1456	0.2386	7.1472	0.2402	0.0066	0.5691	0.5728
1175	CHEMBL479548	Training	7.721	7.8082	0.0872	7.8084	0.0874	0.0025	0.2076	0.2082
1176	CHEMBL480123	Training	7.921	7.7095	-0.2115	7.709	-0.212	0.0027	-0.5034	-0.5048
1177	CHEMBL481278	Training	7.051	7.7417	0.6907	7.7436	0.6926	0.0027	1.6443	1.6488
1178	CHEMBL481472	Training	7.337	7.7403	0.4033	7.7414	0.4044	0.0027	0.9601	0.9628
1179	CHEMBL482099	Training	6.298	6.9335	0.6355	6.9374	0.6394	0.0062	1.5155	1.5249
1180	CHEMBL482736	Training	7.301	7.9153	0.6143	7.9171	0.6161	0.0029	1.4626	1.4669
1181	CHEMBL482757	Training	8.398	7.7796	-0.6184	7.7777	-0.6203	0.0031	-1.4725	-1.4771
1182	CHEMBL484333	Training	7.824	7.1967	-0.6273	7.192	-0.632	0.0075	-1.4969	-1.5083
1183	CHEMBL484345	Prediction	8.102	7.846	-0.256	-	-	0.003	-0.6094	-0.6094
1184	CHEMBL494675	Prediction	6.225	6.8646	0.6396	-	-	0.0051	1.5244	1.5244
1185	CHEMBL49598	Training	8.444	7.7933	-0.6507	7.7916	-0.6524	0.0027	-1.549	-1.5531
1186	CHEMBL500305	Training	7.481	7.6843	0.2033	7.6849	0.2039	0.0026	0.484	0.4853
1187	CHEMBL511489	Prediction	7.745	7.9993	0.2543	-	-	0.0029	0.6055	0.6055
1188	CHEMBL512332	Training	5.765	5.9335	0.1685	5.9364	0.1714	0.0166	0.404	0.4109
1189	CHEMBL513051	Prediction	7.638	7.7942	0.1562	-	-	0.0025	0.3719	0.3719
1190	CHEMBL515307	Prediction	8	8.3854	0.3854	-	-	0.0057	0.9188	0.9188
1191	CHEMBL517707	Prediction	7.444	7.7592	0.3152	-	-	0.0113	0.7537	0.7537
1192	CHEMBL518017	Training	7.481	8.0698	0.5888	8.0713	0.5903	0.0026	1.4016	1.4052
1193	CHEMBL518153	Training	7.721	7.6892	-0.0318	7.6891	-0.0319	0.0026	-0.0756	-0.0758
1194	CHEMBL518762	Prediction	7.071	7.7809	0.7099	-	-	0.0025	1.6899	1.6899
1195	CHEMBL518781	Training	7.268	8.1027	0.8347	8.1048	0.8368	0.0025	1.9869	1.9919
1196	CHEMBL519299	Training	6.857	7.1358	0.2788	7.1376	0.2806	0.0065	0.665	0.6693
1197	CHEMBL520777	Training	7.167	7.8789	0.7119	7.8807	0.7137	0.0026	1.6946	1.699
1198	CHEMBL521419	Training	7.921	7.3311	-0.5899	7.3265	-0.5945	0.0078	-1.408	-1.419
1199	CHEMBL521426	Training	7.62	7.9398	0.3198	7.9408	0.3208	0.0029	0.7614	0.7637
1200	CHEMBL53904	Training	6.772	6.9369	0.1649	6.941	0.169	0.0243	0.3969	0.4068
1201	CHEMBL539327	Training	6.194	6.6476	0.4536	6.6508	0.4568	0.007	1.0822	1.0898
1202	CHEMBL539587	Training	6.26	6.6476	0.3876	6.6503	0.3903	0.007	0.9247	0.9312
1203	CHEMBL539589	Training	7.222	6.6476	-0.5744	6.6436	-0.5784	0.007	-1.3703	-1.38
1204	CHEMBL54	Training	5.965	5.4553	-0.5097	5.4505	-0.5145	0.0093	-1.2174	-1.2288
1205	CHEMBL565724	Training	9.046	8.795	-0.251	8.7933	-0.2527	0.0068	-0.5987	-0.6028
1206	CHEMBL565730	Training	8.328	8.0028	-0.3252	8.0016	-0.3264	0.0036	-0.7746	-0.7774
1207	CHEMBL565731	Training	8.678	8.2037	-0.4743	8.2021	-0.4759	0.0032	-1.1295	-1.1331
1208	CHEMBL565746	Training	9.046	8.7894	-0.2566	8.7877	-0.2583	0.0067	-0.612	-0.6162
1209	CHEMBL565753	Training	7.824	8.4584	0.6344	8.4611	0.6371	0.0043	1.5114	1.5179
1210	CHEMBL565977	Training	8.367	8.2618	-0.1052	8.2614	-0.1056	0.0034	-0.2506	-0.2515
1211	CHEMBL566218	Training	7.5	6.9731	-0.5269	6.9705	-0.5295	0.0049	-1.2557	-1.2619
1212	CHEMBL566219	Prediction	7.481	6.9731	-0.5079	-	-	0.0049	-1.2104	-1.2104
1213	CHEMBL566410	Training	7.383	7.0816	-0.3014	7.08	-0.303	0.0053	-0.7184	-0.7223
1214	CHEMBL567805	Prediction	7.056	7.5123	0.4563	-	-	0.0084	1.0895	1.0895
1215	CHEMBL568249	Training	8.046	8.2911	0.2451	8.292	0.246	0.0035	0.5838	0.5859
1216	CHEMBL568672	Training	8.328	7.9209	-0.4071	7.9196	-0.4084	0.0032	-0.9695	-0.9726
1217	CHEMBL568673	Training	7.932	8.1532	0.2212	8.154	0.222	0.0033	0.5269	0.5286
1218	CHEMBL568935	Training	8.77	8.2855	-0.4845	8.2839	-0.4861	0.0035	-1.1537	-1.1578
1219	CHEMBL571215	Prediction	7.337	8.1295	0.7925	-	-	0.003	1.8869	1.8869
1220	CHEMBL571413	Training	7.456	8.1449	0.6889	8.147	0.691	0.0031	1.6402	1.6453
1221	CHEMBL571858	Training	8.316	8.1477	-0.1683	8.1472	-0.1688	0.0031	-0.4008	-0.402
1222	CHEMBL571878	Training	7.947	8.2121	0.2651	8.2131	0.2661	0.0038	0.6314	0.6338
1223	CHEMBL572092	Training	8.409	8.28	-0.129	8.2795	-0.1295	0.0038	-0.3073	-0.3085
1224	CHEMBL573981	Training	7.585	7.1655	-0.4195	7.1625	-0.4225	0.0071	-1.0008	-1.0079
1225	CHEMBL574403	Prediction	8.658	8.3532	-0.3048	-	-	0.0055	-0.7266	-0.7266
1226	CHEMBL574856	Prediction	7.208	7.2033	-0.0047	-	-	0.0072	-0.0111	-0.0111
1227	CHEMBL575270	Training	8.284	7.808	-0.476	7.8029	-0.4811	0.0105	-1.1376	-1.1497
1228	CHEMBL575310	Prediction	8.523	8.4869	-0.0361	-	-	0.0047	-0.0861	-0.0861
1229	CHEMBL576315	Training	8.26	8.1218	-0.1382	8.1213	-0.1387	0.0032	-0.3292	-0.3302
1230	CHEMBL577687	Training	8.377	8.2037	-0.1733	8.2031	-0.1739	0.0032	-0.4127	-0.4141
1231	CHEMBL578411	Prediction	7.352	7.0816	-0.2704	-	-	0.0053	-0.6445	-0.6445
1232	CHEMBL578826	Prediction	7.638	8.1288	0.4908	-	-	0.0032	1.1686	1.1686
1233	CHEMBL579063	Training	7.347	8.147	0.8	8.1494	0.8024	0.0031	1.9048	1.9107
1234	CHEMBL583389	Prediction	8.481	8.4787	-0.0023	-	-	0.0044	-0.0055	-0.0055
1235	CHEMBL583677	Training	7.119	8.0371	0.9181	8.0398	0.9208	0.0029	2.1859	2.1923
1236	CHEMBL584046	Prediction	8.638	8.2513	-0.3867	-	-	0.0034	-0.921	-0.921
1237	CHEMBL584474	Training	7.347	7.7132	0.3662	7.717	0.37	0.0102	0.8751	0.8841
1238	CHEMBL585931	Prediction	7.658	8.0315	0.3735	-	-	0.0029	0.8892	0.8892
1239	CHEMBL589390	Training	7.524	6.7561	-0.7679	6.7517	-0.7723	0.0057	-1.8308	-1.8414
1240	CHEMBL595301	Prediction	7.194	7.8612	0.6672	-	-	0.0093	1.5936	1.5936
1241	CHEMBL605292	Prediction	7.097	7.8325	0.7355	-	-	0.0107	1.758	1.758
1242	CHEMBL605938	Training	8.523	8.3735	-0.1495	8.3726	-0.1504	0.0056	-0.3565	-0.3585
1243	CHEMBL606549	Prediction	8.523	7.6967	-0.8263	-	-	0.0036	-1.9679	-1.9679
1244	CHEMBL606639	Prediction	8.699	7.8353	-0.8637	-	-	0.0027	-2.0561	-2.0561
1245	CHEMBL606703	Training	8.398	7.7331	-0.6649	7.7314	-0.6666	0.0026	-1.5827	-1.5867
1246	CHEMBL606704	Training	8.523	7.7975	-0.7255	7.7956	-0.7274	0.0027	-1.727	-1.7316
1247	CHEMBL606705	Prediction	8.097	7.6296	-0.4674	-	-	0.0025	-1.1127	-1.1127
1248	CHEMBL606706	Training	7.796	7.8619	0.0659	7.8621	0.0661	0.0028	0.1569	0.1573
1249	CHEMBL606763	Training	7.658	7.8465	0.1885	7.847	0.189	0.0028	0.4488	0.45
1250	CHEMBL606764	Training	7.959	7.9396	-0.0194	7.9396	-0.0194	0.0023	-0.0461	-0.0462
1251	CHEMBL606765	Prediction	7.921	7.7975	-0.1235	-	-	0.0027	-0.2939	-0.2939
1252	CHEMBL606766	Training	7.469	7.6512	0.1822	7.6519	0.1829	0.0035	0.434	0.4355
1253	CHEMBL606815	Training	8	7.7989	-0.2011	7.7984	-0.2016	0.0027	-0.4787	-0.48
1254	CHEMBL606816	Training	8.097	7.619	-0.478	7.6174	-0.4796	0.0034	-1.1382	-1.1421
1255	CHEMBL606818	Training	8.155	8.0082	-0.1468	8.0078	-0.1472	0.0025	-0.3494	-0.3503
1256	CHEMBL606868	Training	7.444	7.9445	0.5005	7.9457	0.5017	0.0023	1.1913	1.1941
1257	CHEMBL609736	Prediction	7.456	7.8941	0.4381	-	-	0.0023	1.0428	1.0428
1258	CHEMBL609737	Training	8.398	7.8227	-0.5753	7.8211	-0.5769	0.0027	-1.3695	-1.3733
1259	CHEMBL609738	Training	8.398	7.7247	-0.6733	7.723	-0.675	0.0026	-1.6026	-1.6067
1260	CHEMBL609739	Training	8.301	7.8171	-0.4839	7.8158	-0.4852	0.0027	-1.1519	-1.155
1261	CHEMBL609740	Training	8.398	7.8045	-0.5935	7.8029	-0.5951	0.0027	-1.4128	-1.4166
1262	CHEMBL609742	Training	8.523	7.8388	-0.6842	7.8369	-0.6861	0.0027	-1.6288	-1.6333
1263	CHEMBL609743	Training	8.523	7.8395	-0.6835	7.8376	-0.6854	0.0028	-1.6271	-1.6316
1264	CHEMBL609991	Training	8.398	7.9018	-0.4962	7.9007	-0.4973	0.0023	-1.1809	-1.1837
1265	CHEMBL609993	Training	8.301	7.7583	-0.5427	7.7569	-0.5441	0.0026	-1.2918	-1.2952
1266	CHEMBL609996	Training	9	7.9277	-1.0723	7.9252	-1.0748	0.0023	-2.5522	-2.5581
1267	CHEMBL610255	Training	8.046	7.7541	-0.2919	7.7534	-0.2926	0.0026	-0.6948	-0.6966
1268	CHEMBL610257	Training	8.523	7.8612	-0.6618	7.8593	-0.6637	0.0028	-1.5755	-1.58
1269	CHEMBL610258	Training	7.62	7.7597	0.1397	7.7601	0.1401	0.0026	0.3326	0.3335
1270	CHEMBL610259	Prediction	8.046	7.9487	-0.0973	-	-	0.0023	-0.2316	-0.2316
1271	CHEMBL71	Training	7.3	7.6484	0.3484	7.6503	0.3503	0.0053	0.8305	0.8349
1272	CHEMBL715	Training	8.125	7.8151	-0.3099	7.8142	-0.3108	0.0027	-0.7378	-0.7398
1273	CHEMBL85	Training	6.016	5.4553	-0.5607	5.4501	-0.5659	0.0093	-1.3392	-1.3517
1274	CHEMBL93240	Training	8.598	8.2307	-0.3673	8.2253	-0.3727	0.0143	-0.8796	-0.8924
1275	CHEMBL95136	Training	8.854	8.5869	-0.2671	8.5832	-0.2708	0.0138	-0.6393	-0.6483
1276	CHEMBL97158	Training	8.7	8.2258	-0.4742	8.2243	-0.4757	0.0032	-1.129	-1.1326
1277	CHEMBL97211	Training	8.9	8.2272	-0.6728	8.2251	-0.6749	0.0032	-1.6019	-1.607
1278	CHEMBL98404	Training	8.102	8.1146	0.0126	8.1146	0.0126	0.0027	0.0299	0.03

## Sheet: correlation-matrix
com_Hhyd_3A	fsp3Cdon1B	sp3N_sp2O_8B	KRFPC620	fliporingN3B	ringC_S_4Bc
1
0.316	1
0.3182	0.5925	1
0.5576	0.5826	0.4859	1
-0.0699	-0.2634	-0.1586	-0.0917	1
0.3687	-0.0983	-0.2324	0.1503	0.1299	1
